# Supplementary material for: Copper-catalyzed reductive coupling of aryl sulfonyl chlorides with H-phosphonates leading to S-aryl phosphorothioates
Source: Royal Society of Chemistry journal article supplement (doi:10.1039/c4cc02693d), 2014-01-01
Supplement: c4cc02693d1.pdf [file c4cc02693d1.pdf]

Supporting information for

**Copper-catalyzed Reductive Coupling of Aryl Sulfonyl Chlorides  
with H-Phosponates Leading to S-Aryl Phosphorothioates**

**Jie Bai,<sup>a</sup> Xiuling Cui,<sup>\*a, b</sup> Hui Wang,<sup>a</sup> and Yangjie Wu<sup>\*a</sup>**

<sup>a</sup> Department of Chemistry, Henan Key Laboratory of Chemical Biology and Organic Chemistry, Key Laboratory of Applied Chemistry of Henan Universities, Zhengzhou University, Zhengzhou, 450052, P R China.

E-mail: [cuixl@zzu.edu.cn](mailto:cuixl@zzu.edu.cn); [wyl@zzu.edu.cn](mailto:wyl@zzu.edu.cn); Tel: +86 371-67767753

<sup>b</sup> Xiamen Key Laboratory of Ocean and Gene Drugs, School of biomedical Sciences, and Institute of Molecular Medicine of Huaqiao University & Engineering Research Center of Molecular Medicine of Chinese Education Ministry, Fujian, Xiamen, 361021 E-mail: [cuixl@hqu.edu.cn](mailto:cuixl@hqu.edu.cn)

**Contents**

|                                                                |         |
|----------------------------------------------------------------|---------|
| General Information                                            | S2      |
| Experimental Procedures                                        | S2      |
| Characterization of S-Aryl Phosphorothioates and Intermediates | S2-S8   |
| References                                                     | S8-S9   |
| NMR Spectra                                                    | S10-S77 |

## General Information:

All reagents were used directly without further purification. Silica gel was purchased from Qing Dao Hai Yang Chemical Industry Co.  $^1\text{H}$  NMR spectra were recorded on a **Bruker DPX-400** (400 MHz) spectrometer with deuterated chloroform as solutions. The chemical shifts  $\delta$  are reported in ppm relative to tetramethylsilane. The multiplicity of signals is designated by the following abbreviations: s (singlet), d (doublet), t (triplet), q (quartet), m (multiplet). Coupling constants,  $J$ , are reported in Hertz (Hz).  $^{13}\text{C}$  NMR spectra were recorded at 100 MHz on **Bruker DPX-400**. The chemical shifts  $\delta$  are reported relative to residual  $\text{CHCl}_3$  ( $\delta_c = 77.00$  ppm). High resolution mass spectra (HRMS) were obtained on an **Agilent LC-MSD-Trap-XCT 6450** spectrometer with micromass MS software using electrospray ionisation (ESI).

## Experimental Procedure:

### Typical Procedure for Copper-catalyzed Direct Coupling of Aryl Sulfonyl Chlorides with H-Phosphonates.

Aryl sulfonyl chloride (0.4 mmol), H-phosphonate (2.8 mmol) and  $\text{Cu}(\text{OAc})_2$  (15 mol %) were added to a 10 mL round-bottomed flask and then 2.5 mL  $\text{CH}_3\text{CN}$  was added. The reaction mixture was stirred at 140 °C for 24 h. After the reaction was complete, the mixture was evaporated in vacuum. The crude product was purified by flash chromatography on silica gel using hexane/ethyl acetate as the eluent to give the pure product.

### The recovery of dimethyl phosphonate **2a** ( $^1\text{H}$ NMR yield).

When the reaction of tosyl chloride (**1a**) and dimethyl phosphonate (**2a**) (1:7) was performed in the presence of  $\text{Cu}(\text{OAc})_2$  (15 mol%) in  $\text{CH}_3\text{CN}$  at 100 °C for 24 h, the desired product was obtained in 64% yield. The reaction system was detected by NMR and **2a** was recovered in 55% yield calculated from  $^1\text{H}$  NMR spectrum. The characterization was reflected (Page 76-77).

### Characterization of S-Aryl Phosphorothioates

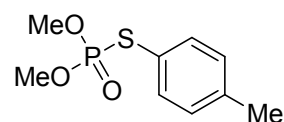

**3a**  $^1\text{H}$  NMR: Colorless oil; Yield: 76%;  $^1\text{H}$  NMR (400 MHz,  $\text{CDCl}_3$ )  $\delta$  7.43 (dd,  $J=8.0$  Hz, 1.6 Hz, 2H), 7.16 (d,  $J=8.0$  Hz, 2H), 3.82 (s, 3H), 3.79 (s, 3H), 2.34 (s, 3H);  $^{13}\text{C}$  NMR (100 MHz,  $\text{CDCl}_3$ )  $\delta$  139.6 (d,  $J=3.2$  Hz), 134.7 (d,  $J=5.0$  Hz), 130.3 (d,  $J=2.4$  Hz), 122.3 (d,  $J=7.3$  Hz), 54.3 (d,  $J=6.0$  Hz), 21.2;  $^{31}\text{P}$  NMR (162 MHz,  $\text{CDCl}_3$ )  $\delta$  27.0; HRMS:  $m/z$   $[\text{M}+\text{H}]^+$  calcd for  $\text{C}_9\text{H}_{14}\text{O}_3\text{PS}^+$ : 233.0396; found: 233.0397.

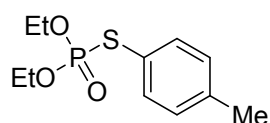

**3b**<sup>2</sup>: Colorless oil; Yield: 73%; <sup>1</sup>H NMR (400 MHz, CDCl<sub>3</sub>) δ 7.41 (dd, J=8.0 Hz, 1.6 Hz, 2H), 7.13 (d, J=8.0 Hz, 2H), 4.23-4.08 (m, 4H), 2.32 (s, 3H), 1.28 (t, J=7.0 Hz, 6H); <sup>13</sup>C NMR (100 MHz, CDCl<sub>3</sub>) δ 139.3 (d, J=3.1 Hz), 134.6 (d, J=5.0 Hz), 130.2 (d, J=2.3 Hz), 122.8 (d, J=7.2 Hz), 64.0 (d, J=6.2 Hz), 21.2, 16.0 (d, J=7.2 Hz); <sup>31</sup>P NMR (162 MHz, CDCl<sub>3</sub>) δ 23.7; HRMS: m/z [M+H]<sup>+</sup> calcd for C<sub>11</sub>H<sub>18</sub>O<sub>3</sub>PS<sup>+</sup>: 261.0709; found: 261.0712.

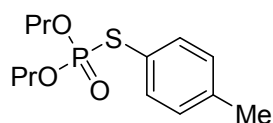

**3c**<sup>2c</sup>: Colorless oil; Yield: 71%; <sup>1</sup>H NMR (400 MHz, CDCl<sub>3</sub>) δ 7.42 (dd, J=8.2 Hz, 1.6 Hz, 2H), 7.12 (d, J=8.0 Hz, 2H), 4.11-3.98 (m, 4H), 2.31 (s, 3H), 1.70-1.61 (m, 4H), 0.90 (t, J=7.4 Hz, 6H); <sup>13</sup>C NMR (100 MHz, CDCl<sub>3</sub>) δ 139.2 (d, J=3.1 Hz), 134.6 (d, J=5.1 Hz), 130.1 (d, J=2.2 Hz), 122.8 (d, J=7.3 Hz), 69.4 (d, J=6.6 Hz), 23.6 (d, J=7.2 Hz), 21.2, 10.0; <sup>31</sup>P NMR (162 MHz, CDCl<sub>3</sub>) δ 23.8; HRMS: m/z [M+H]<sup>+</sup> calcd for C<sub>13</sub>H<sub>22</sub>O<sub>3</sub>PS<sup>+</sup>: 289.1022; found: 289.1025.

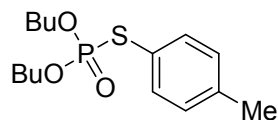

**3d**<sup>3</sup>: Colorless oil; Yield: 72%; <sup>1</sup>H NMR (400 MHz, CDCl<sub>3</sub>) δ 7.41 (dd, J=8.2 Hz, 1.9 Hz, 2H), 7.12 (d, J=8.0 Hz, 2H), 4.15-4.01 (m, 4H), 2.32 (s, 3H), 1.64-1.56 (m, 4H), 1.38-1.28 (m, 4H), 0.88 (t, J=7.4 Hz, 6H); <sup>13</sup>C NMR (100 MHz, CDCl<sub>3</sub>) δ 139.2 (d, J=3.1 Hz), 134.6 (d, J=5.1 Hz), 130.1 (d, J=2.3 Hz), 122.9 (d, J=7.2 Hz), 67.7 (d, J=6.6 Hz), 32.2 (d, J=7.0 Hz), 21.2, 18.7, 13.6; <sup>31</sup>P NMR (162 MHz, CDCl<sub>3</sub>) δ 23.8; HRMS: m/z [M+H]<sup>+</sup> calcd for C<sub>15</sub>H<sub>26</sub>O<sub>3</sub>PS<sup>+</sup>: 317.1335; found: 317.1339.

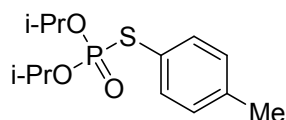

**3e**<sup>2a, 2c, 3b</sup>: Colorless oil; Yield: 66%; <sup>1</sup>H NMR (400 MHz, CDCl<sub>3</sub>) δ 7.45 (dd, J=8.2 Hz, 1.6 Hz, 2H), 7.11 (d, J=8.0 Hz, 2H), 4.78-4.70 (m, 2H), 2.32 (s, 3H), 1.30 (d, J=6.4 Hz, 6H), 1.24 (d, J=6.0 Hz, 6H); <sup>13</sup>C NMR (100 MHz, CDCl<sub>3</sub>) δ 138.9 (d, J=3.0 Hz), 134.3 (d, J=5.3 Hz), 130.0 (d, J=2.1 Hz), 123.5 (d, J=7.1 Hz), 73.2 (d, J=6.7 Hz),

23.8 (d, J=4.0 Hz), 23.5 (d, J=5.7 Hz), 21.3;  $^{31}\text{P}$  NMR (162 MHz,  $\text{CDCl}_3$ )  $\delta$  21.3; HRMS:  $m/z$   $[\text{M}+\text{H}]^+$  calcd for  $\text{C}_{13}\text{H}_{22}\text{O}_3\text{PS}^+$ : 289.1022; found: 289.1023.

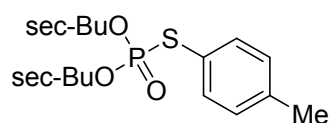

**3f**: Colorless oil; Yield: 71%;  $^1\text{H}$  NMR (400 MHz,  $\text{CDCl}_3$ )  $\delta$  7.46 (d, J=7.2 Hz, 2H), 7.11 (d, J=7.6 Hz, 2H), 4.53 (d, J=6.8 Hz, 2H), 2.31 (s, 3H), 1.69-1.49 (m, 4H), 1.29 (d, J=6.0 Hz, 3H), 1.23 (d, J=6.0 Hz, 3H), 0.90-0.83 (m, 6H);  $^{13}\text{C}$  NMR (100 MHz,  $\text{CDCl}_3$ )  $\delta$  138.8 (d, J=2.8 Hz), 134.4 (d, J=5.3 Hz), 129.9 (d, J=2.1 Hz), 123.6 (d, J=7.1 Hz), 78.0-77.7 (m), 30.4 (d, J=5.0 Hz), 30.2 (d, J=6.4 Hz), 21.2, 21.1 (d, J=2.8 Hz), 20.8 (d, J=4.2 Hz), 9.3 (d, J=4.2 Hz);  $^{31}\text{P}$  NMR (162 MHz,  $\text{CDCl}_3$ )  $\delta$  21.7; HRMS:  $m/z$   $[\text{M}+\text{H}]^+$  calcd for  $\text{C}_{15}\text{H}_{26}\text{O}_3\text{PS}^+$ : 317.1335; found: 317.1338.

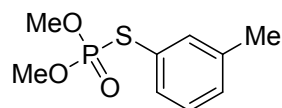

**3g**<sup>4</sup>: Colorless oil; Yield: 73%;  $^1\text{H}$  NMR (400 MHz,  $\text{CDCl}_3$ )  $\delta$  7.34 (d, J=8.0 Hz, 2H), 7.22 (t, J=7.6 Hz, 1H), 7.15 (d, J=7.6 Hz, 1H), 3.81 (s, 3H), 3.78 (s, 3H), 2.33 (s, 3H);  $^{13}\text{C}$  NMR (100 MHz,  $\text{CDCl}_3$ )  $\delta$  139.4 (d, J=2.3 Hz), 135.2 (d, J=5.2 Hz), 131.6 (d, J=5.2 Hz), 130.1 (d, J=3.0 Hz), 129.3 (d, J=2.3 Hz), 125.6 (d, J=7.2 Hz), 54.3 (d, J=6.1 Hz), 21.3;  $^{31}\text{P}$  NMR (162 MHz,  $\text{CDCl}_3$ )  $\delta$  26.9; HRMS:  $m/z$   $[\text{M}+\text{H}]^+$  calcd for  $\text{C}_9\text{H}_{14}\text{O}_3\text{PS}^+$ : 233.0396; found: 233.0397.

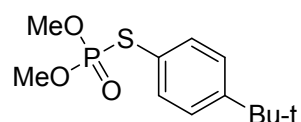

**3h**<sup>5</sup>: Colorless oil; Yield: 70%;  $^1\text{H}$  NMR (400 MHz,  $\text{CDCl}_3$ )  $\delta$  7.44 (d, J=7.6 Hz, 2H), 7.34 (d, J=8.4 Hz, 2H), 3.81 (s, 3H), 3.78 (s, 3H), 1.28 (s, 9H);  $^{13}\text{C}$  NMR (100 MHz,  $\text{CDCl}_3$ )  $\delta$  152.5 (d, J=3.2 Hz), 134.3 (d, J=5.1 Hz), 126.6 (d, J=2.2 Hz), 122.2 (d, J=7.2 Hz), 54.2 (d, J=6.0 Hz), 34.7, 31.1;  $^{31}\text{P}$  NMR (162 MHz,  $\text{CDCl}_3$ )  $\delta$  27.1; HRMS:  $m/z$   $[\text{M}+\text{H}]^+$  calcd for  $\text{C}_{12}\text{H}_{20}\text{O}_3\text{PS}^+$ : 275.0865; found: 275.0872.

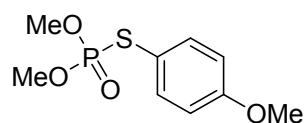

**3i**<sup>3a, 6</sup>: Colorless oil; Yield: 79%;  $^1\text{H}$  NMR (400 MHz,  $\text{CDCl}_3$ )  $\delta$  7.44 (dd, J=8.6 Hz, 2.4 Hz, 2H), 6.86 (d, J=8.4 Hz, 2H), 3.80 (s, 3H), 3.77 (d, J=4.0 Hz, 6H);  $^{13}\text{C}$  NMR

(100 MHz, CDCl<sub>3</sub>)  $\delta$  160.6 (d, J=3.0 Hz), 136.4 (d, J=4.7 Hz), 116.0 (d, J=7.4 Hz), 115.1 (d, J=2.4 Hz), 55.4, 54.2 (d, J=6.1 Hz); <sup>31</sup>P NMR (162 MHz, CDCl<sub>3</sub>)  $\delta$  27.3; HRMS: m/z [M+H]<sup>+</sup> calcd for C<sub>9</sub>H<sub>14</sub>O<sub>4</sub>PS<sup>+</sup>: 249.0345; found: 249.0347.

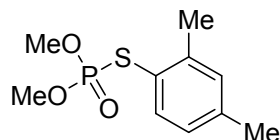

**3j**: Colorless oil; Yield: 64%; <sup>1</sup>H NMR (400 MHz, CDCl<sub>3</sub>)  $\delta$  7.43 (d, J=7.6 Hz, 1H), 7.06 (s, 1H), 6.96 (d, J=7.6 Hz, 1H), 3.78 (s, 3H), 3.75 (s, 3H), 2.46 (s, 3H), 2.28 (s, 3H); <sup>13</sup>C NMR (100 MHz, CDCl<sub>3</sub>)  $\delta$  142.2 (d, J=5.2 Hz), 139.9 (d, J=3.4 Hz), 136.3 (d, J=4.1 Hz), 131.9 (d, J=2.8 Hz), 127.8 (d, J=2.8 Hz), 121.5 (d, J=7.6 Hz), 54.3 (d, J=6.5 Hz), 21.3, 21.1; <sup>31</sup>P NMR (162 MHz, CDCl<sub>3</sub>)  $\delta$  26.9; HRMS: m/z [M+H]<sup>+</sup> calcd for C<sub>10</sub>H<sub>16</sub>O<sub>3</sub>PS<sup>+</sup>: 247.0552; found: 247.0557.

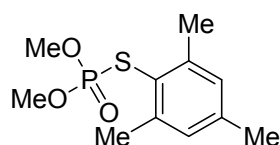

**3k**: Colorless oil; Yield: 54%; <sup>1</sup>H NMR (400 MHz, CDCl<sub>3</sub>)  $\delta$  6.94 (s, 2H), 3.77 (s, 3H), 3.74 (s, 3H), 2.53 (s, 6H), 2.25 (d, J=2.0 Hz, 3H); <sup>13</sup>C NMR (100 MHz, CDCl<sub>3</sub>)  $\delta$  143.9 (d, J=4.6 Hz), 139.6 (d, J=3.8 Hz), 129.5 (d, J=3.3 Hz), 120.7 (d, J=7.9 Hz), 54.4 (d, J=7.2 Hz), 22.4, 21.0; <sup>31</sup>P NMR (162 MHz, CDCl<sub>3</sub>)  $\delta$  26.7; HRMS: m/z [M+H]<sup>+</sup> calcd for C<sub>11</sub>H<sub>18</sub>O<sub>3</sub>PS<sup>+</sup>: 261.0709; found: 261.0714.

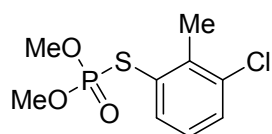

**3l**: Colorless oil; Yield: 69%; <sup>1</sup>H NMR (400 MHz, CDCl<sub>3</sub>)  $\delta$  7.51 (d, J=7.8 Hz, 1H), 7.36 (d, J=8.0 Hz, 1H), 7.09 (t, J=8.0 Hz, 1H), 3.80 (s, 3H), 3.77 (s, 3H), 2.59 (s, 3H); <sup>13</sup>C NMR (100 MHz, CDCl<sub>3</sub>)  $\delta$  140.4 (d, J=5.3 Hz), 135.8 (d, J=3.0 Hz), 135.0 (d, J=4.2 Hz), 130.8 (d, J=3.1 Hz), 127.4 (d, J=7.4 Hz), 127.2 (d, J=2.8 Hz), 54.5 (d, J=6.6 Hz), 19.1; <sup>31</sup>P NMR (162 MHz, CDCl<sub>3</sub>)  $\delta$  25.8; HRMS: m/z [M+H]<sup>+</sup> calcd for C<sub>9</sub>H<sub>13</sub>ClO<sub>3</sub>PS<sup>+</sup>: 267.0006; found: 267.0009.

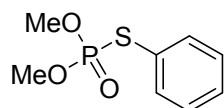

**3m**: Colorless oil; Yield: 80%;  $^1\text{H}$  NMR (400 MHz,  $\text{CDCl}_3$ )  $\delta$  7.55-7.53 (m, 2H), 7.35-7.33 (m, 2H), 3.81 (s, 3H), 3.78 (s, 3H);  $^{13}\text{C}$  NMR (100 MHz,  $\text{CDCl}_3$ )  $\delta$  134.5 (d,  $J=5.1$  Hz), 129.4 (d,  $J=2.2$  Hz), 129.1 (d,  $J=2.9$  Hz), 125.9 (d,  $J=7.0$  Hz), 54.2 (d,  $J=6.1$  Hz);  $^{31}\text{P}$  NMR (162 MHz,  $\text{CDCl}_3$ )  $\delta$  26.6; HRMS:  $m/z$   $[\text{M}+\text{H}]^+$  calcd for  $\text{C}_8\text{H}_{12}\text{O}_3\text{PS}^+$ : 219.0239; found: 219.0243.

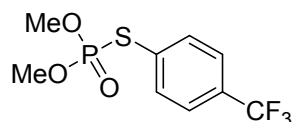

**3n**<sup>3a</sup>: Colorless oil; Yield: 76%;  $^1\text{H}$  NMR (400 MHz,  $\text{CDCl}_3$ )  $\delta$  7.68 (d,  $J=8.0$  Hz, 2H), 7.58 (d,  $J=8.4$  Hz, 2H), 3.84 (s, 3H), 3.80 (s, 3H);  $^{13}\text{C}$  NMR (100 MHz,  $\text{CDCl}_3$ )  $\delta$  134.4 (d,  $J=5.4$  Hz), 131.6-130.6 (m,  $J=32.8$  Hz, 2.7 Hz), 131.3 (d,  $J=3.0$  Hz), 126.3-126.2 (m), 123.7 (q,  $J=270.7$  Hz), 54.5 (d,  $J=6.2$  Hz);  $^{31}\text{P}$  NMR (162 MHz,  $\text{CDCl}_3$ )  $\delta$  25.1; HRMS:  $m/z$   $[\text{M}+\text{H}]^+$  calcd for  $\text{C}_9\text{H}_{11}\text{F}_3\text{O}_3\text{PS}^+$ : 287.0113; found: 287.0115.

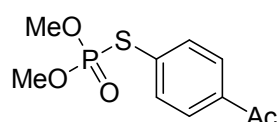

**3o**: Colorless oil; Yield: 60%;  $^1\text{H}$  NMR (400 MHz,  $\text{CDCl}_3$ )  $\delta$  7.88 (d,  $J=8.4$  Hz, 2H), 7.62 (dd,  $J=8.4$  Hz, 1.2 Hz, 2H), 3.81 (s, 3H), 3.78 (s, 3H), 2.56 (s, 3H);  $^{13}\text{C}$  NMR (100 MHz,  $\text{CDCl}_3$ )  $\delta$  197.2, 137.2 (d,  $J=2.5$  Hz), 134.1 (d,  $J=5.5$  Hz), 132.5 (d,  $J=7.0$  Hz), 129.1 (d,  $J=2.8$  Hz), 54.5 (d,  $J=6.2$  Hz), 26.6;  $^{31}\text{P}$  NMR (162 MHz,  $\text{CDCl}_3$ )  $\delta$  25.2; HRMS:  $m/z$   $[\text{M}+\text{H}]^+$  calcd for  $\text{C}_{10}\text{H}_{14}\text{O}_4\text{PS}^+$ : 261.0345; found: 261.0347.

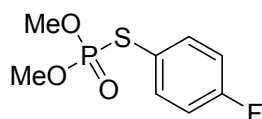

**3p**<sup>3a, 8</sup>: Colorless oil; Yield: 86%;  $^1\text{H}$  NMR (400 MHz,  $\text{CDCl}_3$ )  $\delta$  7.53-7.49 (m, 2H), 7.03 (t,  $J=8.4$  Hz, 2H), 3.80 (s, 3H), 3.77 (s, 3H);  $^{13}\text{C}$  NMR (100 MHz,  $\text{CDCl}_3$ )  $\delta$  163.3 (dd,  $J=248.7$  Hz, 3.3 Hz), 136.7 (dd,  $J=8.6$  Hz, 5.0 Hz), 121.0 (dd,  $J=7.3$  Hz, 3.4 Hz), 116.6 (dd,  $J=22.2$  Hz, 2.3 Hz), 54.2 (d,  $J=6.2$  Hz);  $^{31}\text{P}$  NMR (162 MHz,  $\text{CDCl}_3$ )  $\delta$  26.3 (d,  $J=5.0$  Hz); HRMS:  $m/z$   $[\text{M}+\text{H}]^+$  calcd for  $\text{C}_8\text{H}_{11}\text{FO}_3\text{PS}^+$ : 237.0145; found: 237.0147.

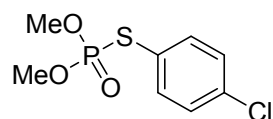

**3q**<sup>1,9</sup>: Colorless oil; Yield: 78%; <sup>1</sup>H NMR (400 MHz, CDCl<sub>3</sub>) δ 7.47 (dd, J=8.4 Hz, 1.6 Hz, 2H), 7.30 (d, J=8.4 Hz, 2H), 3.81 (s, 3H), 3.78 (s, 3H); <sup>13</sup>C NMR (100 MHz, CDCl<sub>3</sub>) δ 135.7 (d, J=5.2 Hz), 135.6 (d, J=3.6 Hz), 129.6 (d, J=2.3 Hz), 124.4 (d, J=7.2 Hz), 54.3 (d, J=6.2 Hz); <sup>31</sup>P NMR (162 MHz, CDCl<sub>3</sub>) δ 25.9; HRMS: m/z [M+H]<sup>+</sup> calcd for C<sub>8</sub>H<sub>11</sub>ClO<sub>3</sub>PS<sup>+</sup>: 252.9850; found: 252.9852.

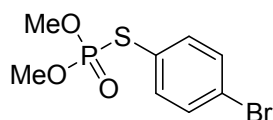

**3r**: Colorless oil; Yield: 76%; <sup>1</sup>H NMR (400 MHz, CDCl<sub>3</sub>) δ 7.46 (d, J=8.0 Hz, 2H), 7.40 (d, J=8.4 Hz, 2H), 3.81 (d, J=1.2 Hz, 3H), 3.78 (d, J=1.2 Hz, 3H); <sup>13</sup>C NMR (100 MHz, CDCl<sub>3</sub>) δ 134.3 (d, J=5.5 Hz), 131.2 (d, J=5.9 Hz), 130.8 (d, J=2.6 Hz), 126.14-126.08 (m), 54.4 (d, J=6.2 Hz); <sup>31</sup>P NMR (162 MHz, CDCl<sub>3</sub>) δ 25.7; HRMS: m/z [M+H]<sup>+</sup> calcd for C<sub>8</sub>H<sub>11</sub>BrO<sub>3</sub>PS<sup>+</sup>: 296.9344; found: 296.9345.

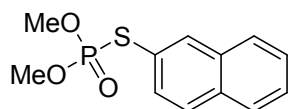

**3s**: Colorless oil; Yield: 72%; <sup>1</sup>H NMR (400 MHz, CDCl<sub>3</sub>) δ 8.08 (s, 1H), 7.82-7.79 (m, 3H), 7.59 (d, J=8.8 Hz, 1H), 7.52-7.49 (m, 2H), 3.85 (s, 3H), 3.81 (s, 3H); <sup>13</sup>C NMR (100 MHz, CDCl<sub>3</sub>) δ 134.4 (d, J=6.8 Hz), 133.5 (d, J=2.3 Hz), 133.0 (d, J=2.0 Hz), 130.8 (d, J=3.9 Hz), 129.1 (d, J=1.7 Hz), 127.7, 127.1 (d, J=1.0 Hz), 126.8, 123.1 (d, J=7.5 Hz), 54.3 (d, J=6.2 Hz); <sup>31</sup>P NMR (162 MHz, CDCl<sub>3</sub>) δ 26.6; HRMS: m/z [M+H]<sup>+</sup> calcd for C<sub>12</sub>H<sub>14</sub>O<sub>3</sub>PS<sup>+</sup>: 269.0396; found: 269.0397.

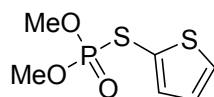

**3t**<sup>10</sup>: Colorless oil; Yield: 63%; <sup>1</sup>H NMR (400 MHz, CDCl<sub>3</sub>) δ 7.43-7.41 (m, 1H), 7.24-7.21 (m, 1H), 7.03 (dd, J= 5.3 Hz, 3.8 Hz, 1H), 3.85 (s, 3H), 3.82 (s, 3H); <sup>13</sup>C NMR (100 MHz, CDCl<sub>3</sub>) δ 136.3 (d, J= 6.5), 131.3 (d, J= 3.4), 127.9, 122.4 (d, J= 9.2), 54.4; <sup>31</sup>P NMR (162 MHz, CDCl<sub>3</sub>) δ 24.5; HRMS m/z (ESI) calcd for C<sub>6</sub>H<sub>10</sub>O<sub>3</sub>PS<sub>2</sub><sup>+</sup> [M+H]<sup>+</sup>: 224.9803; found: 224.9805.

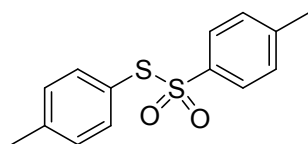

**4a**<sup>11</sup>: White solid, mp 77–78°C; <sup>1</sup>H NMR (400 MHz, CDCl<sub>3</sub>) δ 7.45 (d, J=8.0 Hz, 2H), 7.22 (t, J=8.4 Hz, 4H), 7.14 (d, J=8.0 Hz, 2H), 2.42 (s, 3H), 2.38 (s, 3H); <sup>13</sup>C NMR (100 MHz, CDCl<sub>3</sub>) δ 144.7, 142.1, 140.5, 136.6, 130.3, 129.4, 127.6, 124.6, 21.7, 21.6; HRMS m/z (ESI) calcd for C<sub>14</sub>H<sub>15</sub>O<sub>2</sub>S<sub>2</sub><sup>+</sup> [M+H]<sup>+</sup>: 279.0508; found: 279.0510.

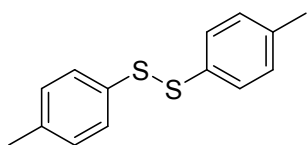

**4b**<sup>12</sup>: White solid, mp 44-45°C; <sup>1</sup>H NMR (400 MHz, CDCl<sub>3</sub>) δ 7.40 (d, J=8.0 Hz, 2H), 7.12 (t, J=8.0 Hz, 2H), 2.33 (s, 3H); <sup>13</sup>C NMR (100 MHz, CDCl<sub>3</sub>) δ 137.5, 133.9, 129.9, 128.6, 21.1.

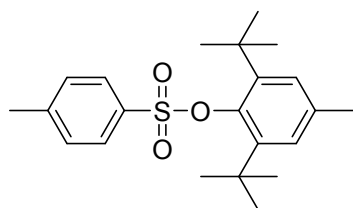

**5a**: White solid, mp 107-108°C; <sup>1</sup>H NMR (400 MHz, CDCl<sub>3</sub>) δ 7.44 (d, J=8.0 Hz, 2H), 7.21 (d, J=8.0 Hz, 2H), 6.73 (s, 2H), 2.40 (s, 3H), 1.31 (s, 21H); <sup>13</sup>C NMR (100 MHz, CDCl<sub>3</sub>) δ 154.2, 144.3, 136.0, 134.9, 129.3, 128.9, 127.7, 119.0, 34.1, 30.1, 21.6; HRMS m/z (ESI) calcd for C<sub>22</sub>H<sub>30</sub>NaO<sub>3</sub>S<sup>+</sup> [M+H]<sup>+</sup>: 397.1808; found: 397.1808.

## References

- 1 J. D. Ye, C. D. Barth, P. S. R. Anjaneyulu, T. Tuschld and J. A. Piccirilli, *Org. Biomol. Chem.*, 2007, **5**, 2491.
- 2 (a) K. Babak, A. Yaghoub, K. Jun-ya and Y. Tsutomu, *Synthesis*, 2013, **45**, 2323; (b) Z. J. Quan, R. G. Ren, Y. X. Da, Z. Zhang and X. C. Wang, *Heteroat. Chem.*, 2011, **22**, 653; (c) D. D. Liu, D.W. Chen and Z. C. Chen, *Synth. Commun.*, 1992, **22**, 2903; (d) L. L. Murdock and T. L. Hopkins, *J. Agric. and Food Chem.*, 1968, **16**, 954.
- 3 (a) Y. C. Liu and C. F. Lee, *Green Chem.*, 2014, **16**, 357; (b) Y. X. Gao, G. Tang, Y. Cao and Y. F. Zhao, *Synthesis*, 2009, **7**, 1081.
- 4 A. H. Lee and R. L. Metcalf, *Pestic. Biochem. and Physiol.*, 1973, **2**, 408.
- 5 K. Hiroshi, *Jpn. Tokyo Koho*, 1970, JP 45026974 B4 19700904.
- 6 S. Lach and D. Witt, *Synthesis*, 2011, **24**, 3975
- 7 R.W. Hoffmann, S. Goldmann, R. Gerlach and N. Maak, *Chem. Ber.*, 1980, **113**, 845.
- 8 K. Pilgram and F. Korte, *Tetrahedron*, 1965, **21**, 1999.
- 9 (a) F. Kaschani, S. Nickel, B. Pandey, B. F. Cravatt, M. Kaiser and A. L. Renier, *Bioorg. Med. Chem.*, 2012, **20**, 597; (b) C. M. Tice, *Pest Manage. Sci.*, 2002, **58**, 219.



- 10 P. Y. Johnson, R. Pan, J. Q. Wen and C. J. Halfman, *J. Org. Chem.*, 1981, **46**, 2049.
- 11 (a) M. Kirihara, S. Naito, Y. Nishimura, Y. Ishizuka, T. Iwai, H. Takeuchi, T. Ogata, H. Hanai, Y. Kinoshita, M. Kishida, K. Yamazaki, T. Noguchi and S. Yamashoji, *Tetrahedron*, 2014, **70**, 2464; (b) S. Iwata, M. Senoo, T. Hata and H. Urabe, *Heteroat. Chem.*, 2013, **24**, 336; (c) T. Cavattoni, T. Del Giacco, O. Lanzalunga, M. Mazzonna and P. Mencarelli, *J. Org. Chem.*, 2013, **78**, 4886; (d) F. L. Yang and S. K. Tian, *Angew. Chem. Int. Ed.*, 2013, **52**, 4929; (e) M. Abdo and S. Knapp, *J. Org. Chem.*, 2012, **77**, 3433; (f) K. Bahrami, M. M. Khodaei and D. Khaledian, *Tetrahedron Lett.*, 2012, **53**, 354; (g) M. Kirihara, S. Naito, Y. Ishizuka, H. Hanai and T. Noguchi, *Tetrahedron Lett.*, 2011, **52**, 3086; (h) S. Sobhani, S. Aryanejad and M. F. Maleki, *Synlett*, 2011, 319; (i) M. T. Cai, G. S. Lv, J. X. Chen, W. X. Gao, J. C. Ding and H. Y. Wu, *Chem. Lett.*, 2010, **39**, 368; (j) N. Iranpoor, H. Firouzabadi and A. R. Pourali, *Synlett*, 2004, 347; (k) Y. J. Liu and Y. M. Zhang, *Tetrahedron Lett.*, 2003, **44**, 4291.
- 12 (a) Y. F. Liao, P. C. Jiang, S. P. Chen, H. R. Qia and G. J. Deng, *Green Chem.*, 2013, **15**, 3302; (b) H. Y. Chen, W. T. Peng, Y. H. Lee, Y. L. Chang, Y. J. Chen, Y. C. Lai, N. Y. Jheng and H. Y. Chen, *Organometallics*, 2013, **32**, 5514; (c) Z. K. Li, F. Ke, H. Deng, H. L. Xu, H. F. Xiang and X. G. Zhou, *Org. Biomol. Chem.*, 2013, **11**, 2943; (d) F. L. Yang and S. K. Tian, *Angew. Chem. Int. Ed.*, 2013, **52**, 4929; (e) M. Abdo and S. Knapp, *J. Org. Chem.*, 2012, **77**, 3433.

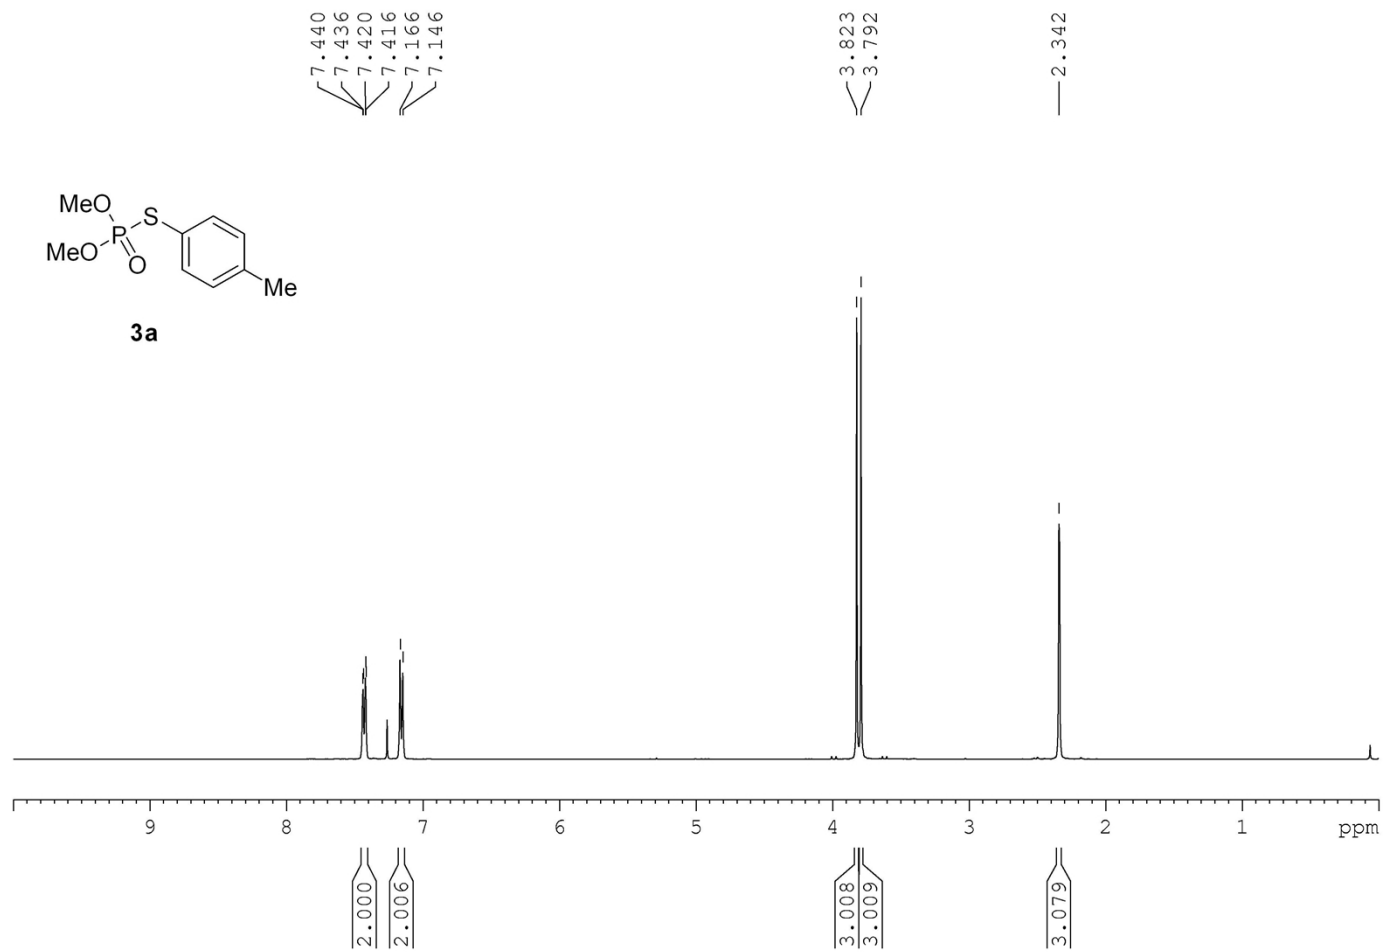

**<sup>1</sup>H NMR spectrum of compound 3a**

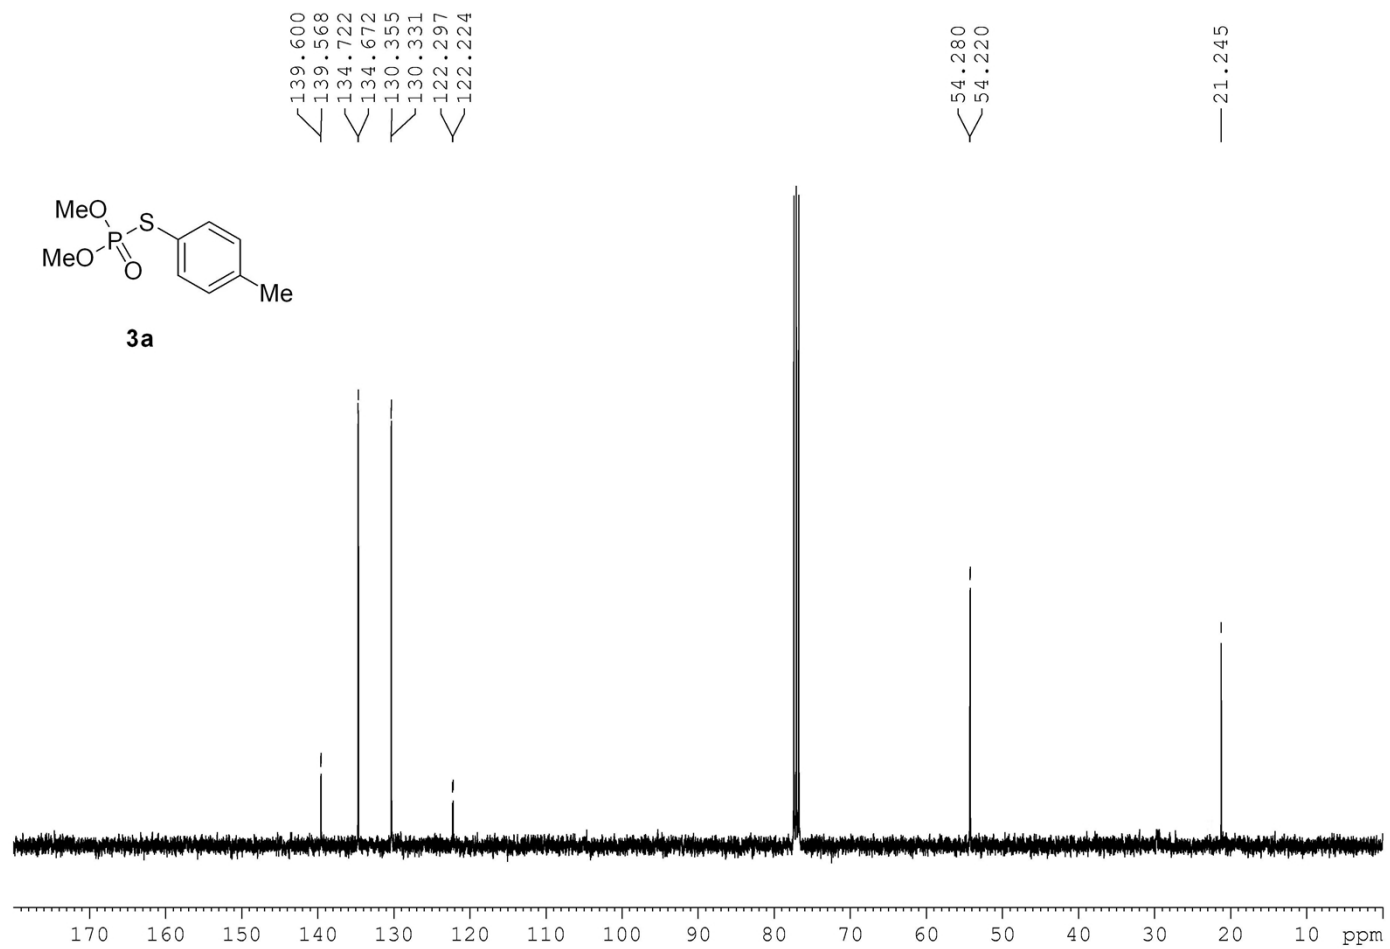

**<sup>13</sup>C NMR spectrum of compound 3a**

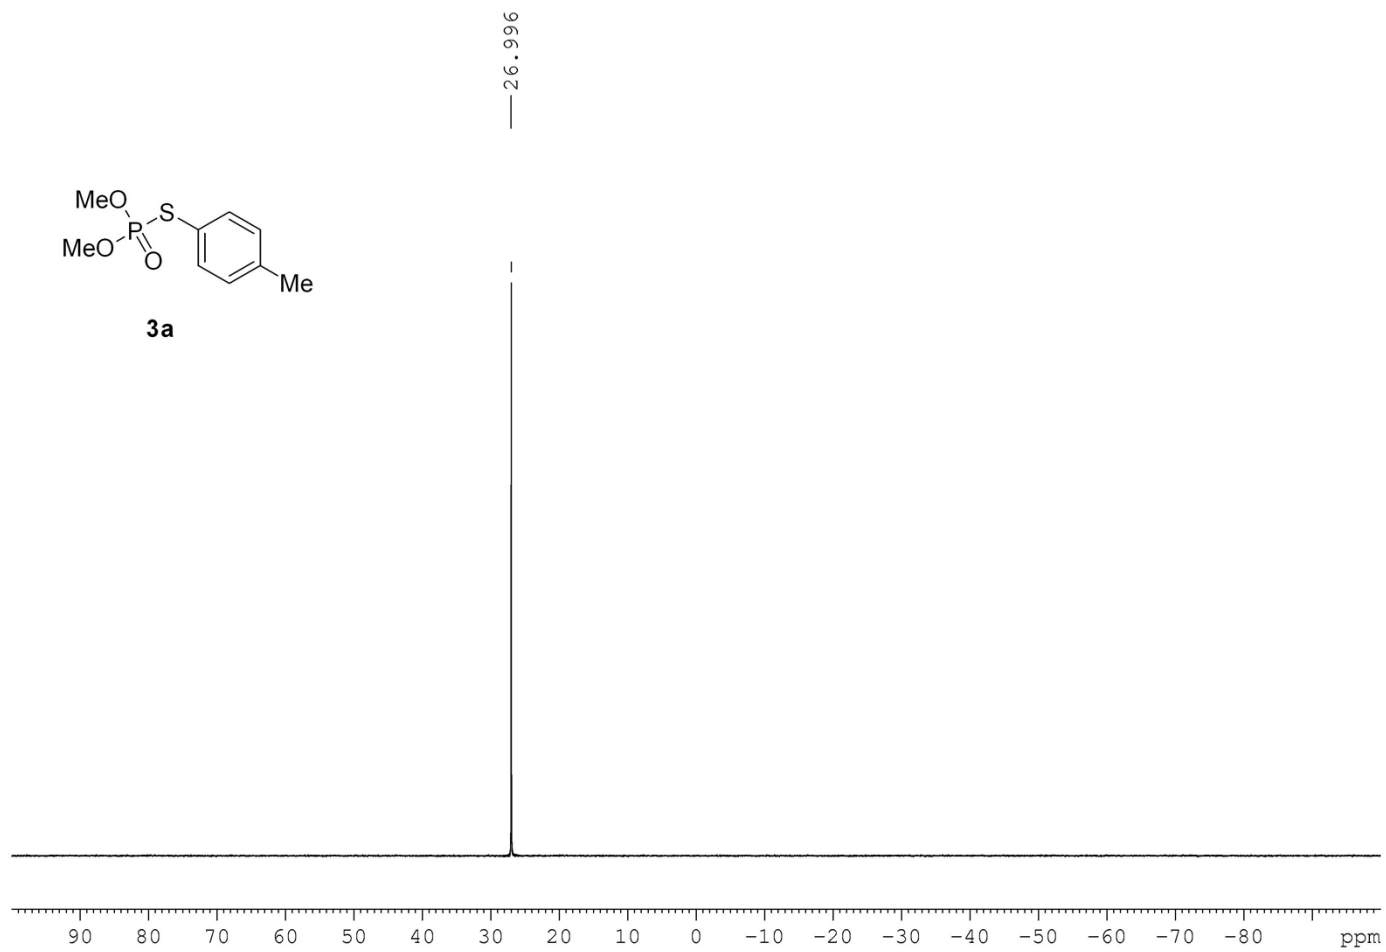

$^{31}\text{P}$  NMR spectrum of compound **3a**

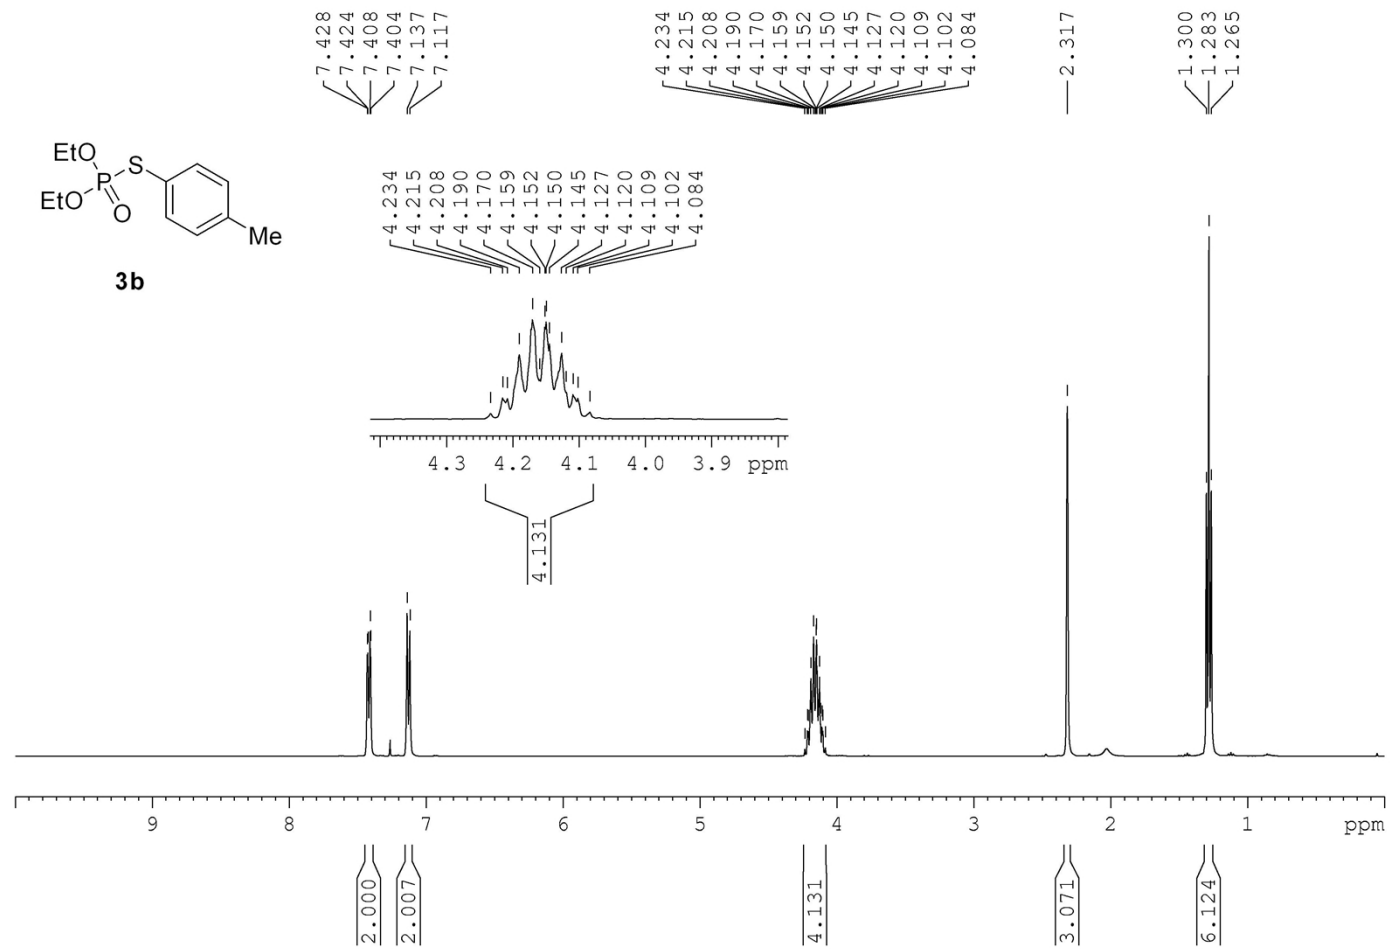

<sup>1</sup>H NMR spectrum of compound **3b**

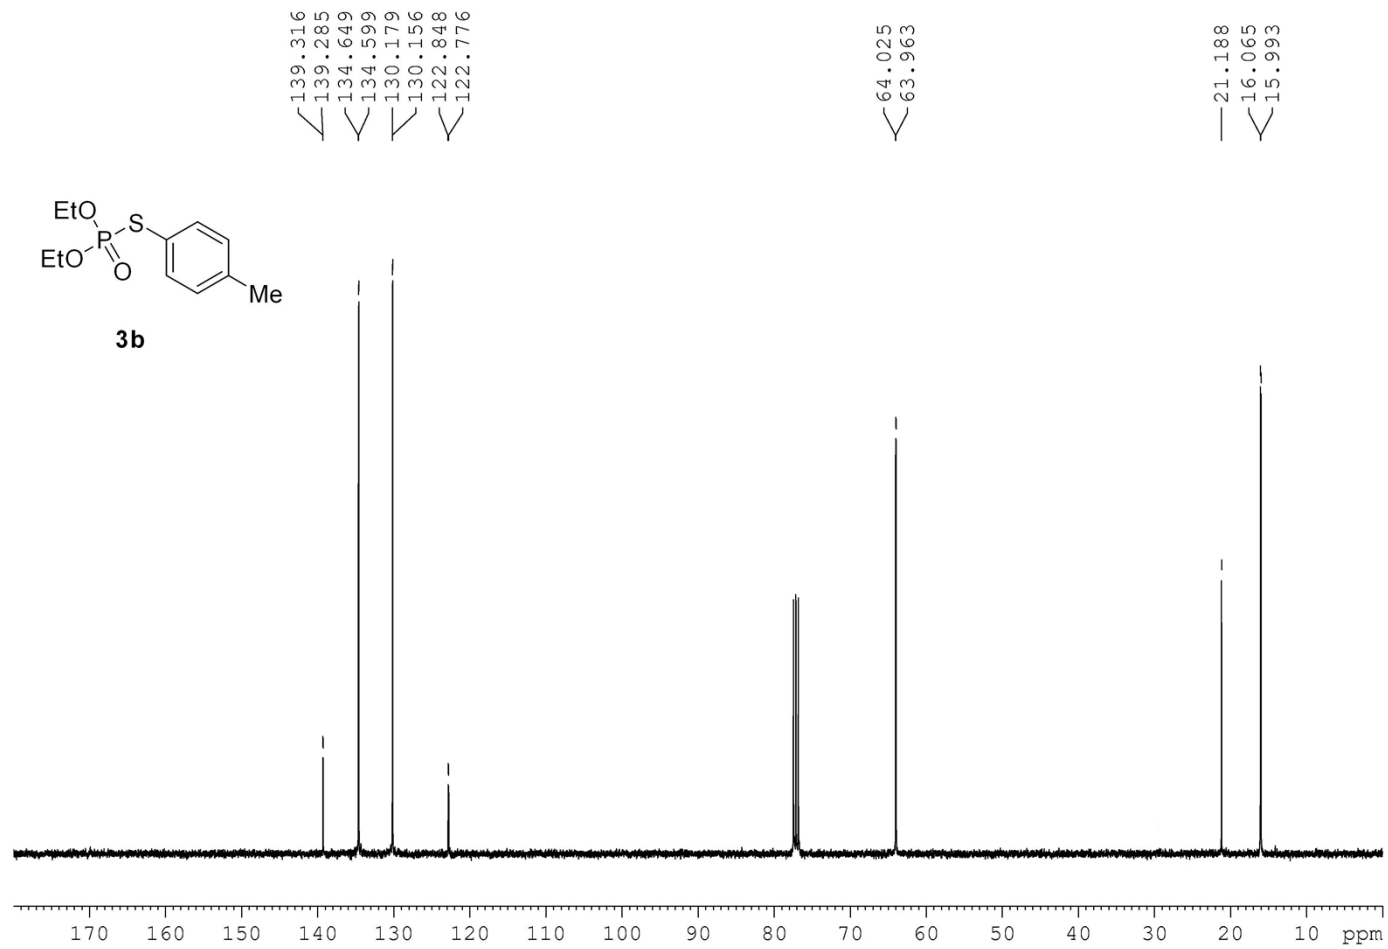

$^{13}\text{C}$  NMR spectrum of compound **3b**

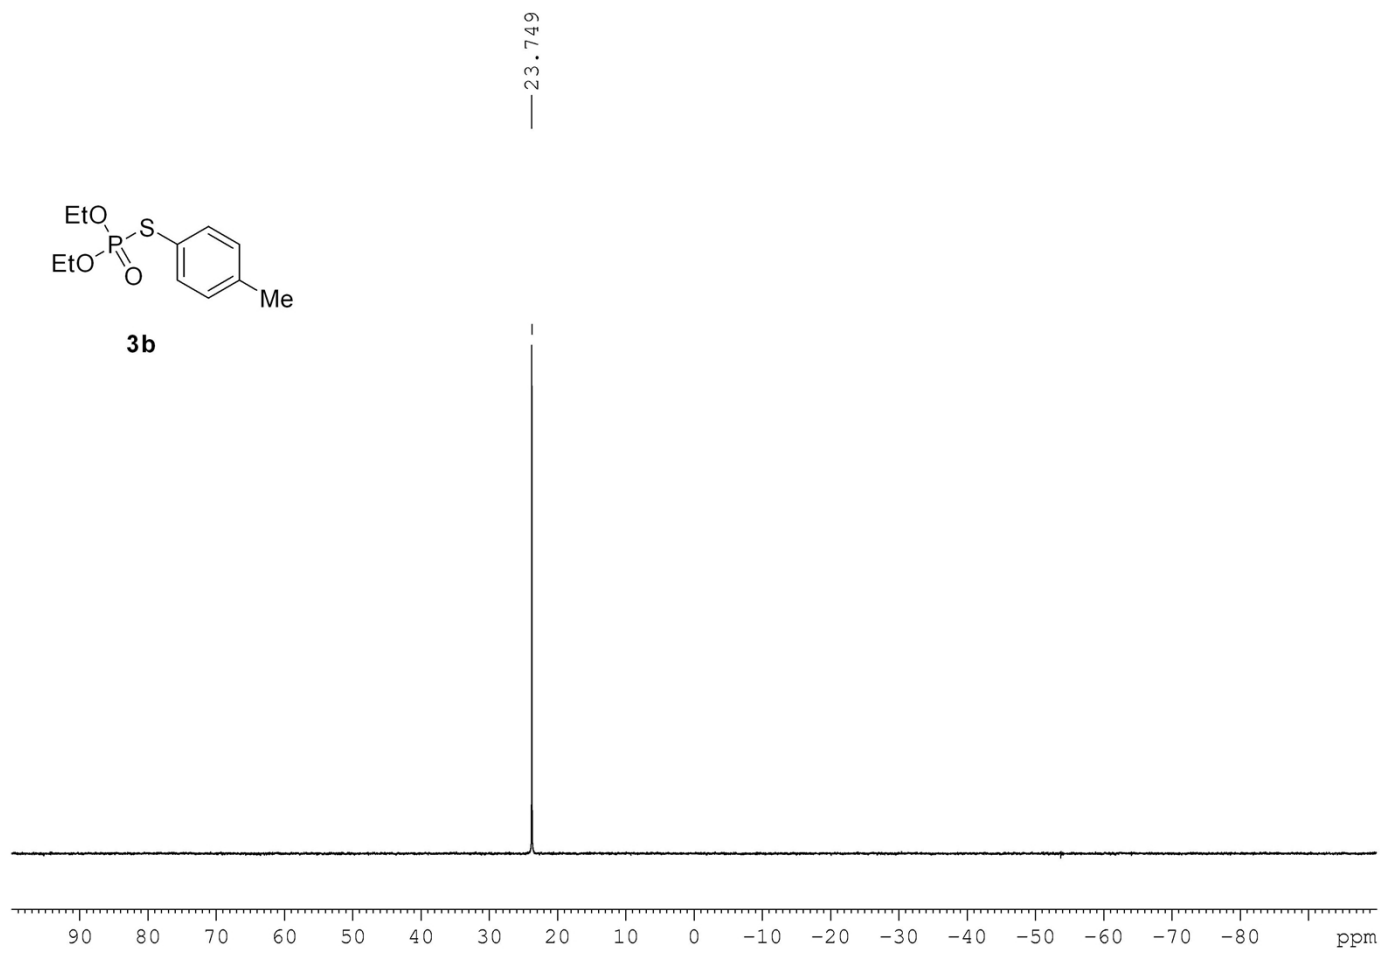

$^{31}\text{P}$  NMR spectrum of compound **3b**

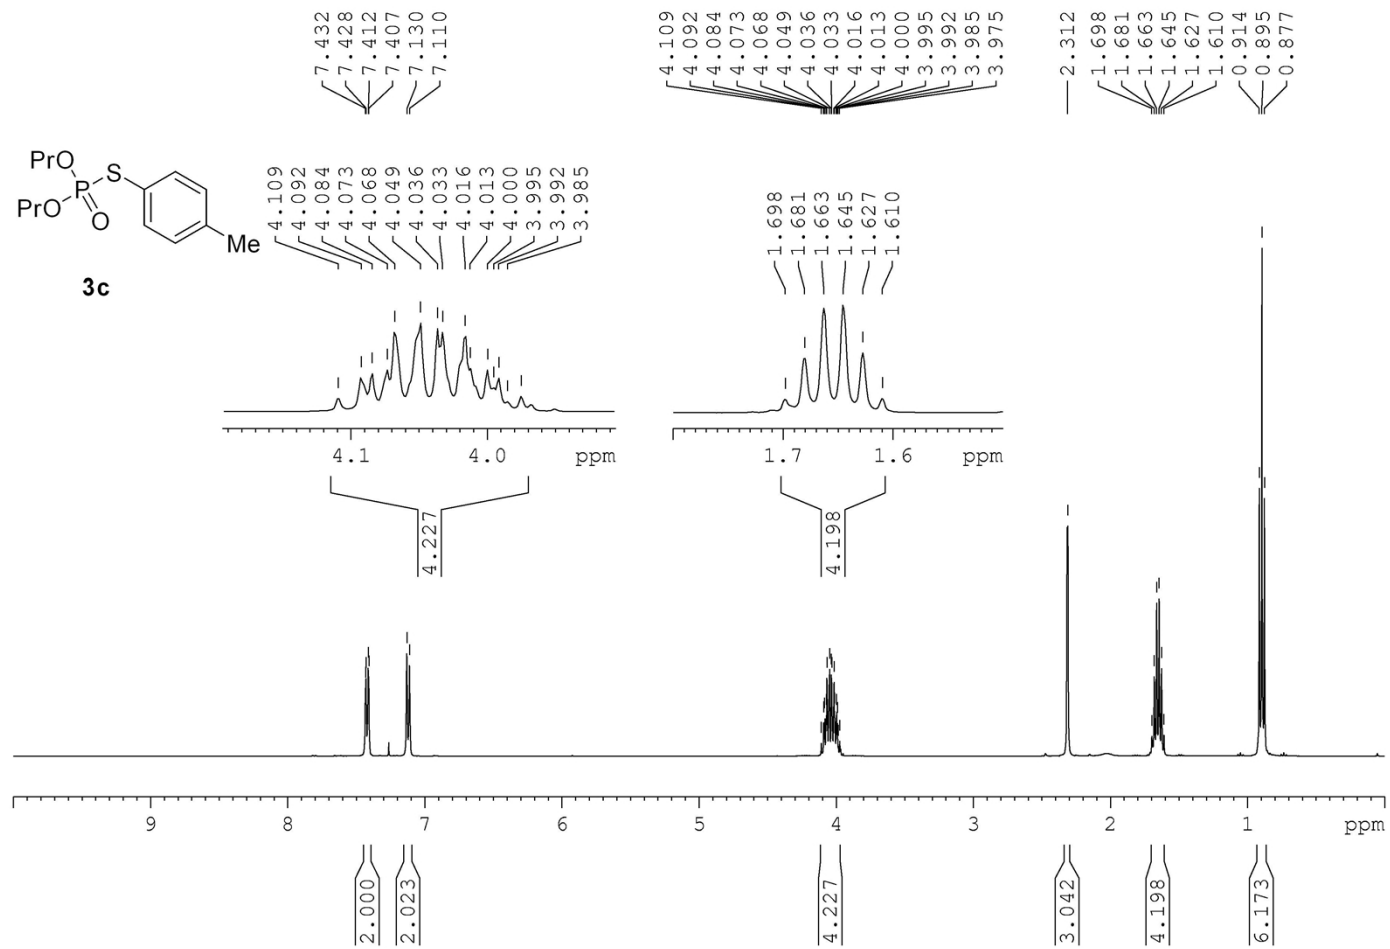

$^1\text{H}$  NMR spectrum of compound **3c**



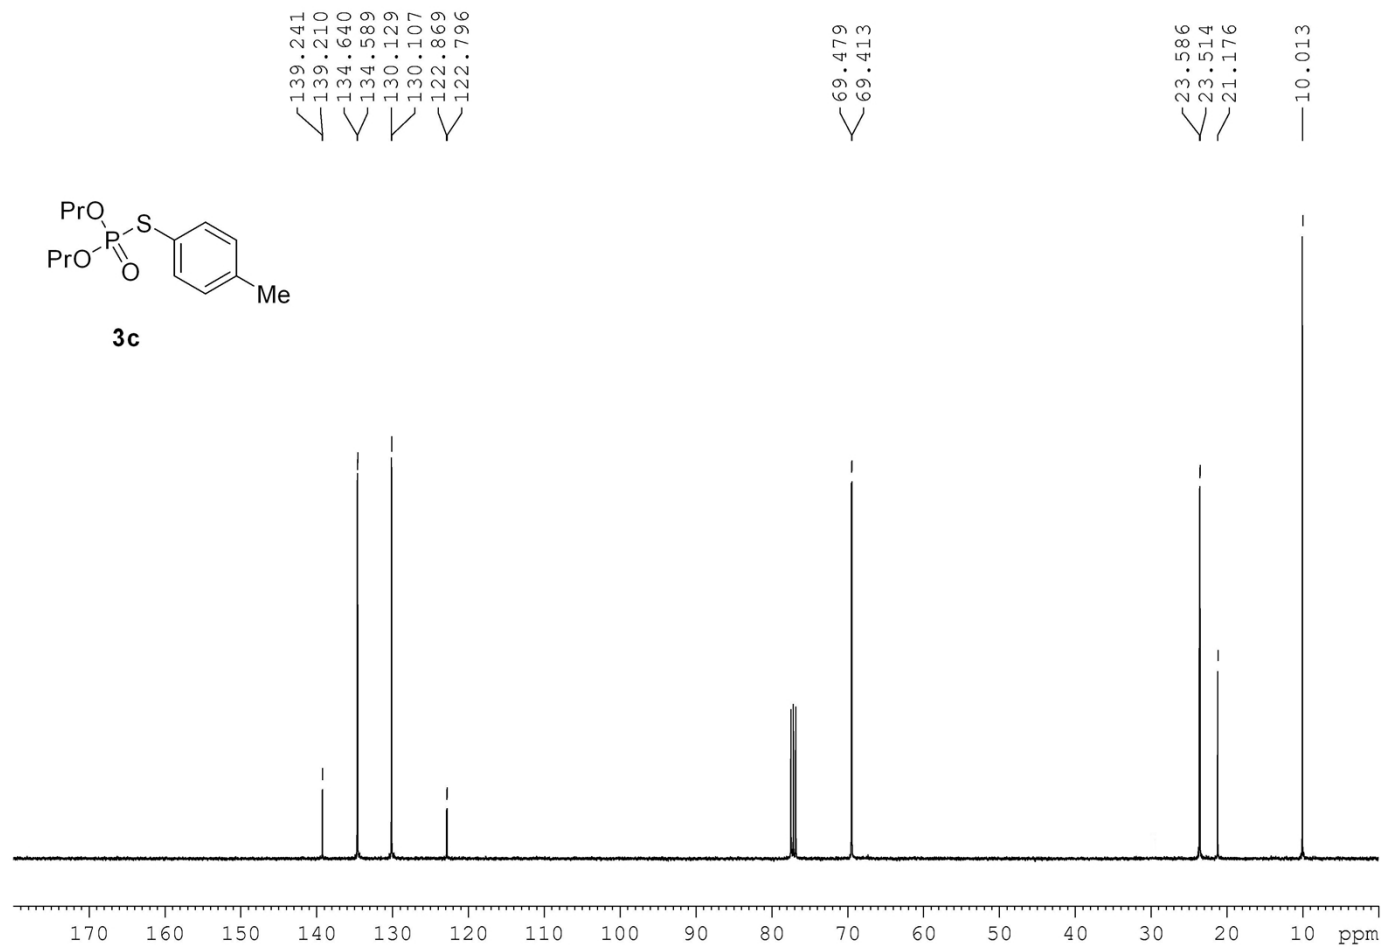

<sup>13</sup>C NMR spectrum of compound **3c**

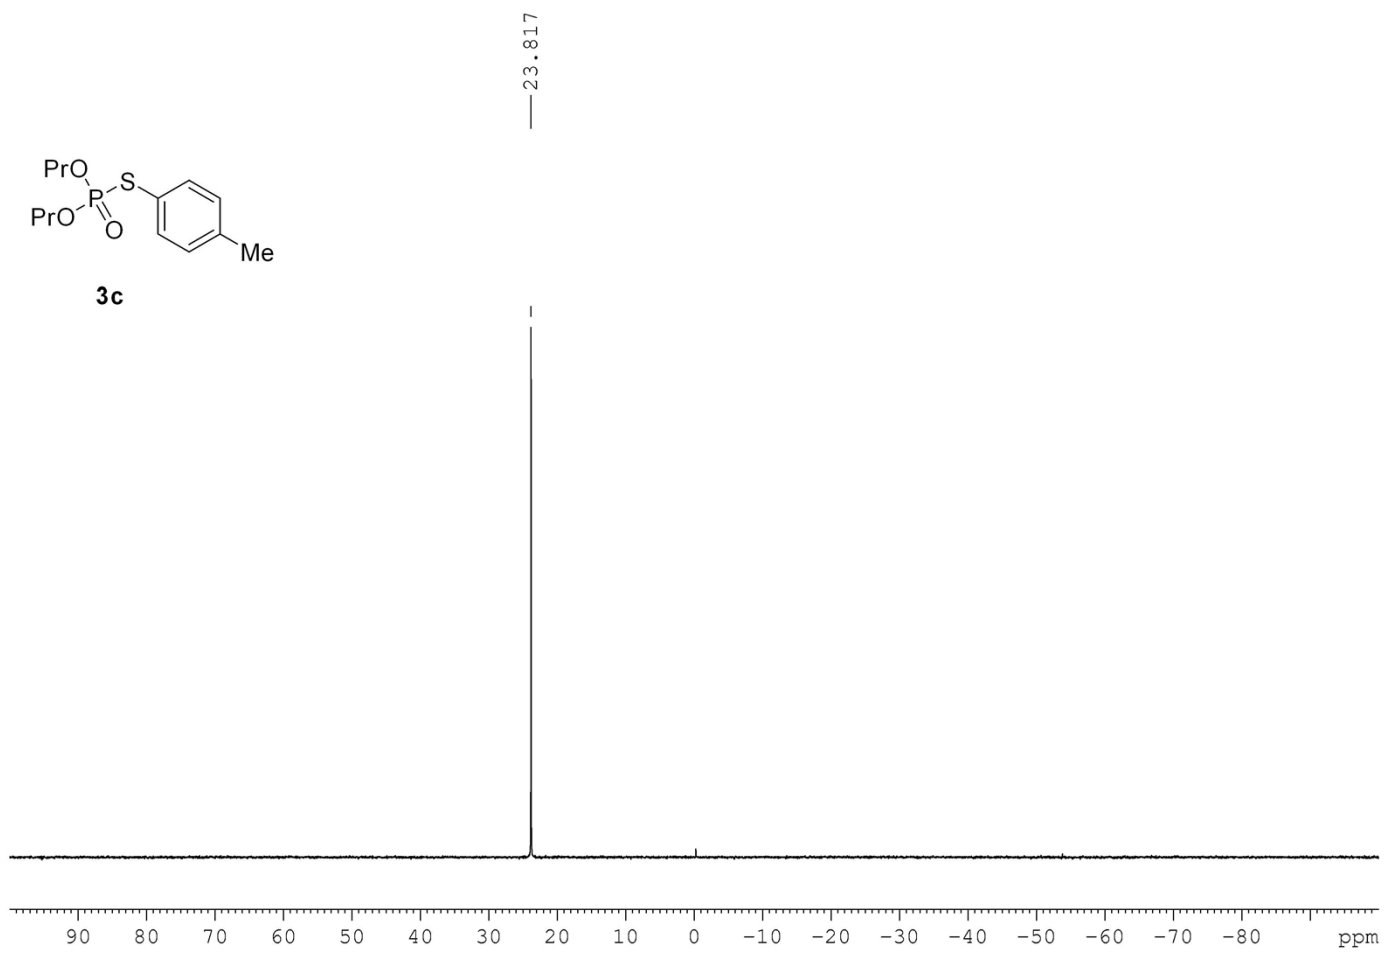

$^{31}\text{P}$  NMR spectrum of compound **3c**

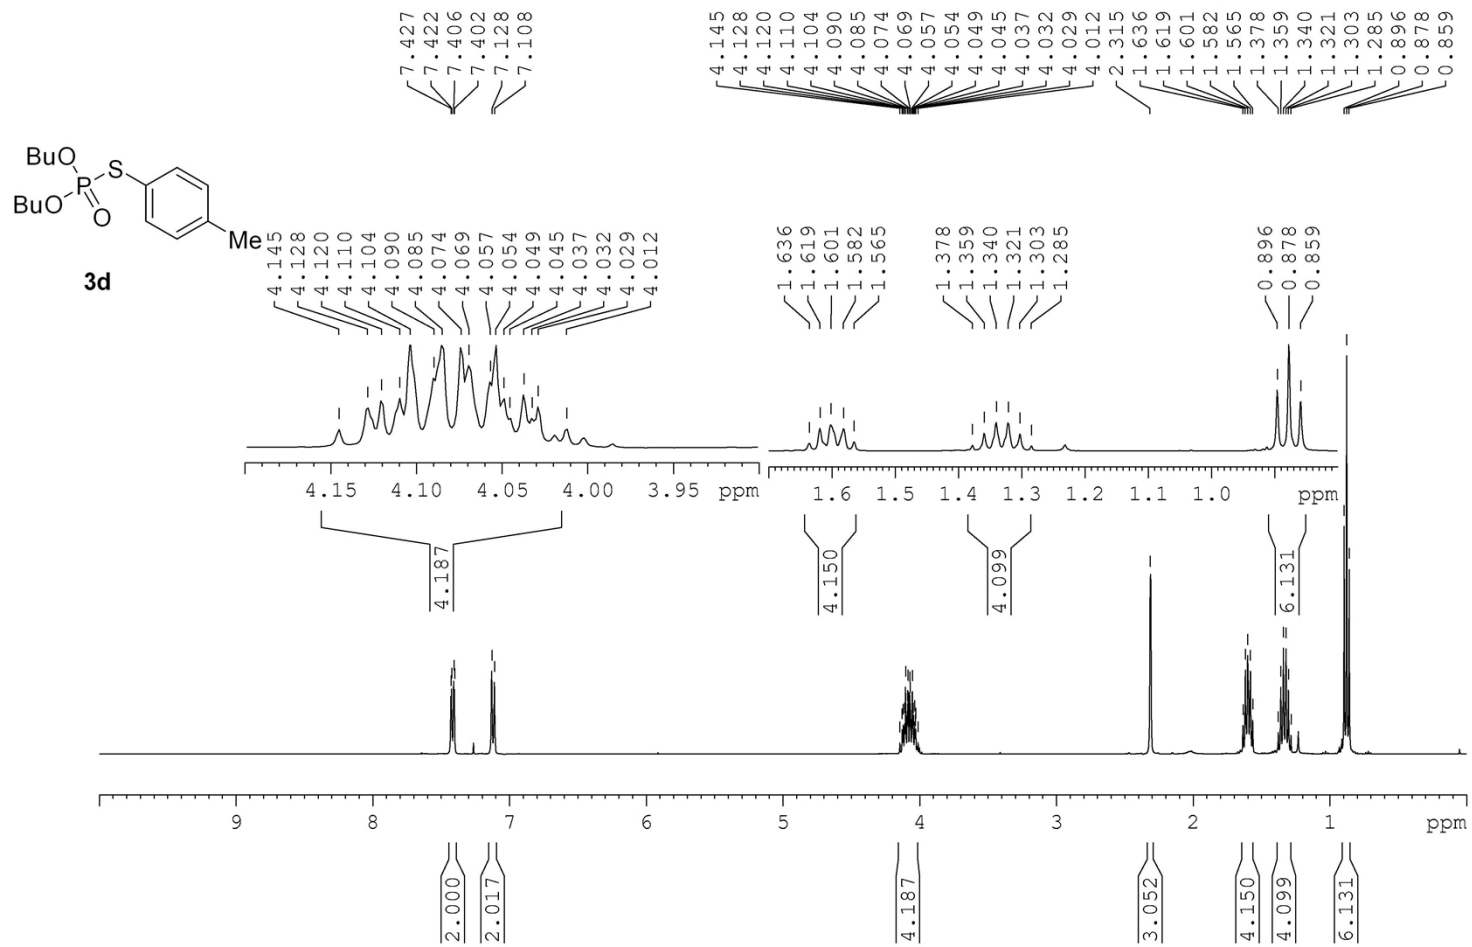

<sup>1</sup>H NMR spectrum of compound **3d**

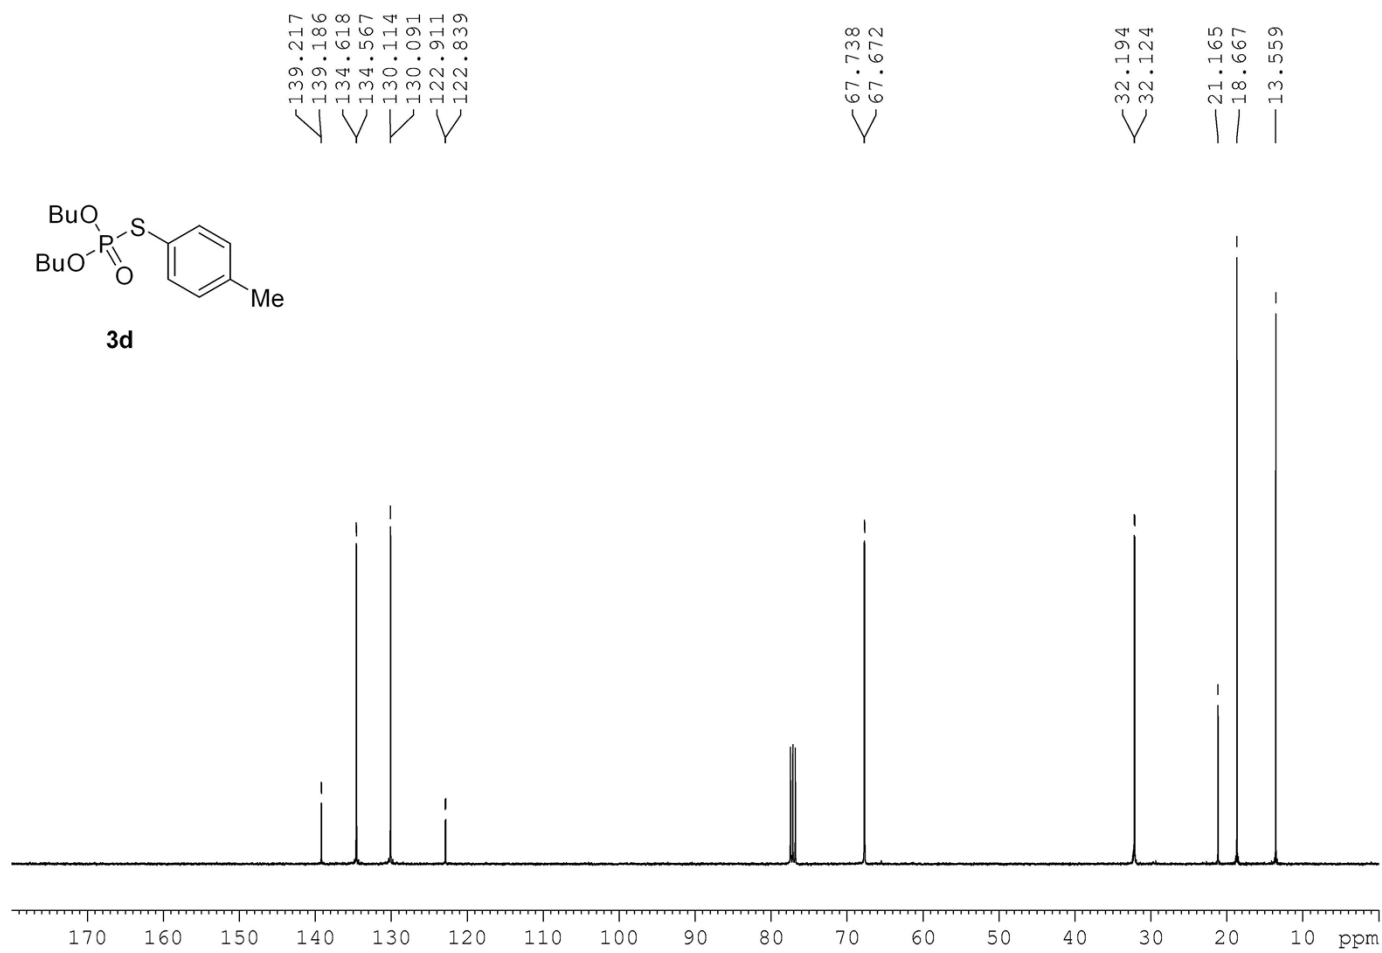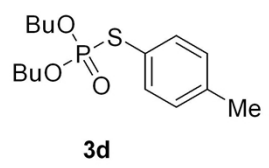

<sup>13</sup>C NMR spectrum of compound **3d**

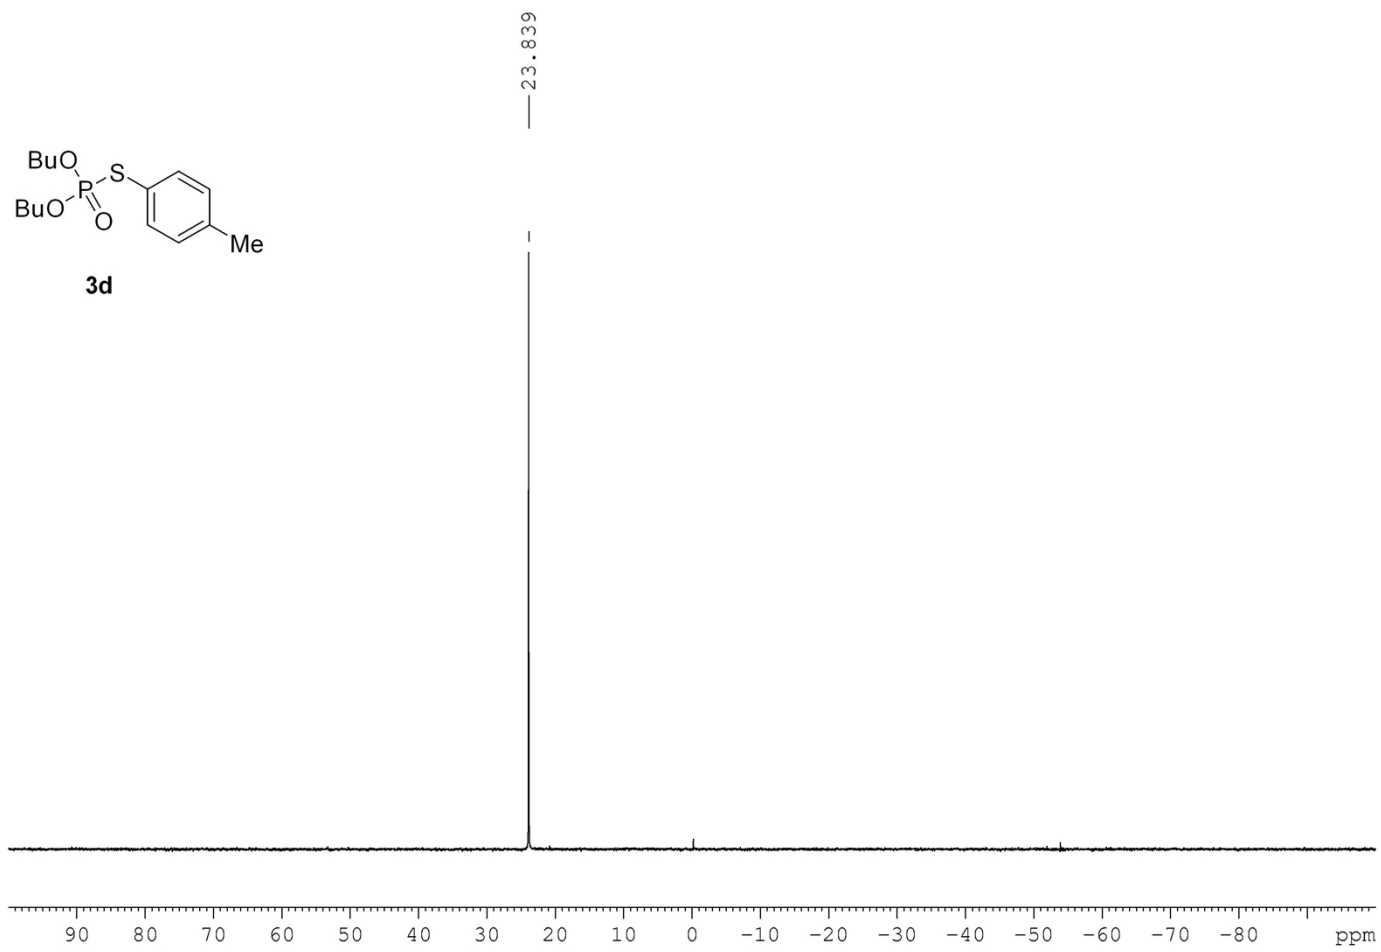

$^{31}\text{P}$  NMR spectrum of compound **3d**

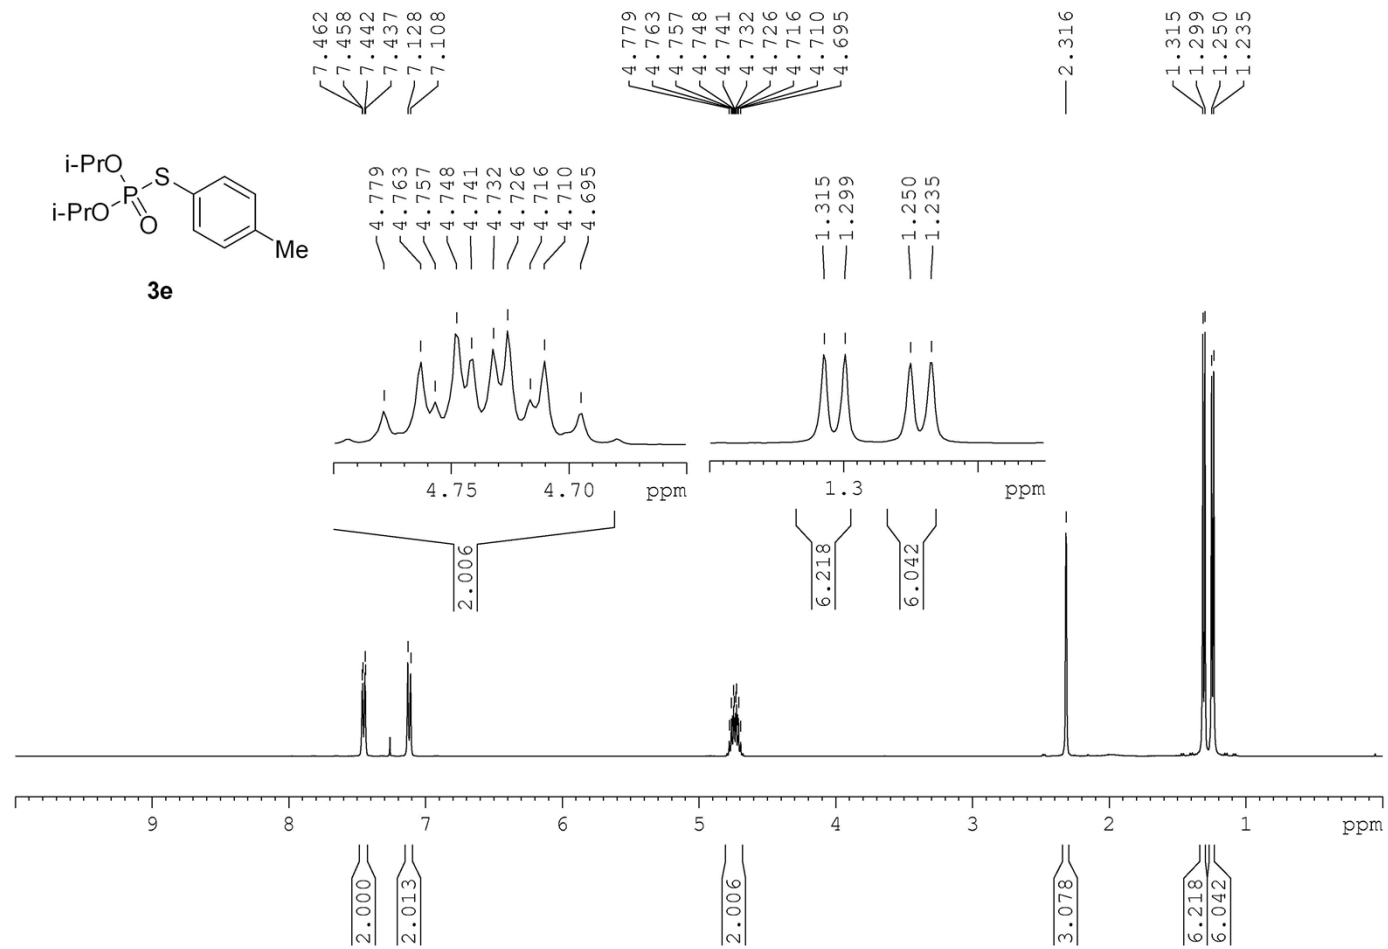

<sup>1</sup>H NMR spectrum of compound **3e**

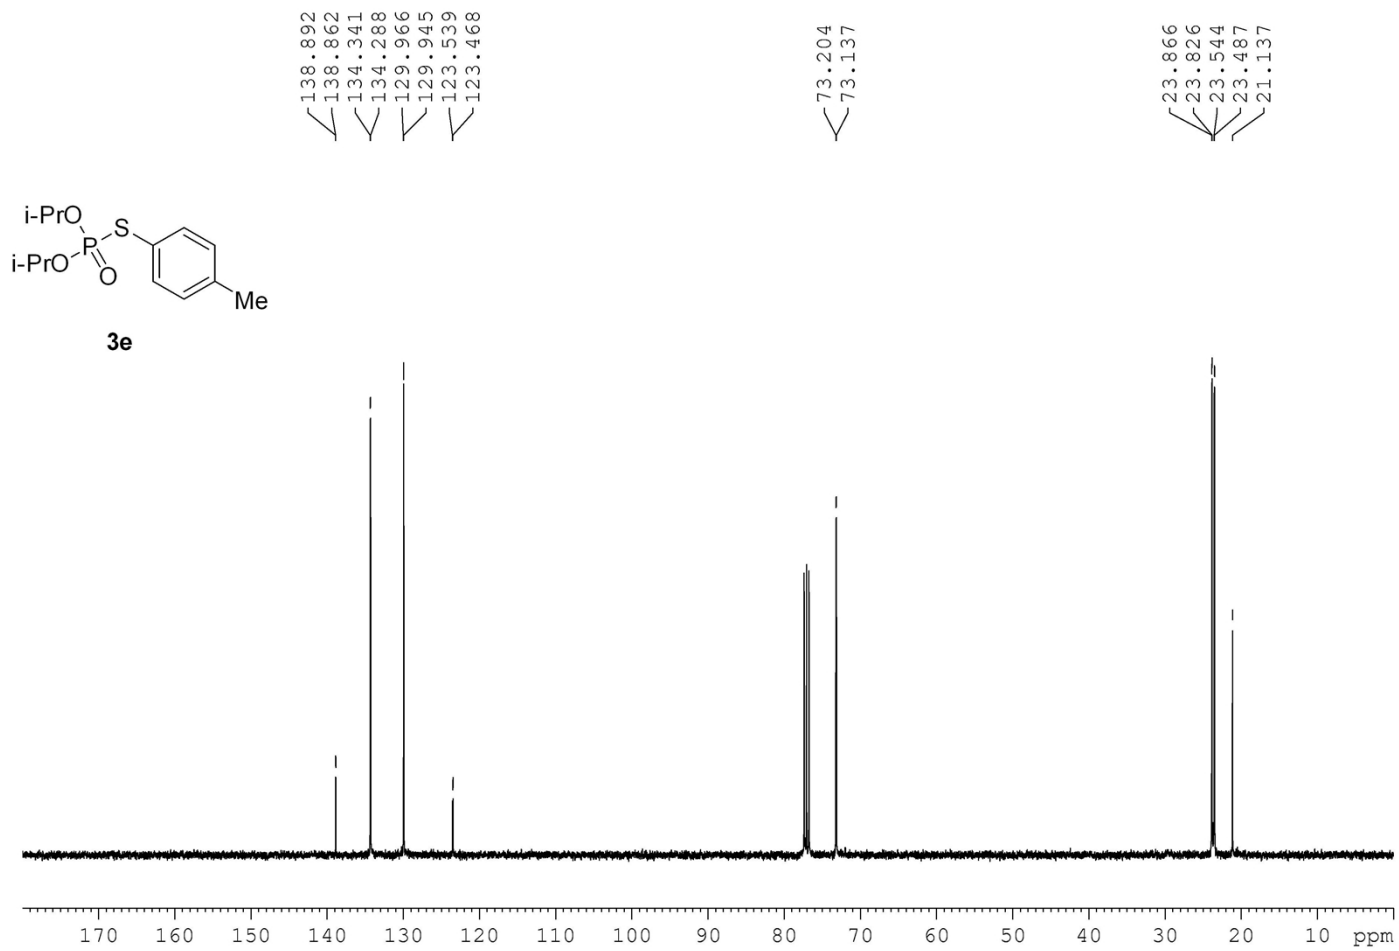

$^{13}\text{C}$  NMR spectrum of compound **3e**

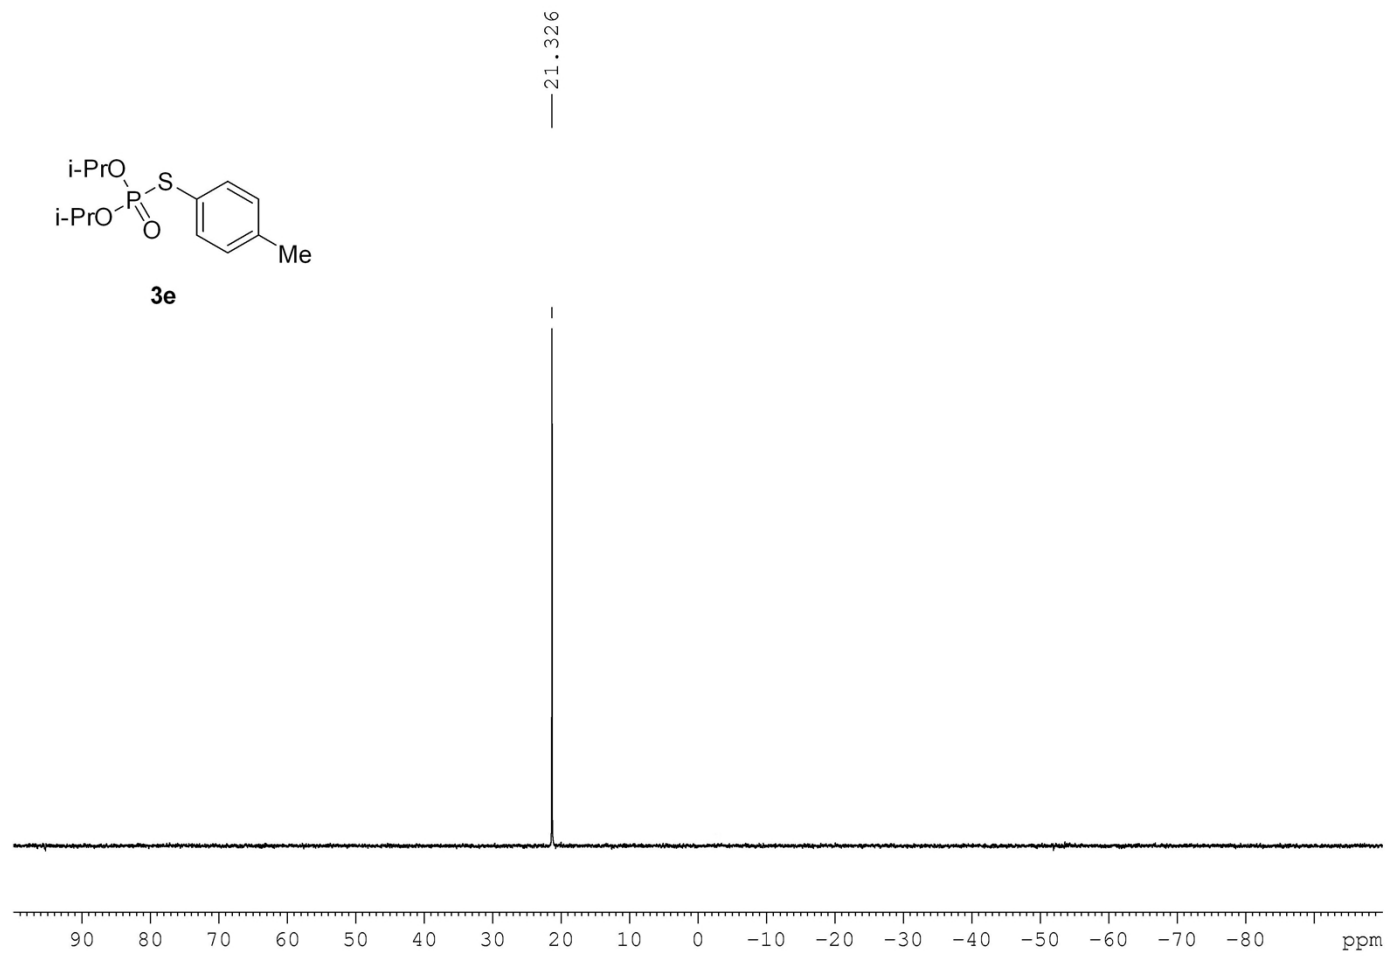

$^{31}\text{P}$  NMR spectrum of compound **3e**



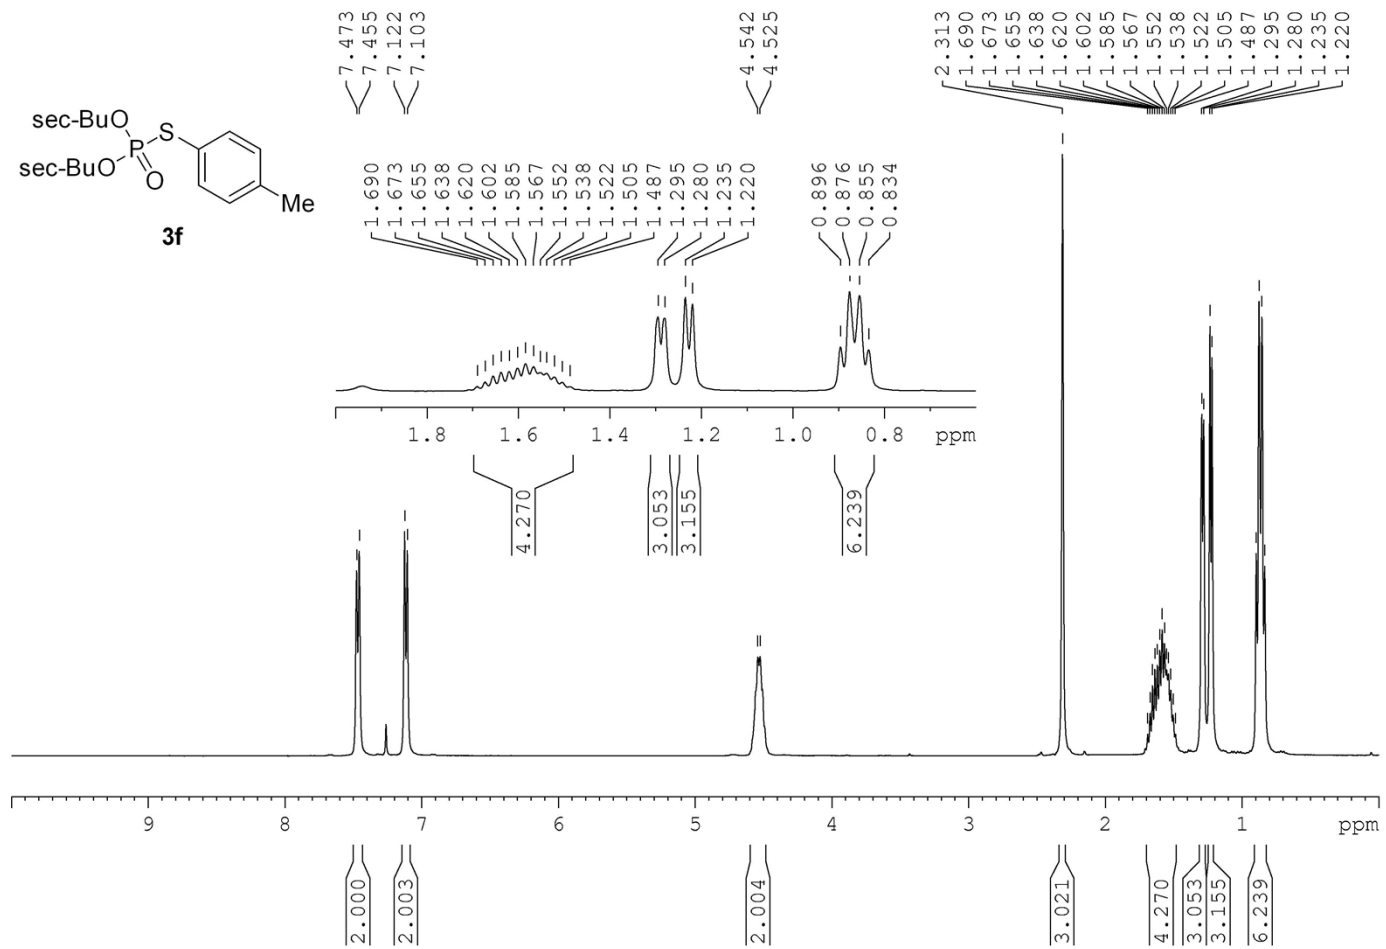

<sup>1</sup>H NMR spectrum of compound **3f**

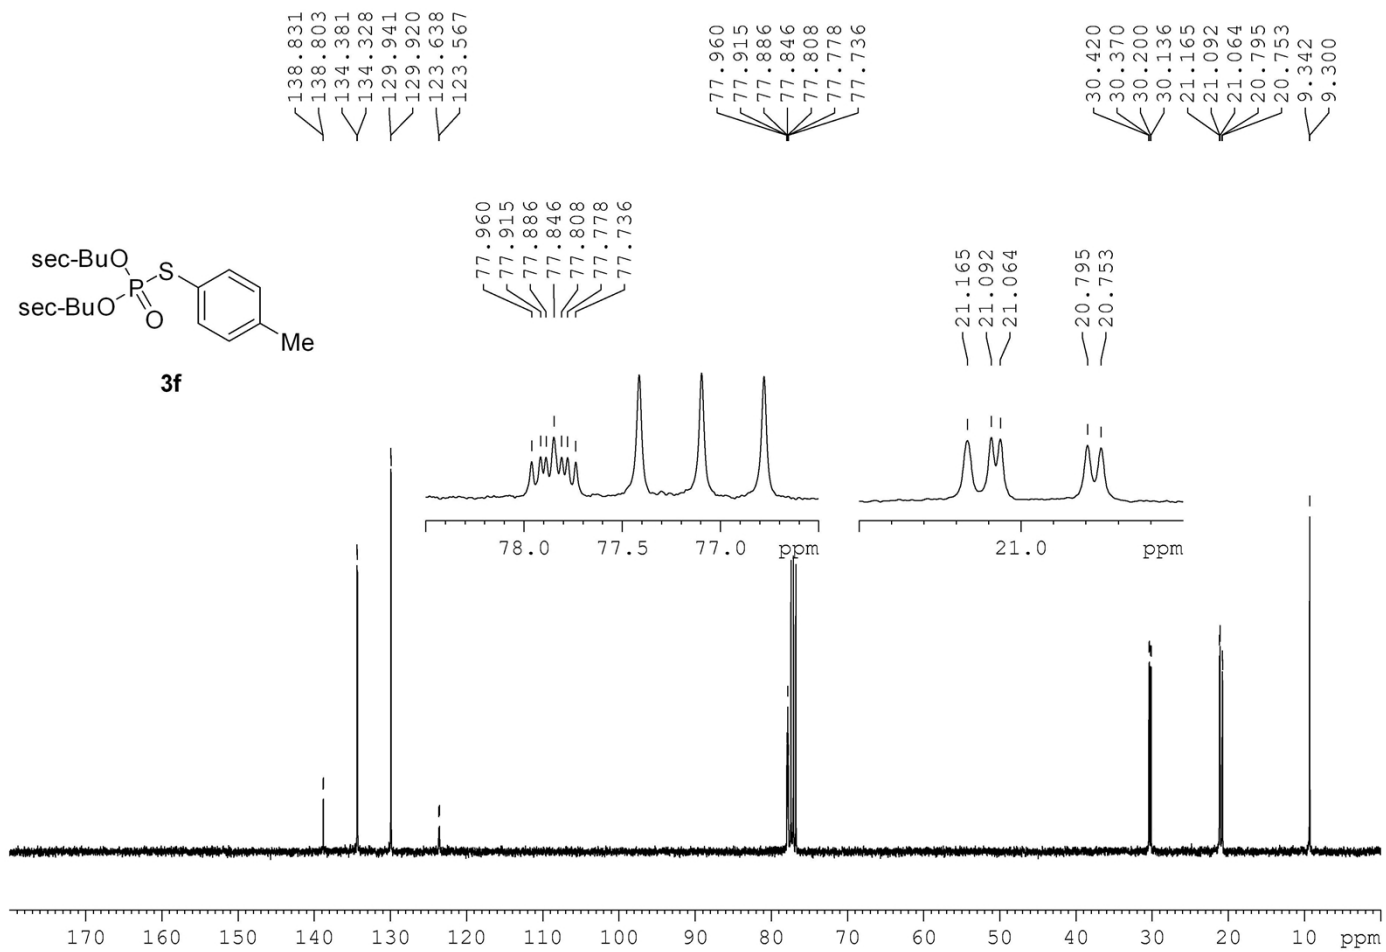

<sup>13</sup>C NMR spectrum of compound **3f**

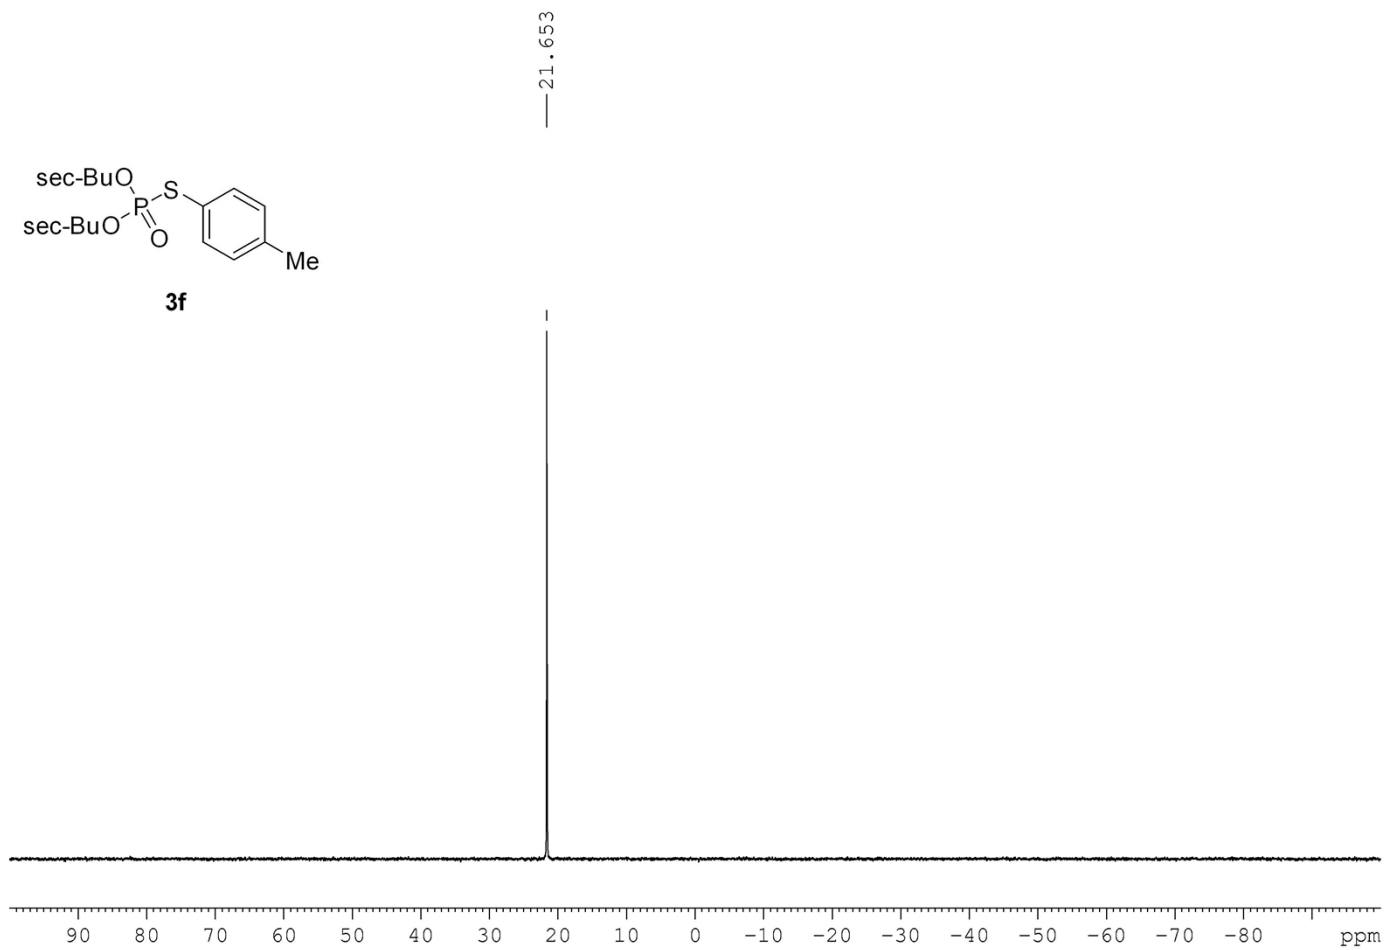

$^{31}\text{P}$  NMR spectrum of compound **3f**

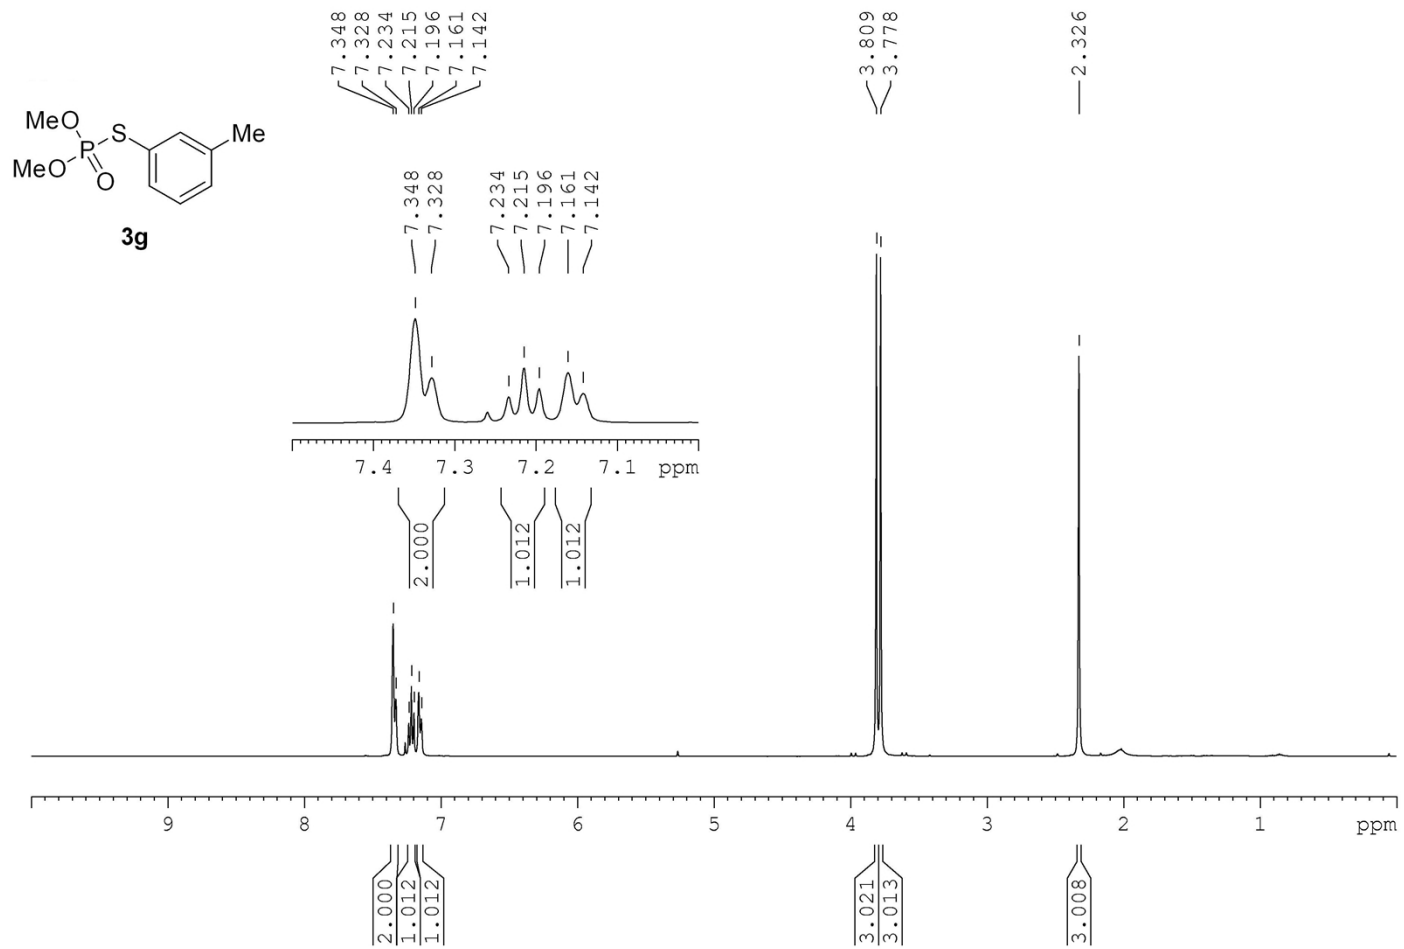

<sup>1</sup>H NMR spectrum of compound **3g**

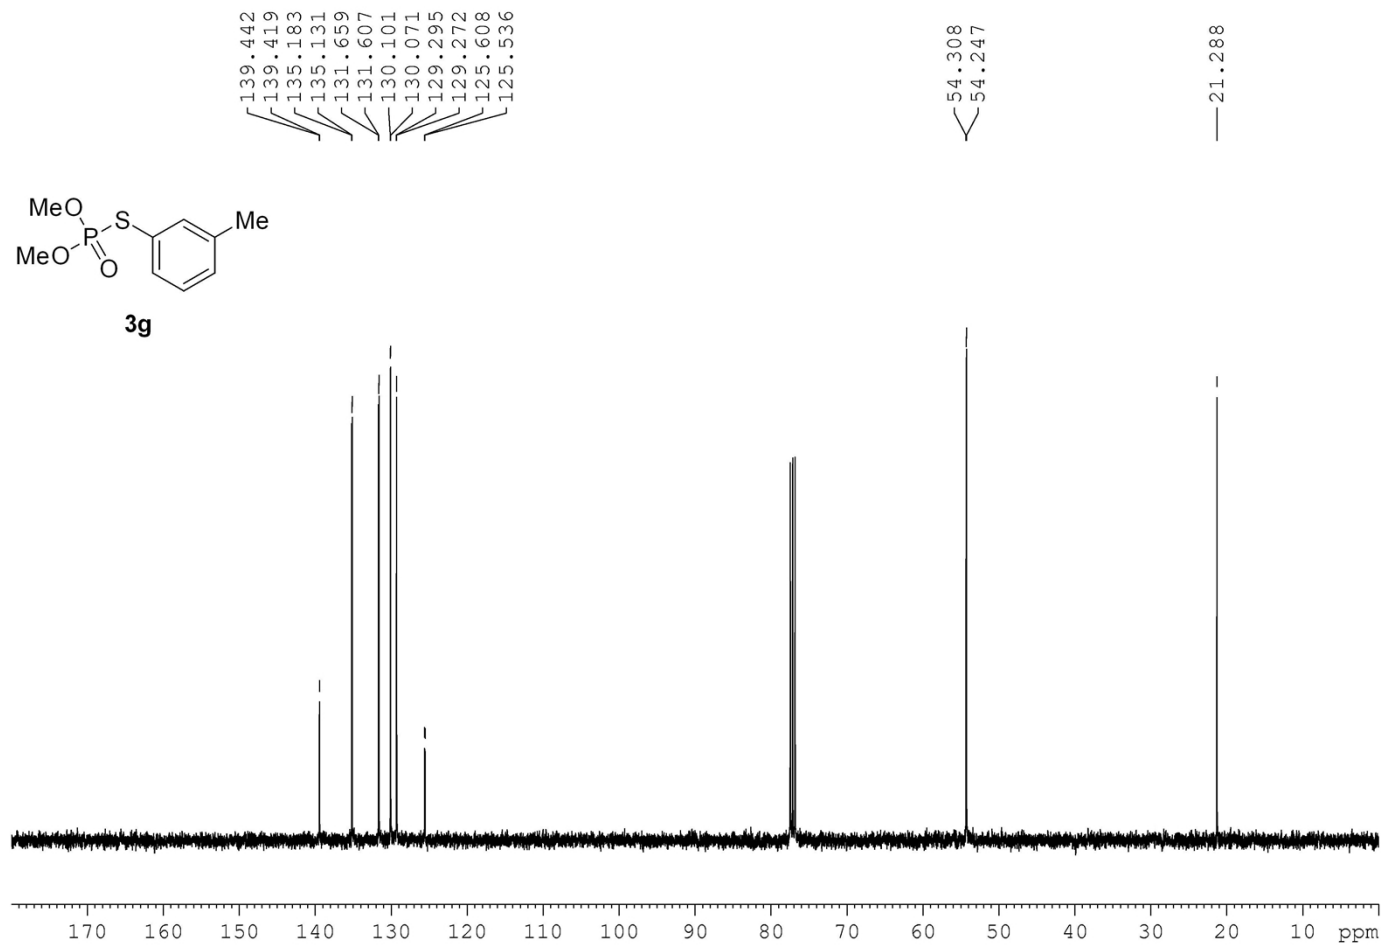

$^{13}\text{C}$  NMR spectrum of compound **3g**

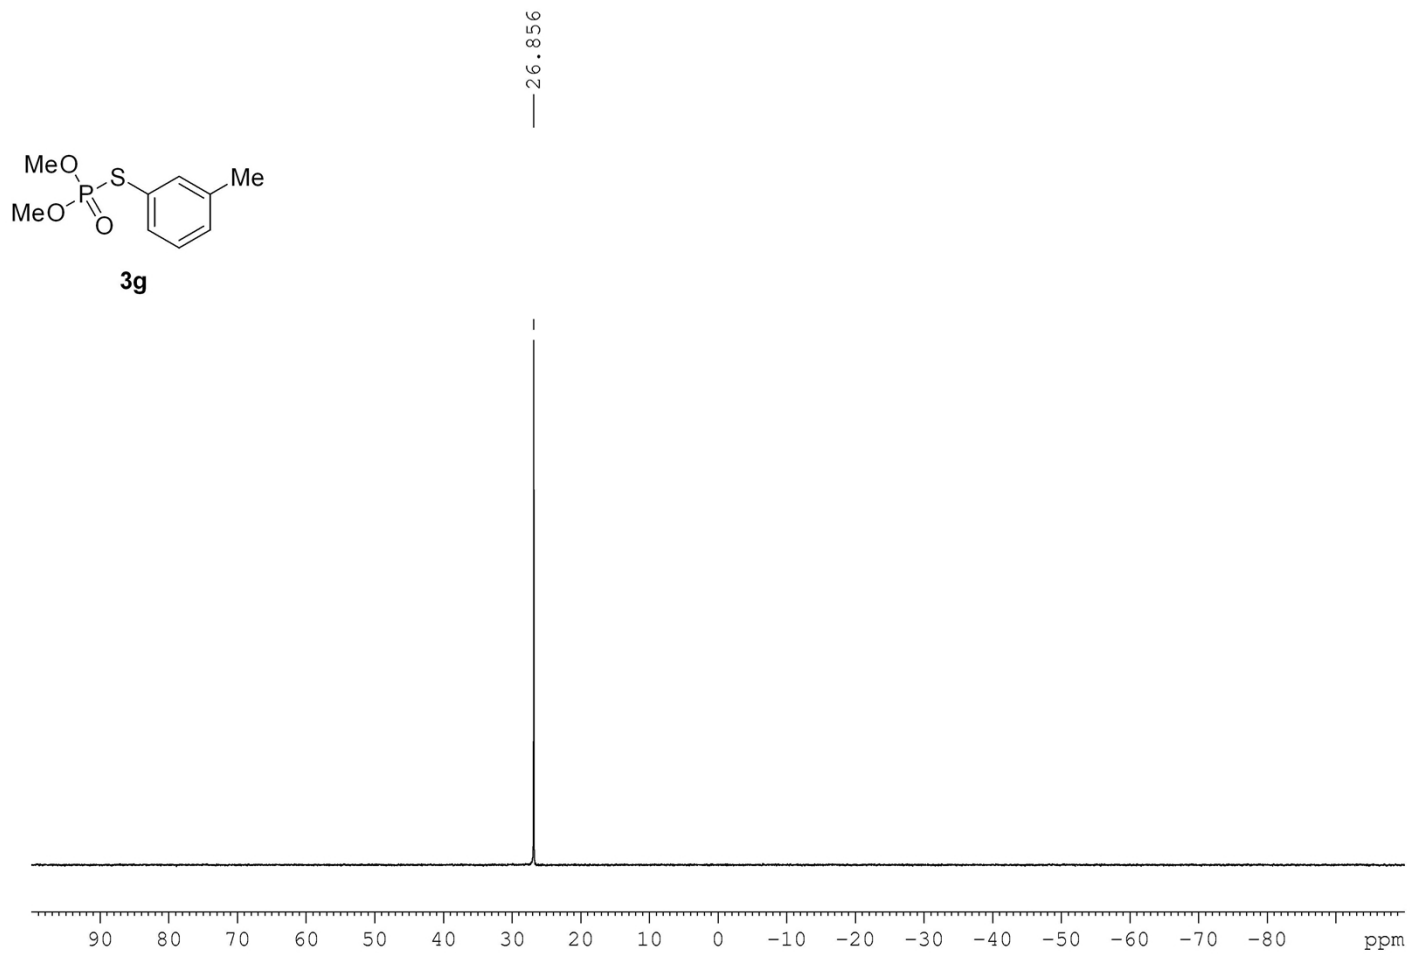

$^{31}\text{P}$  NMR spectrum of compound **3g**

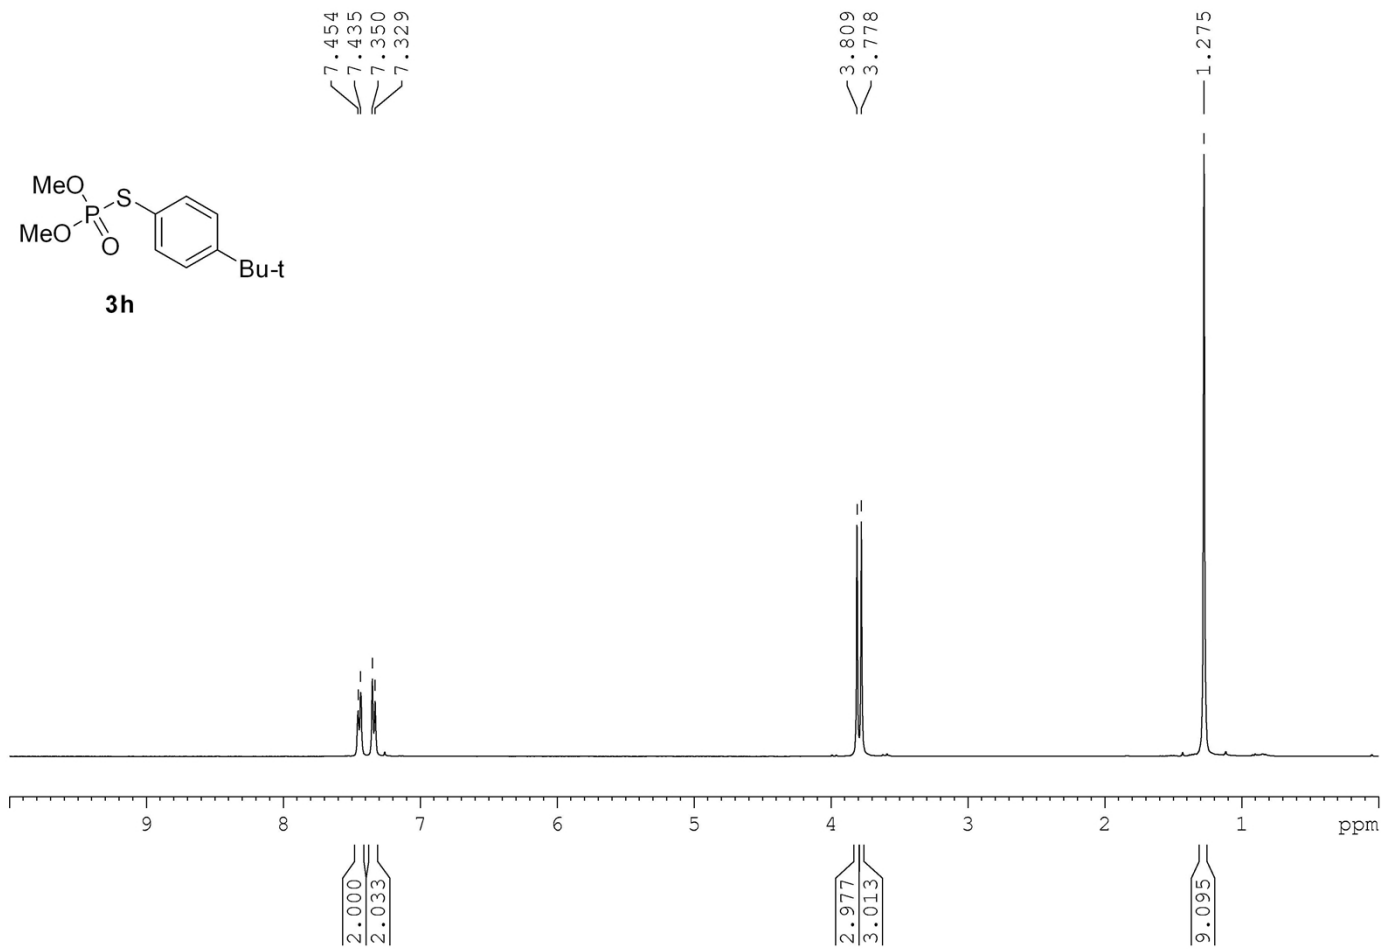

$^1\text{H}$  NMR spectrum of compound **3h**

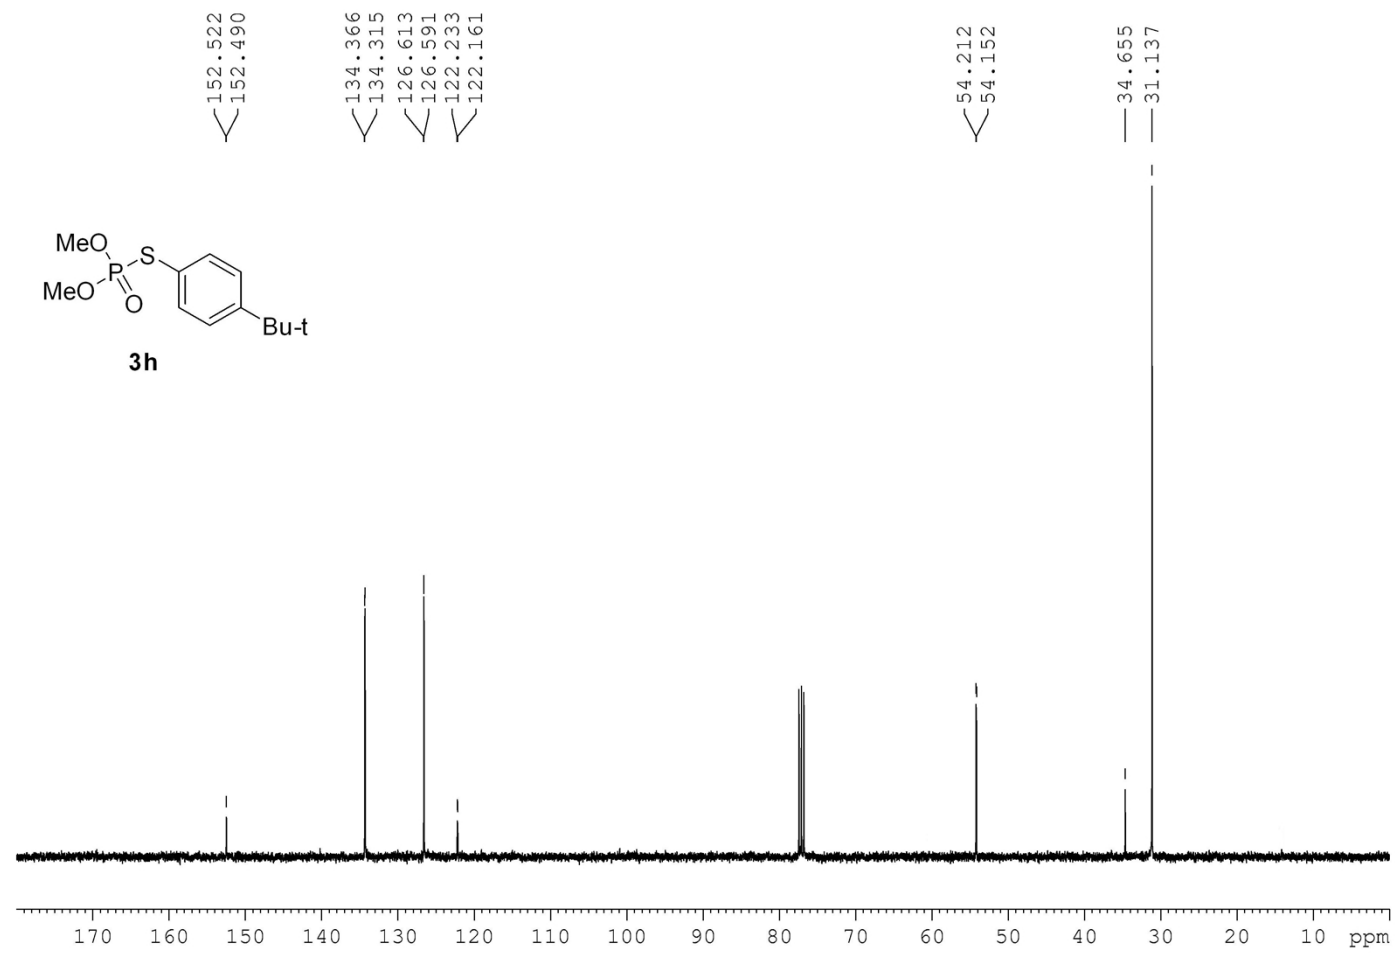

<sup>13</sup>C NMR spectrum of compound **3h**



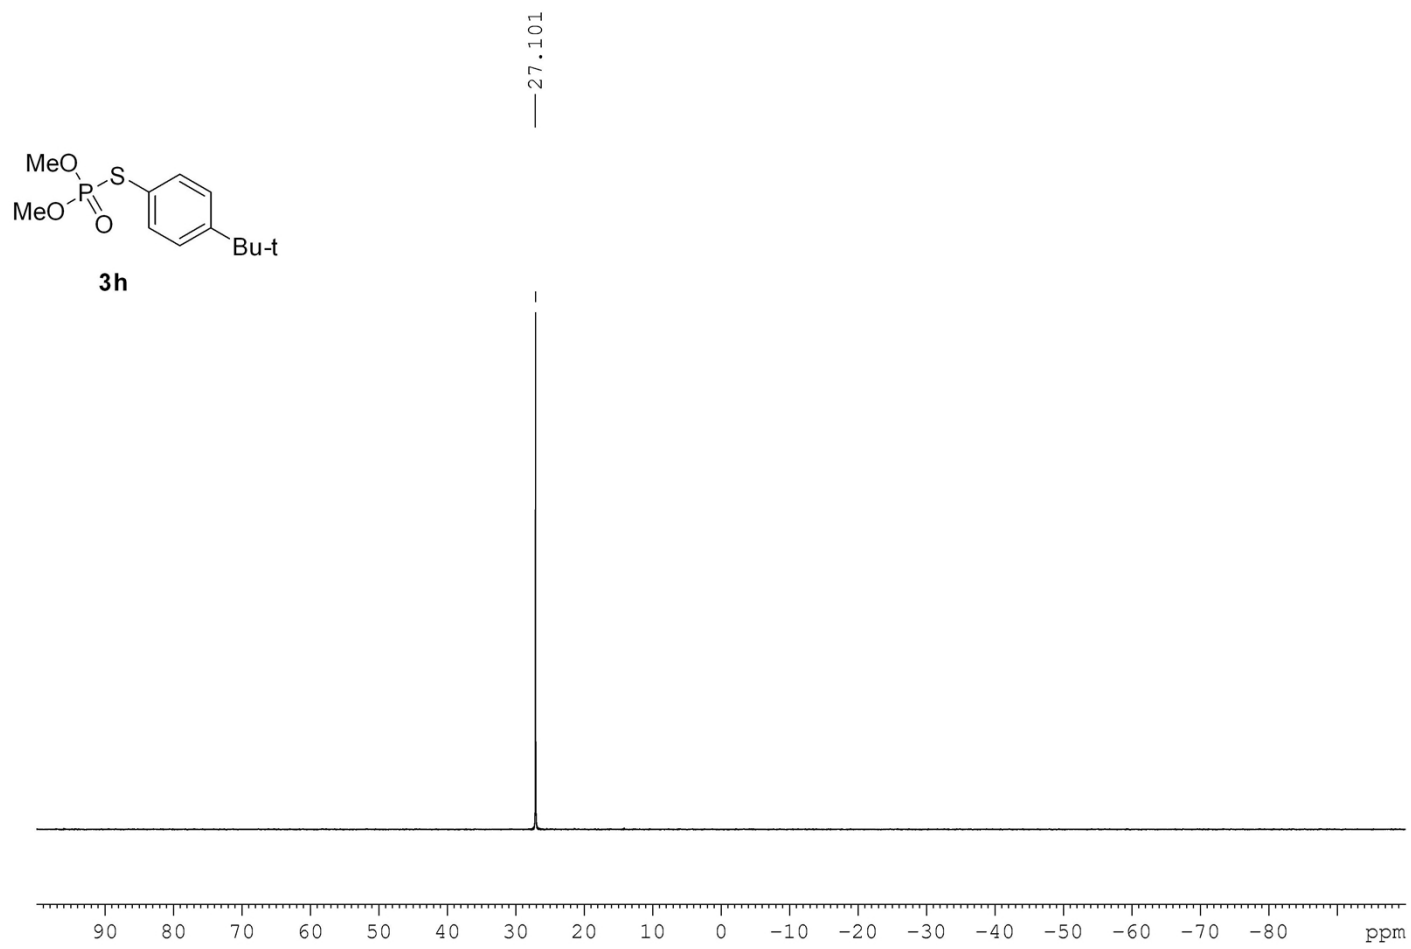

$^{31}\text{P}$  NMR spectrum of compound **3h**

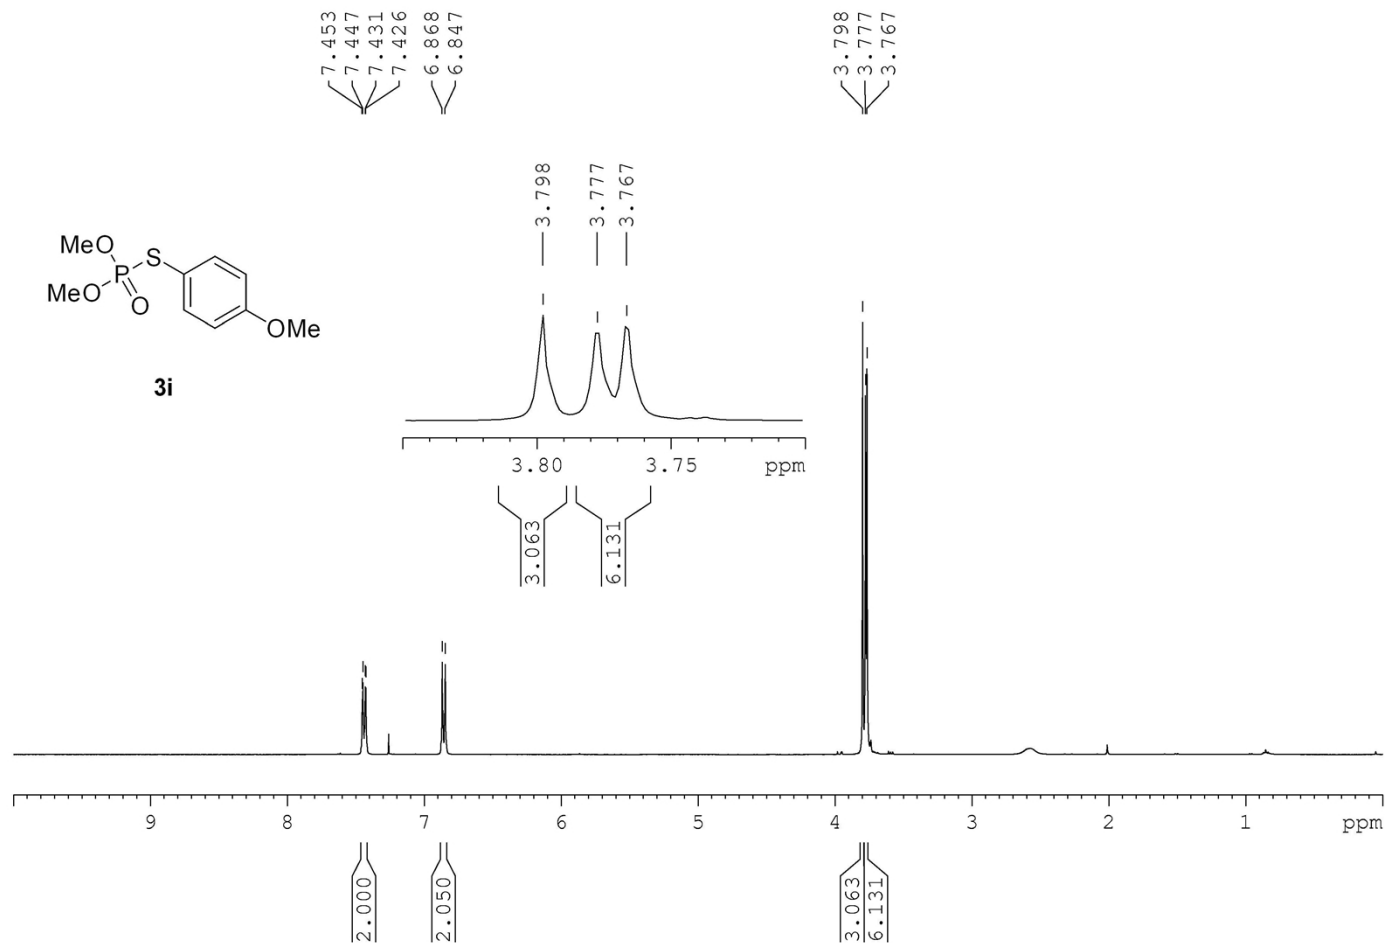

$^1\text{H}$  NMR spectrum of compound **3i**

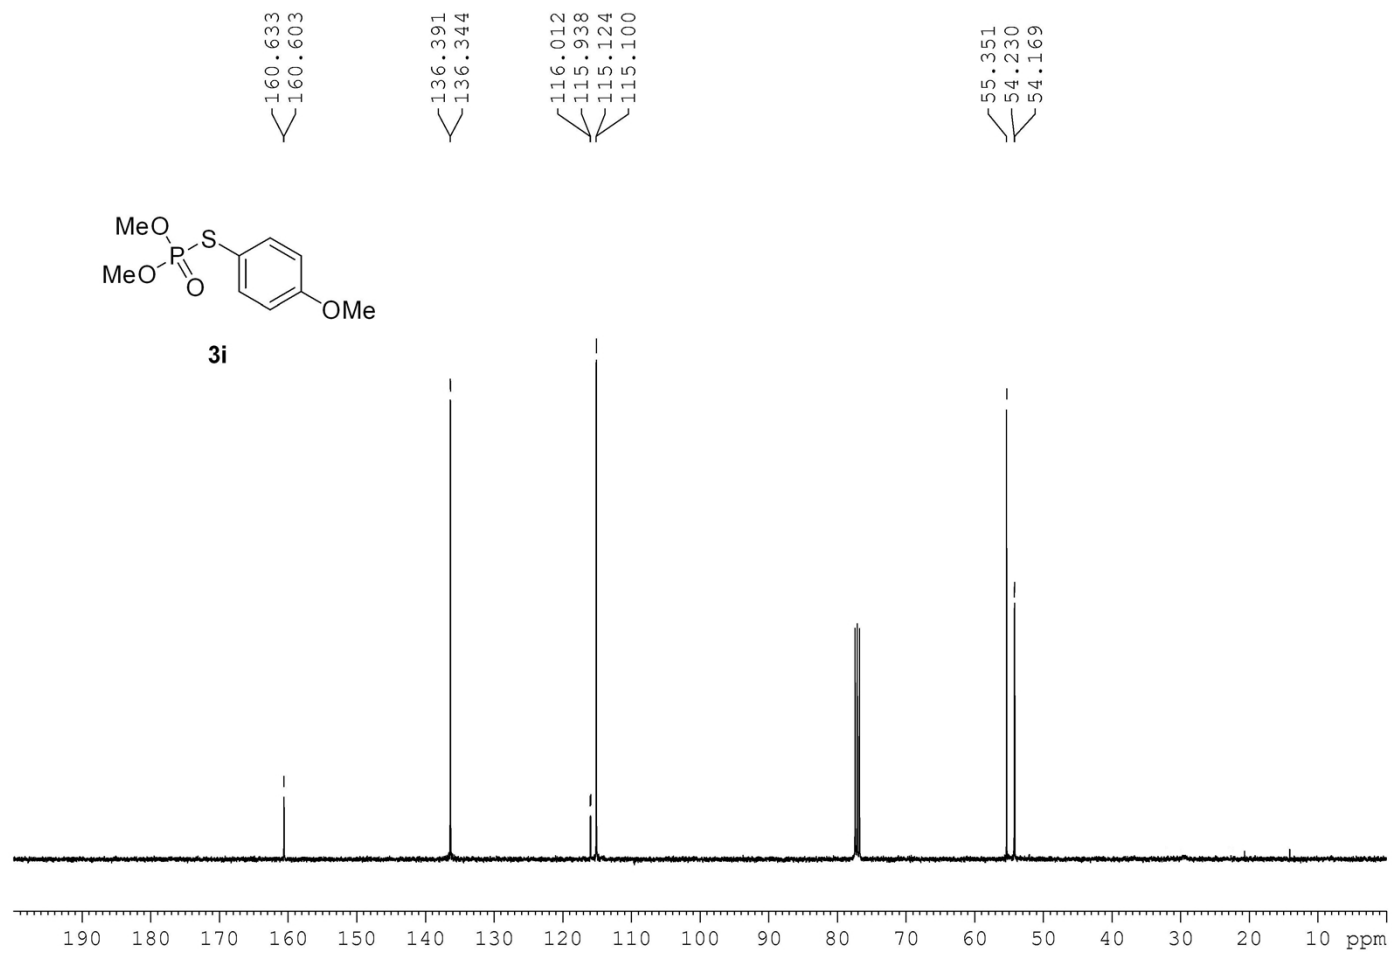

<sup>13</sup>C NMR spectrum of compound **3i**

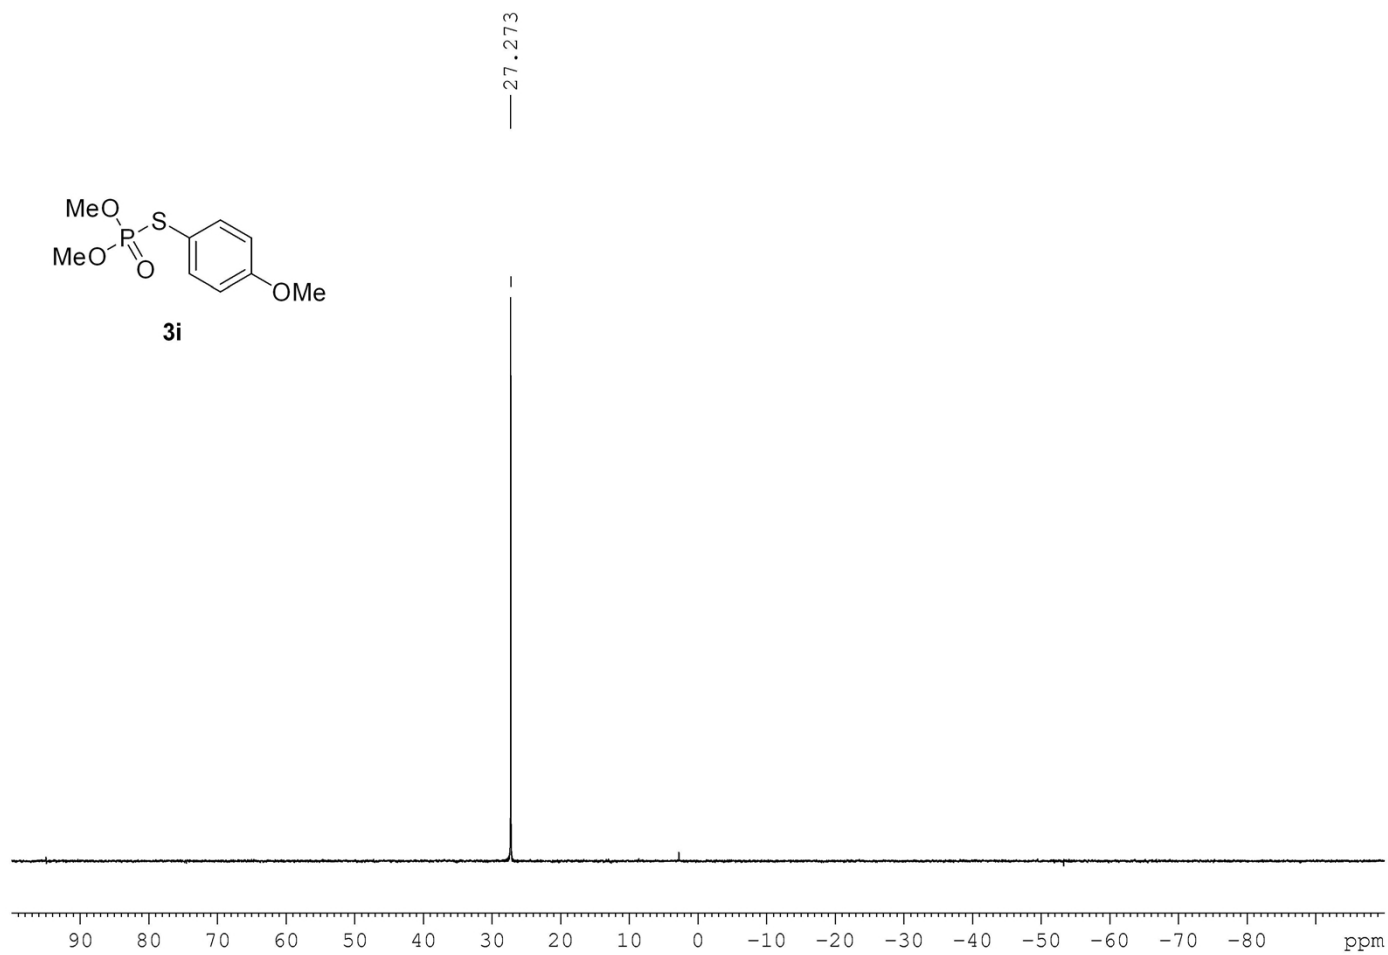

$^{31}\text{P}$  NMR spectrum of compound **3i**

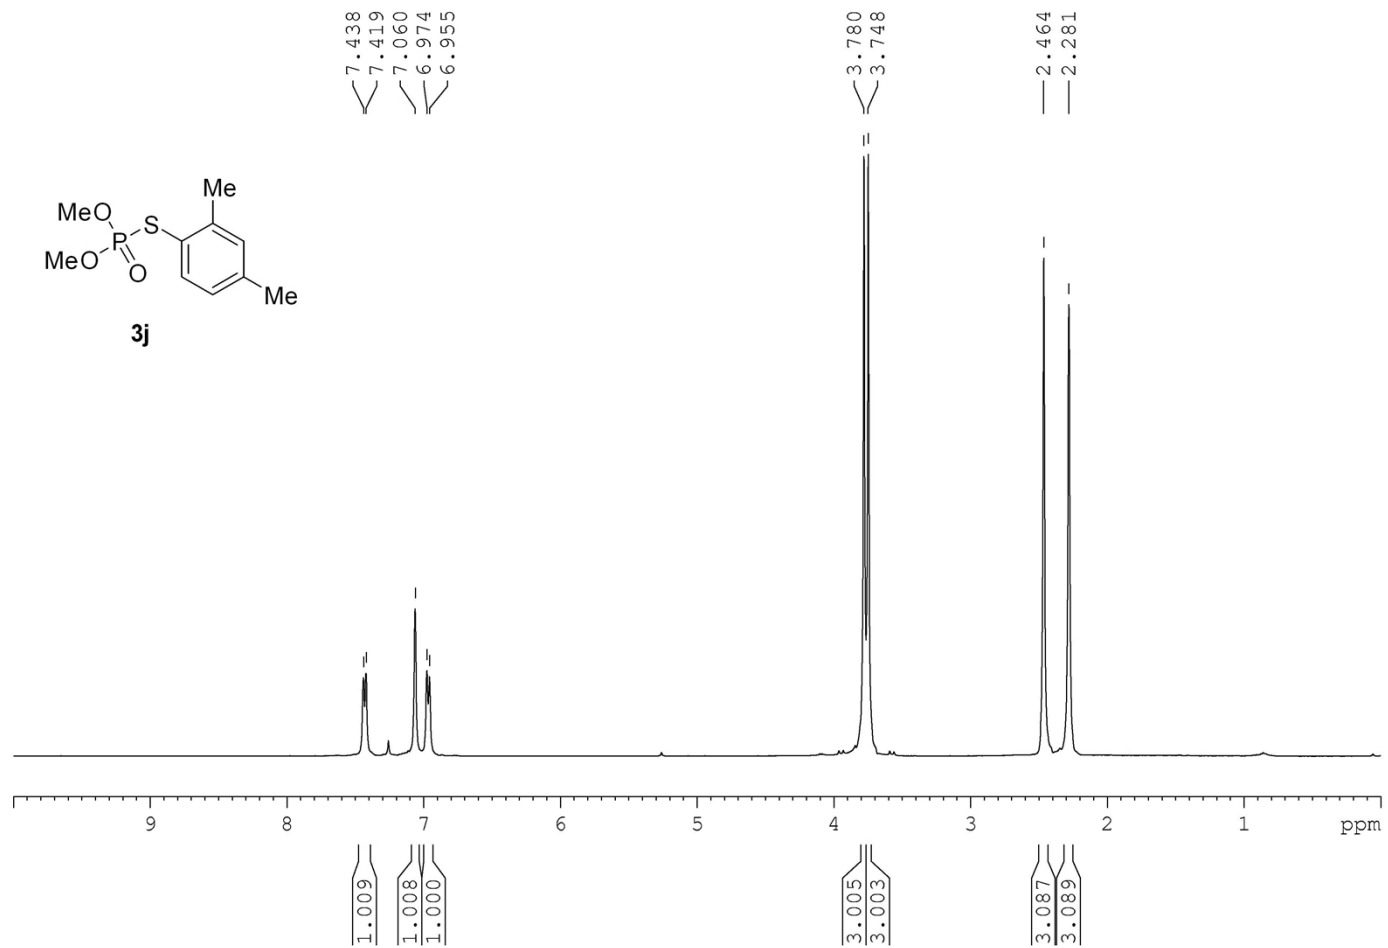

<sup>1</sup>H NMR spectrum of compound **3j**

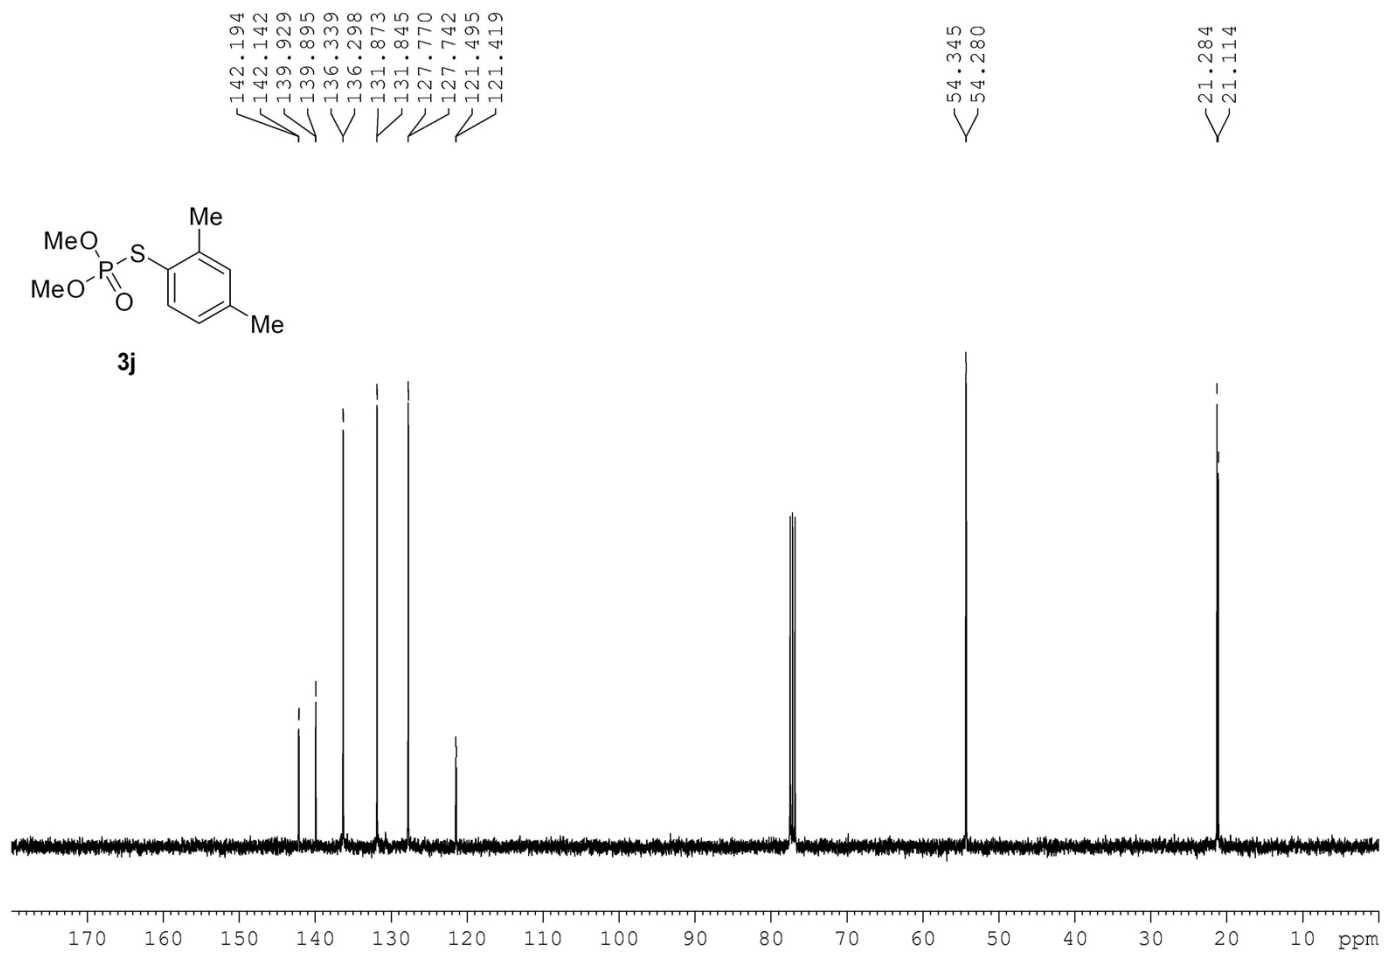

<sup>13</sup>C NMR spectrum of compound **3j**

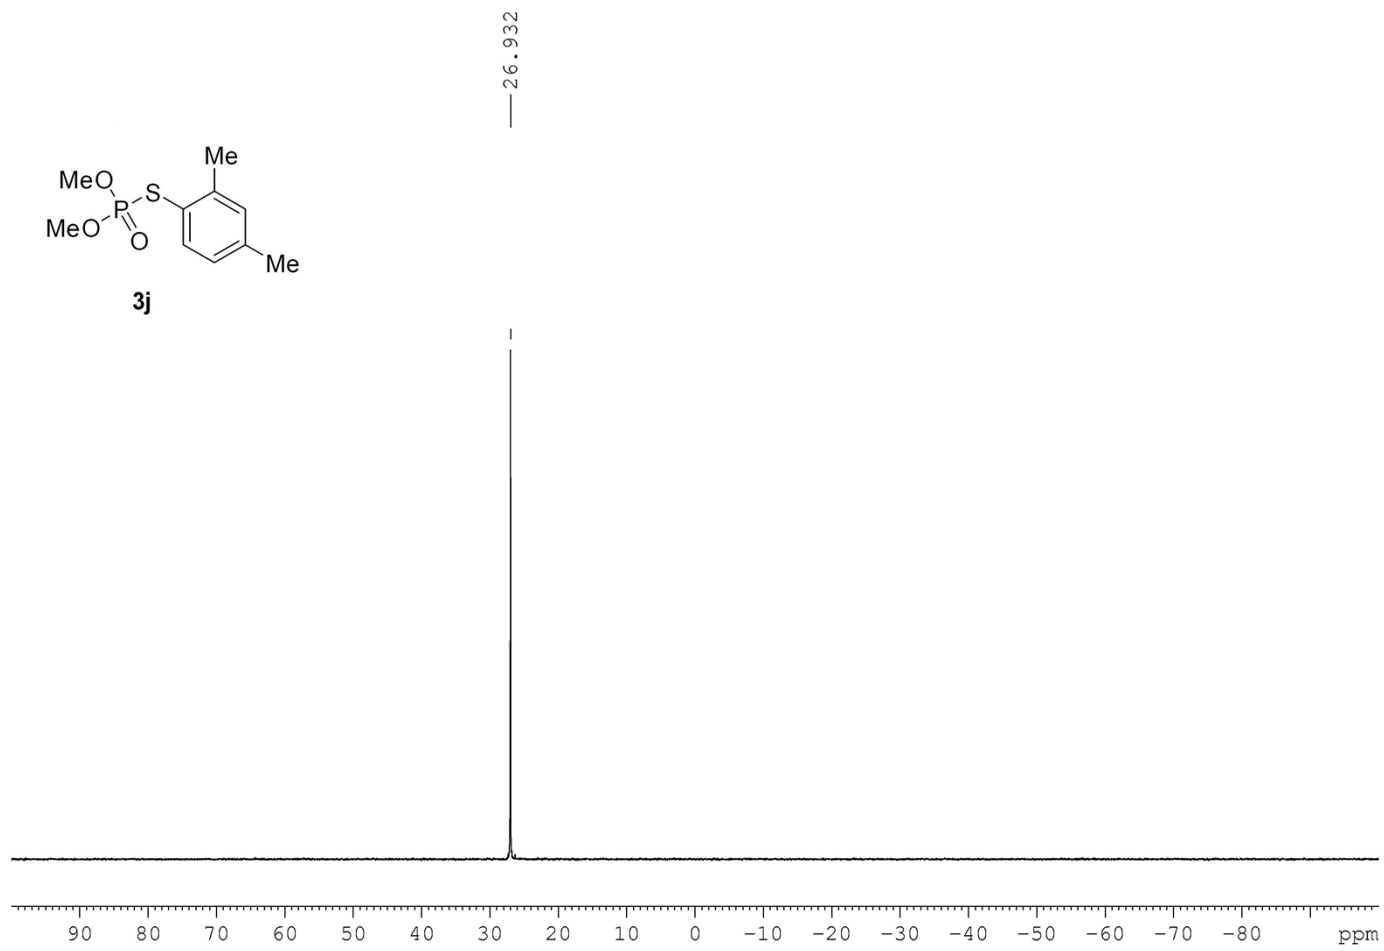

$^{31}\text{P}$  NMR spectrum of compound **3j**

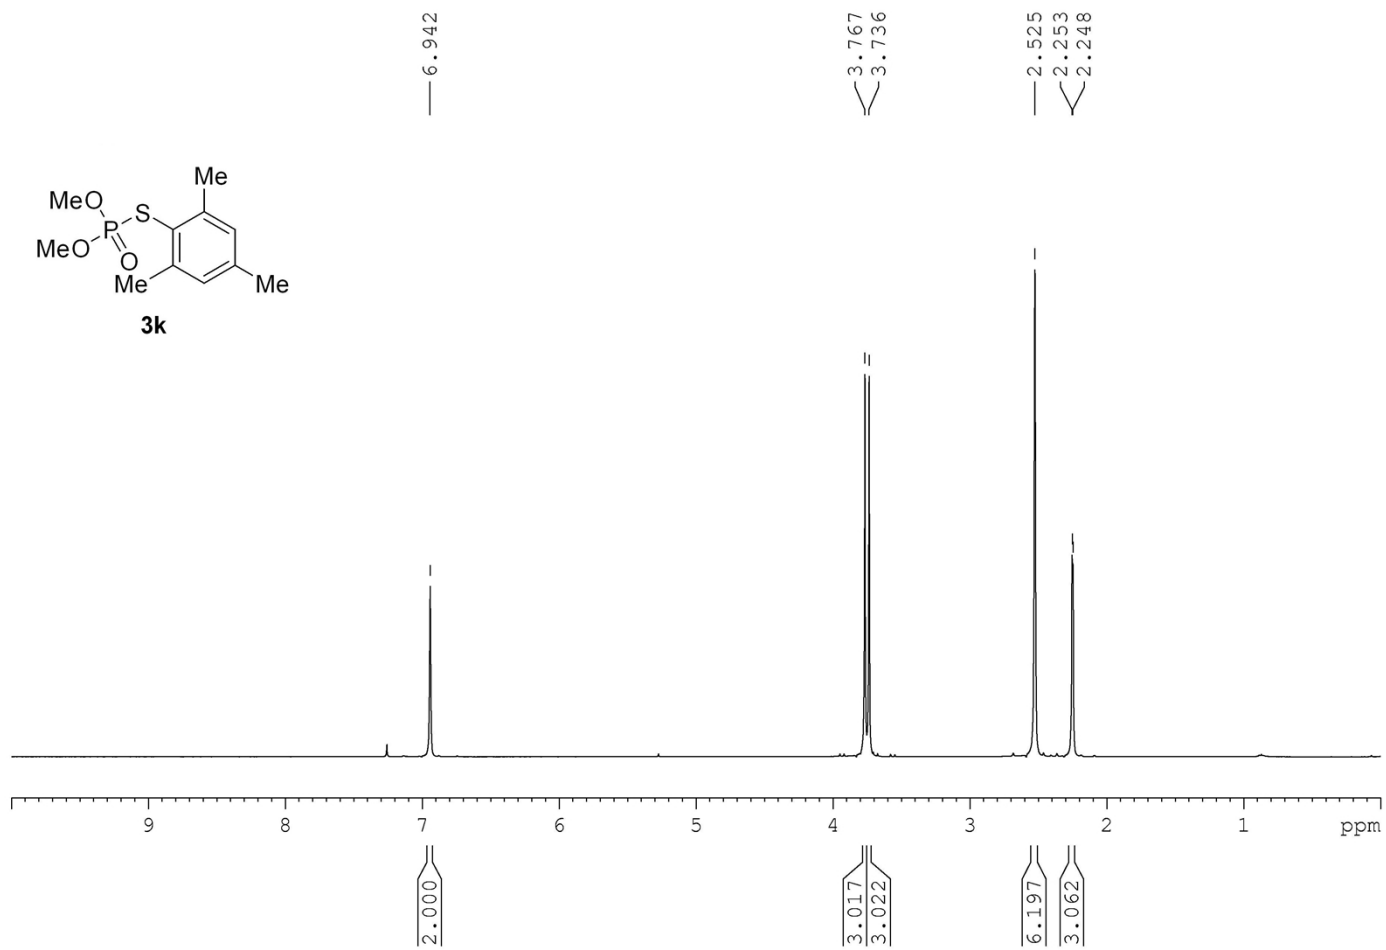

<sup>1</sup>H NMR spectrum of compound **3k**



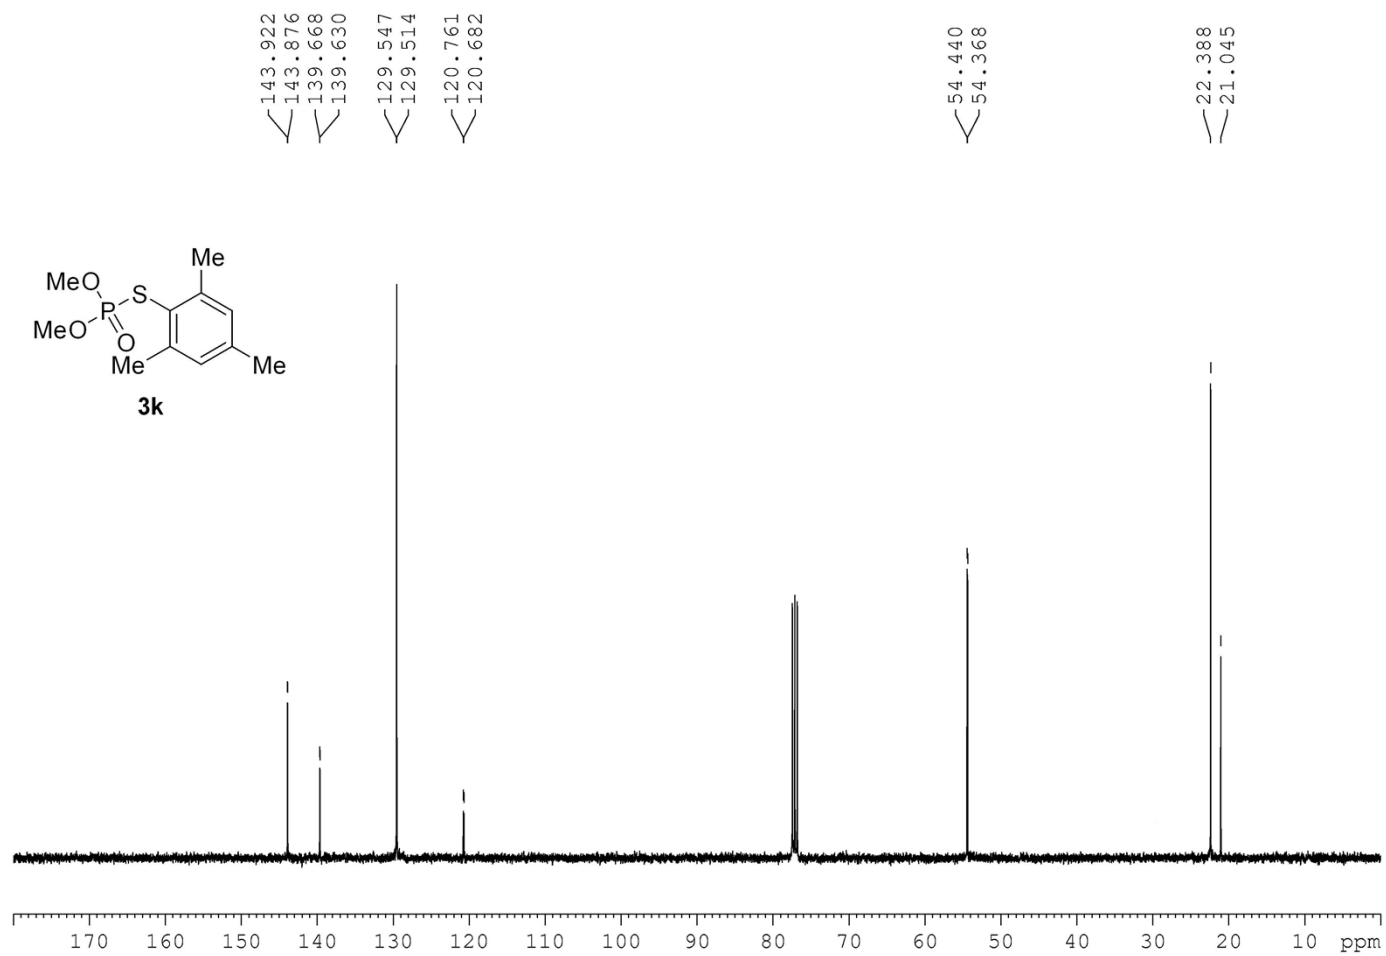

$^{13}\text{C}$  NMR spectrum of compound **3k**

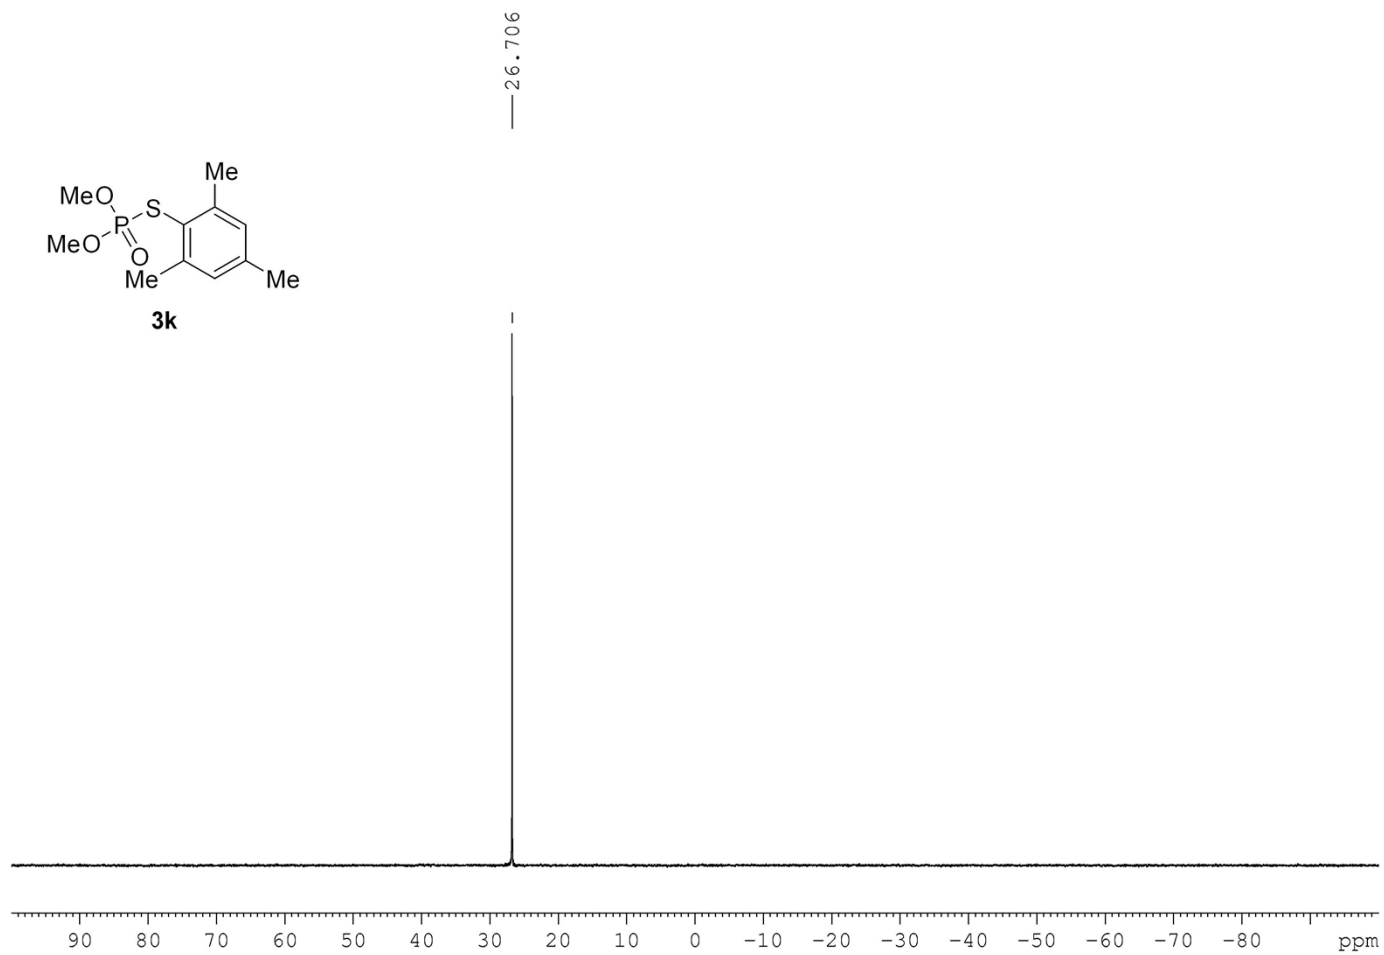

$^{31}\text{P}$  NMR spectrum of compound **3k**

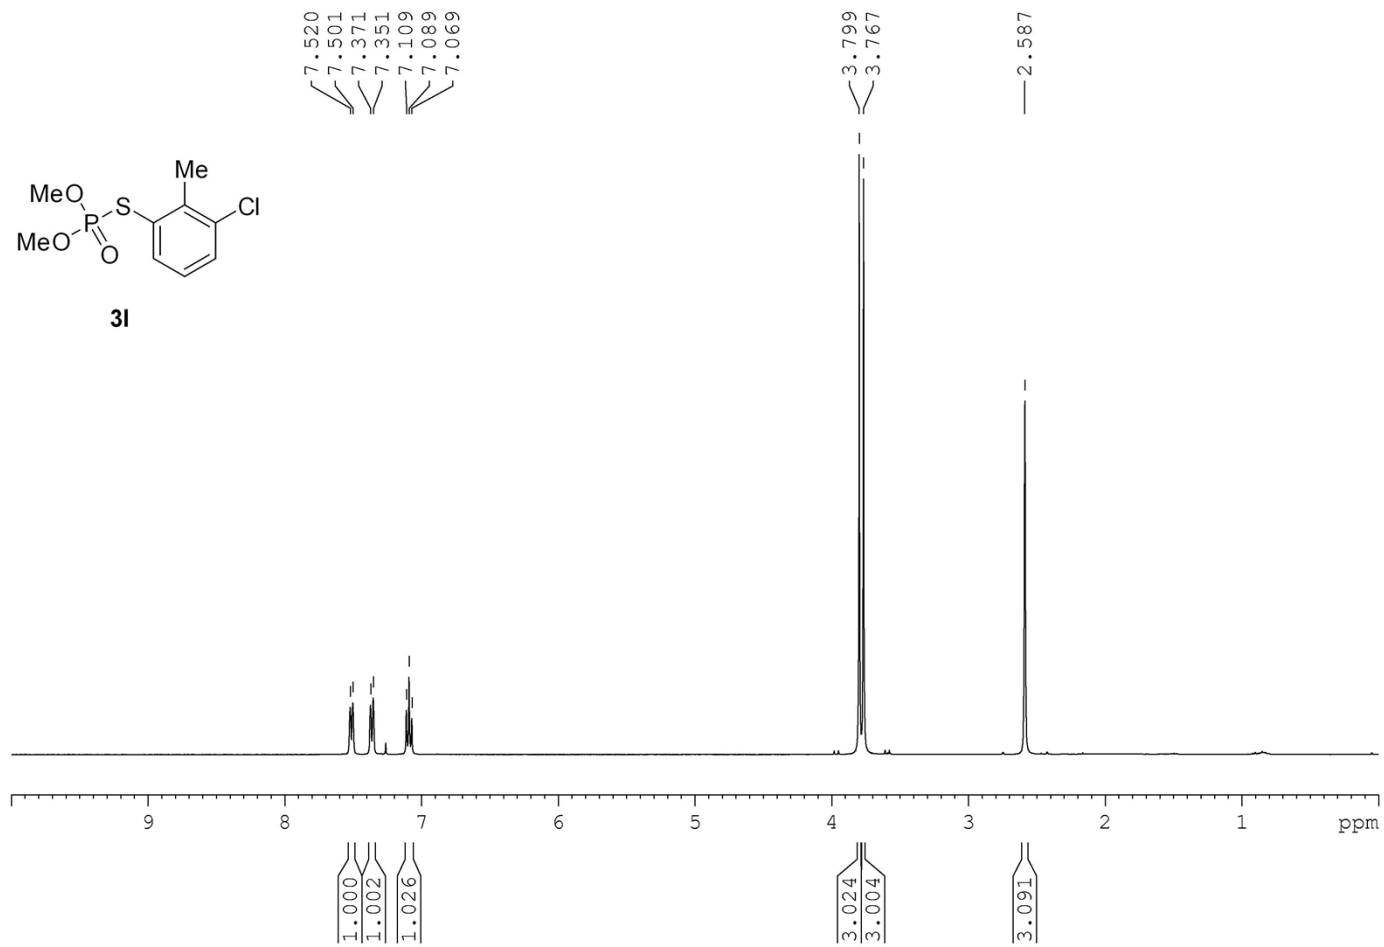

$^1\text{H}$  NMR spectrum of compound **3I**

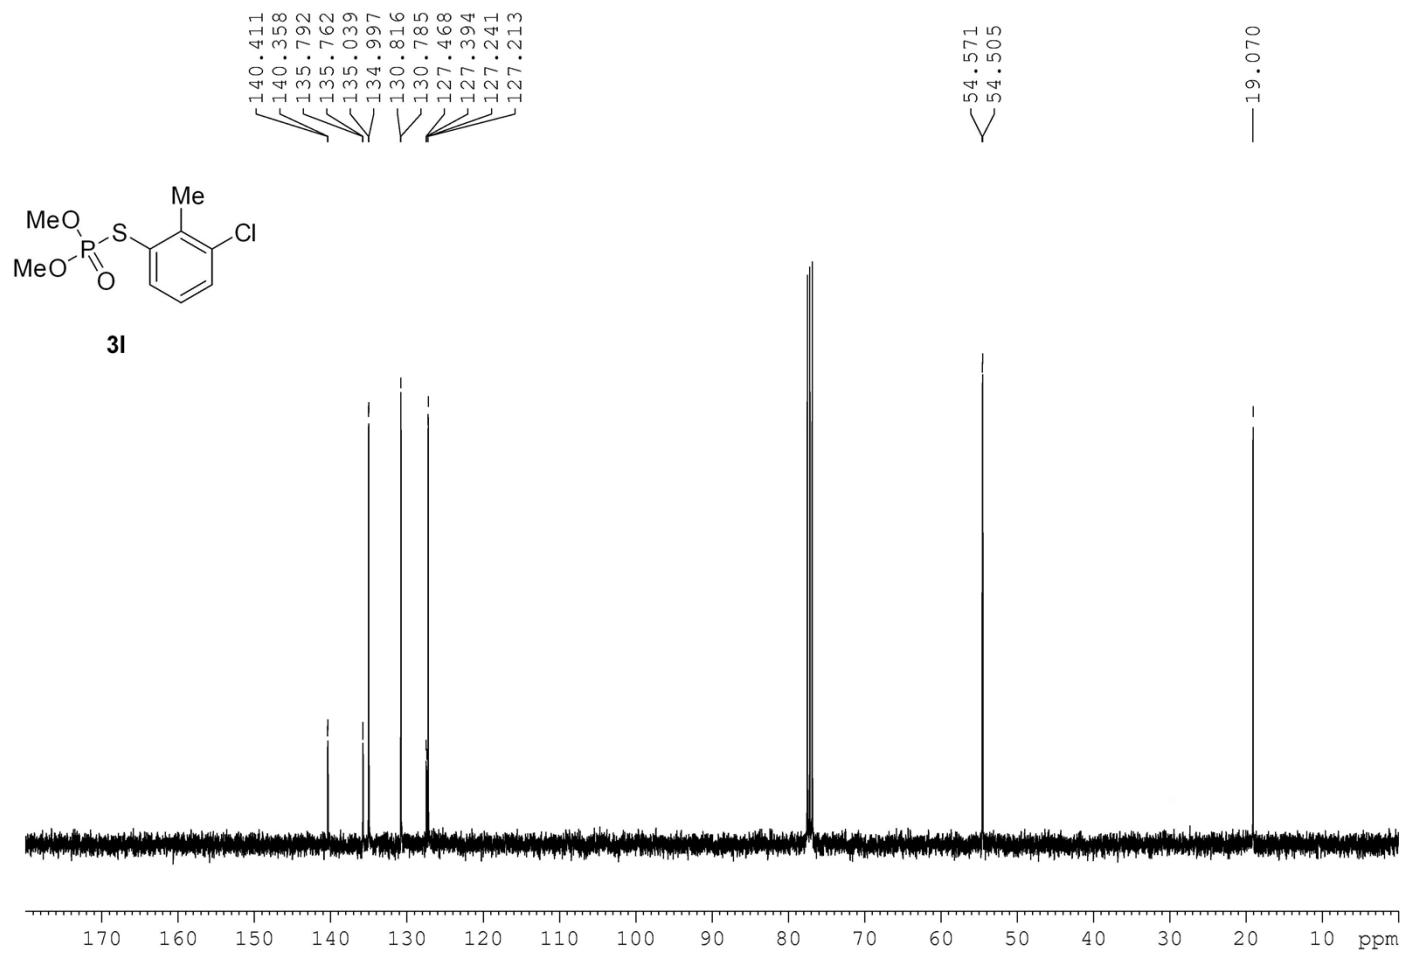

$^{13}\text{C}$  NMR spectrum of compound **3I**

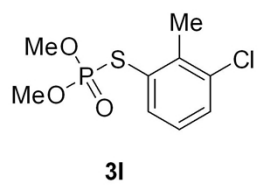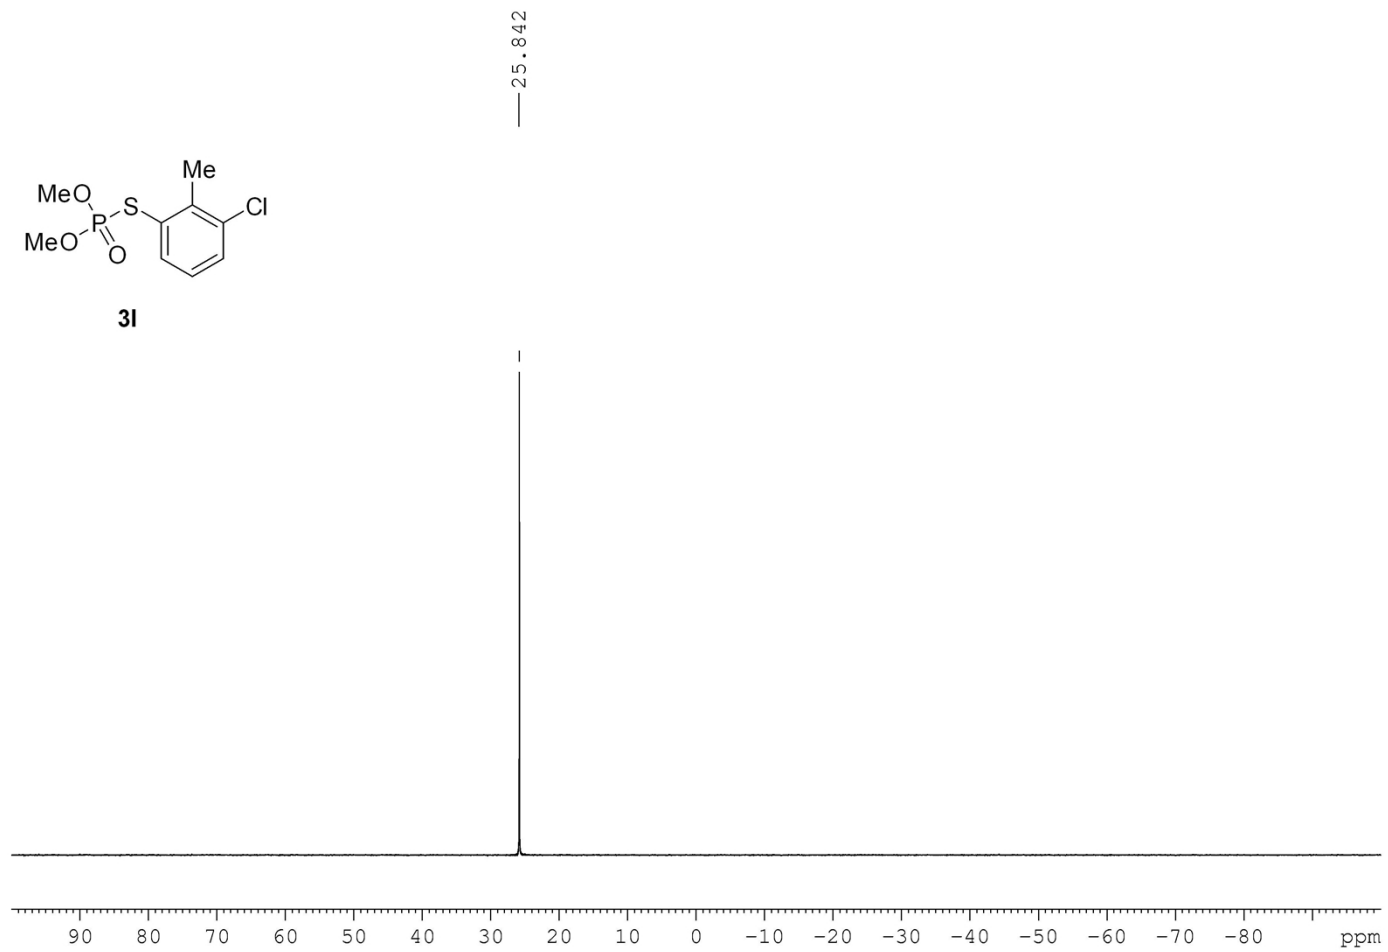

$^{31}\text{P}$  NMR spectrum of compound **31**

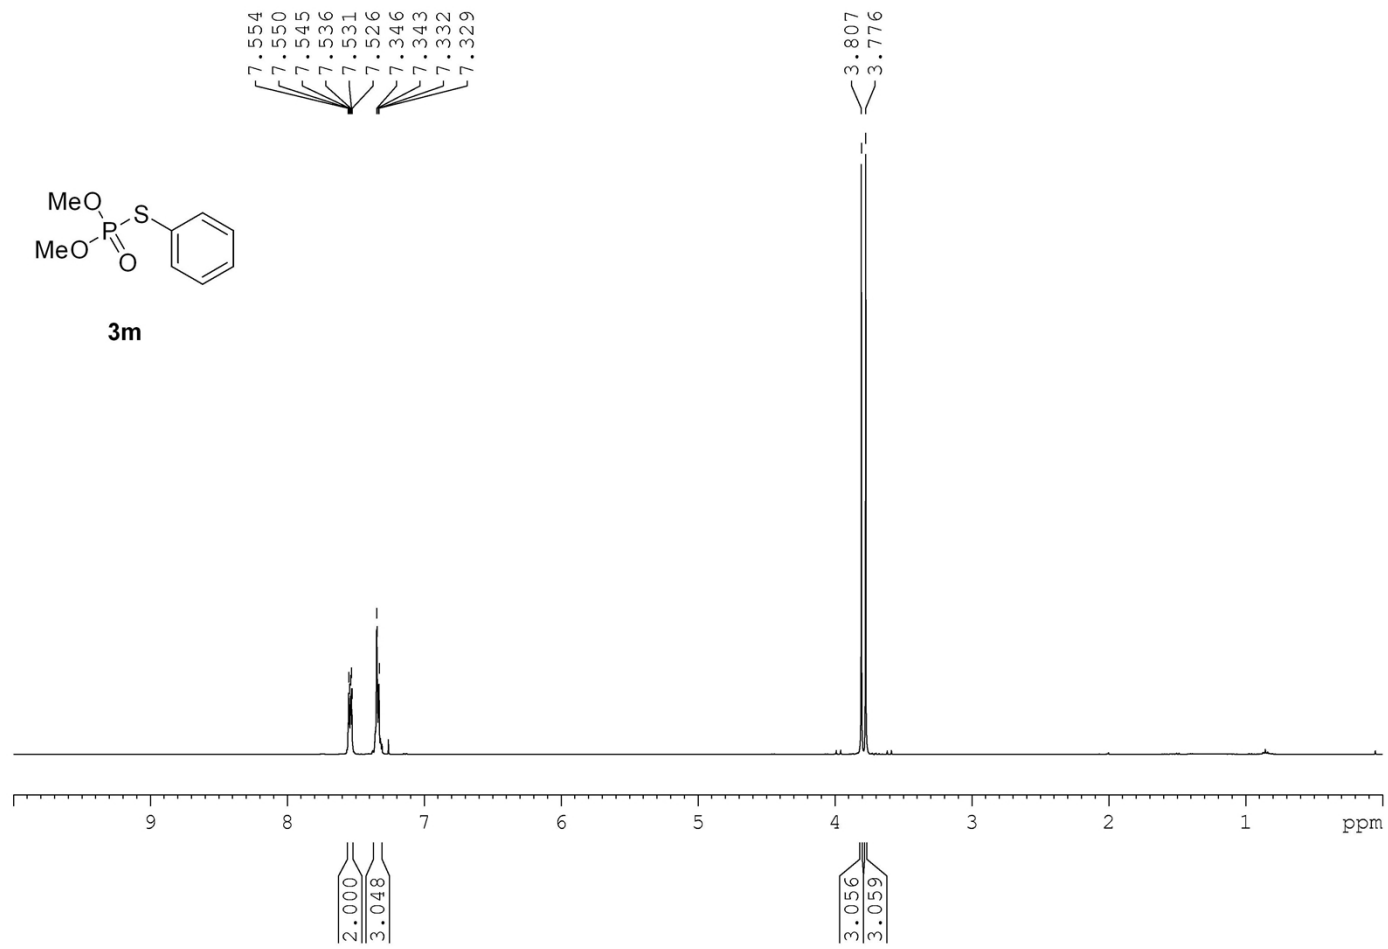

**<sup>1</sup>H NMR spectrum of compound 3m**

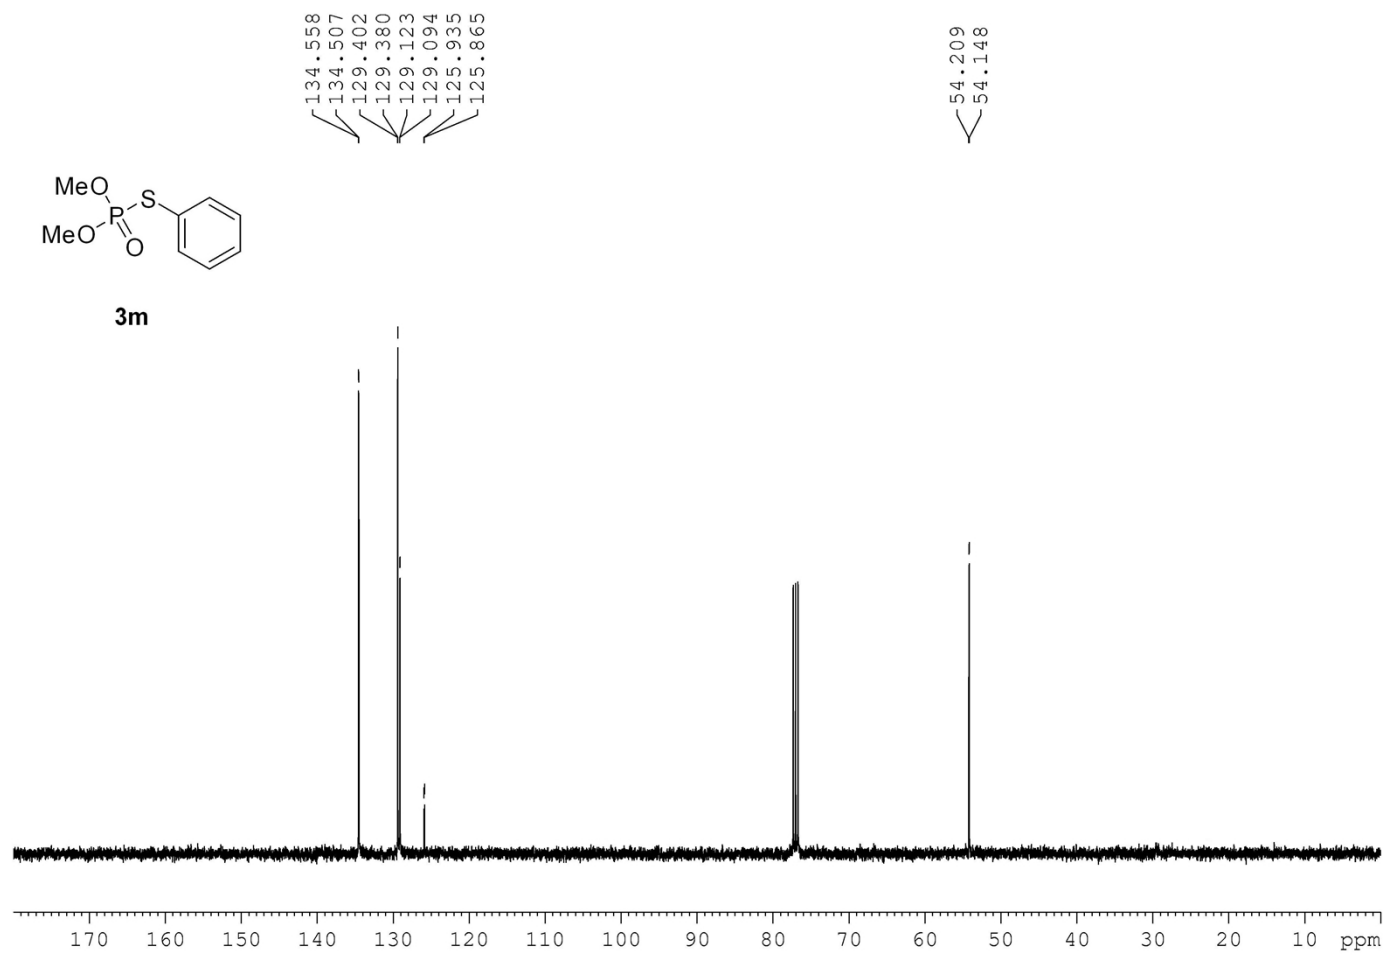

$^{13}\text{C}$  NMR spectrum of compound **3m**

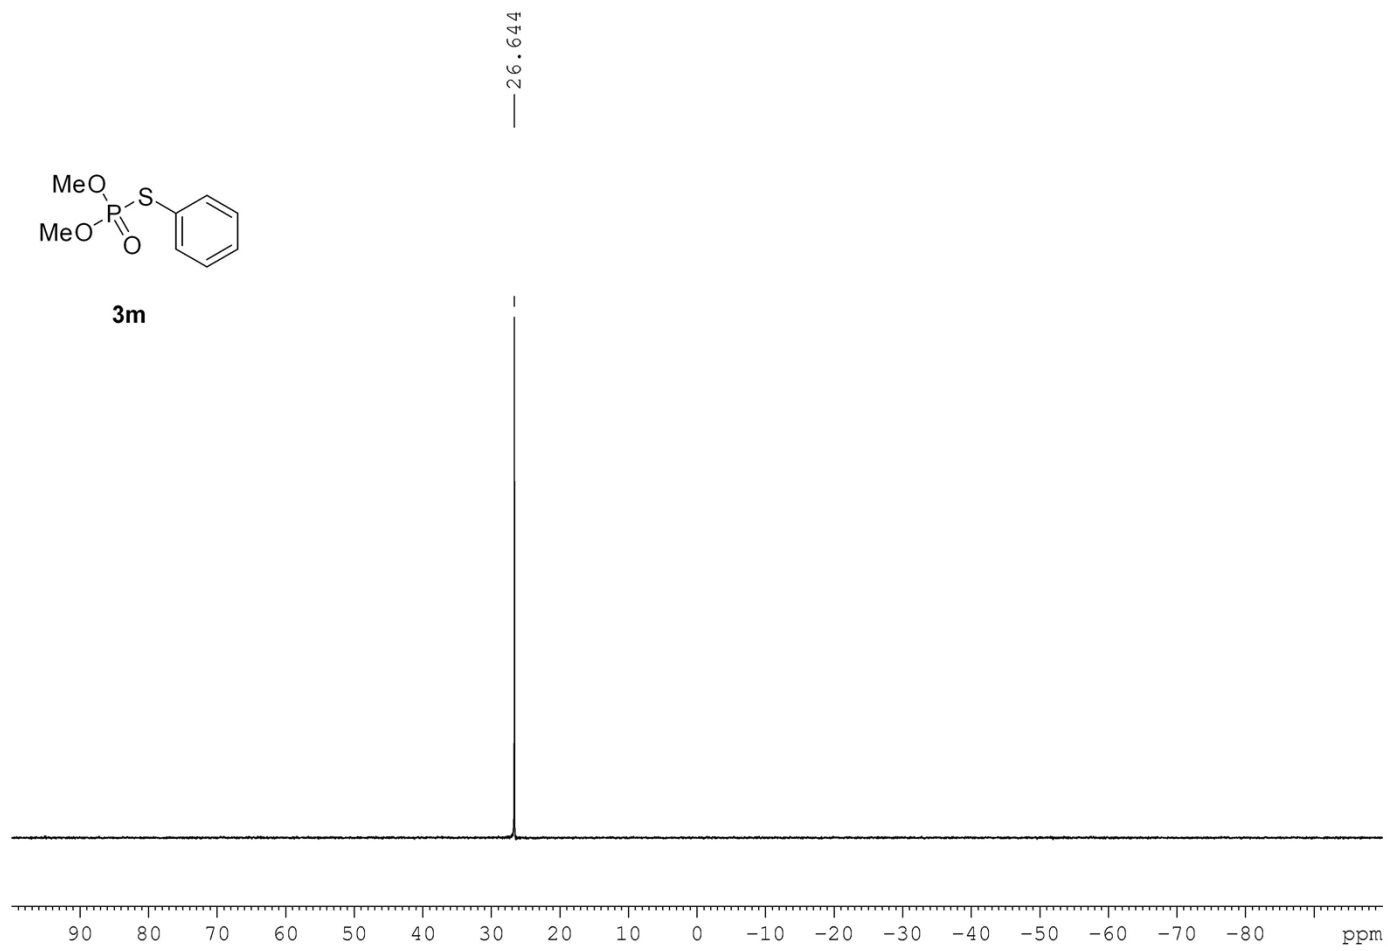

$^{31}\text{P}$  NMR spectrum of compound **3m**



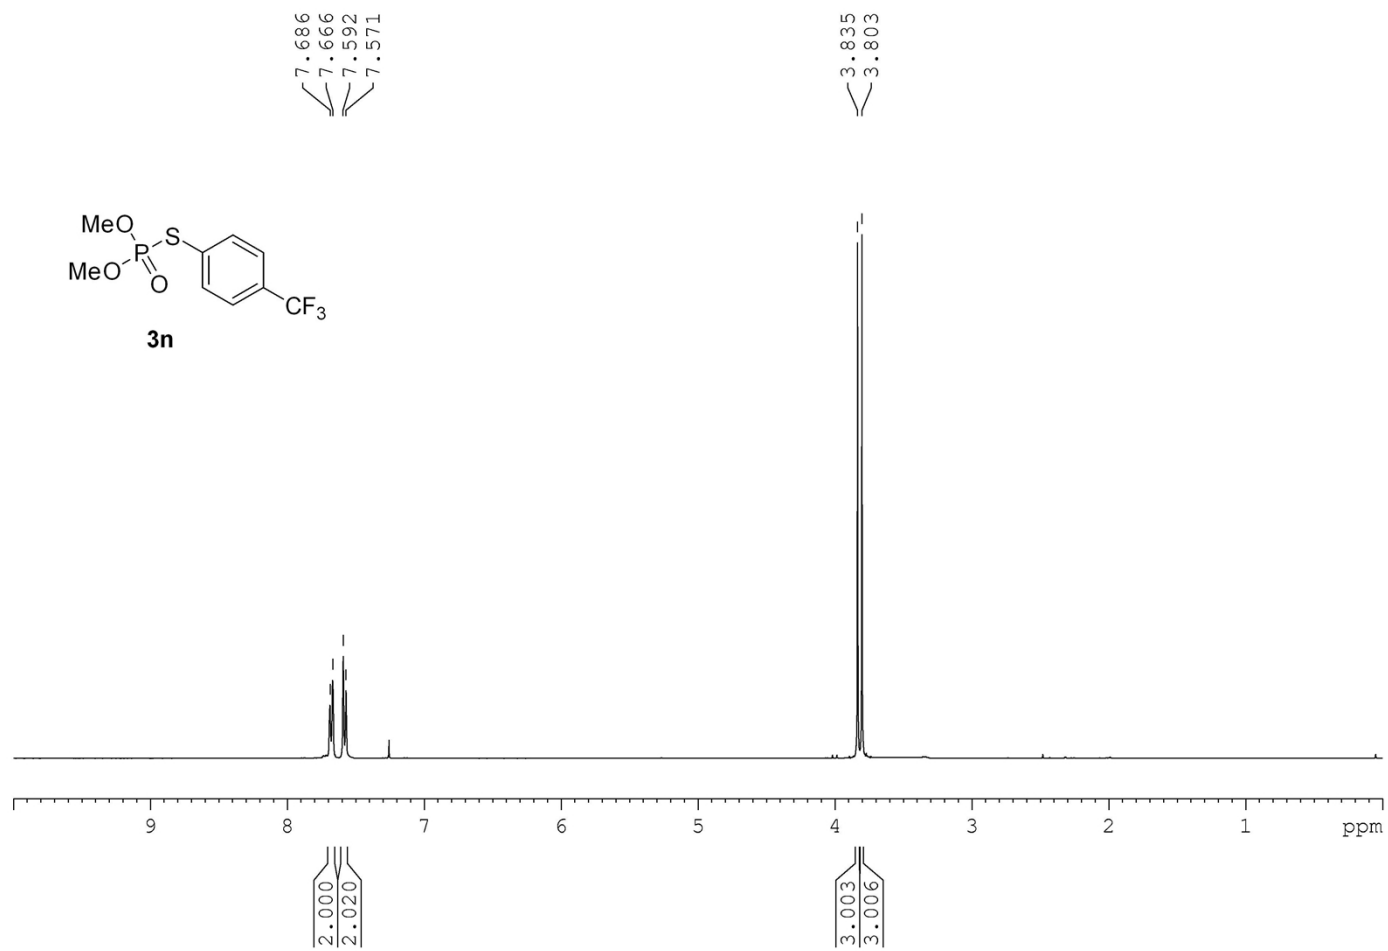

$^1\text{H}$  NMR spectrum of compound **3n**

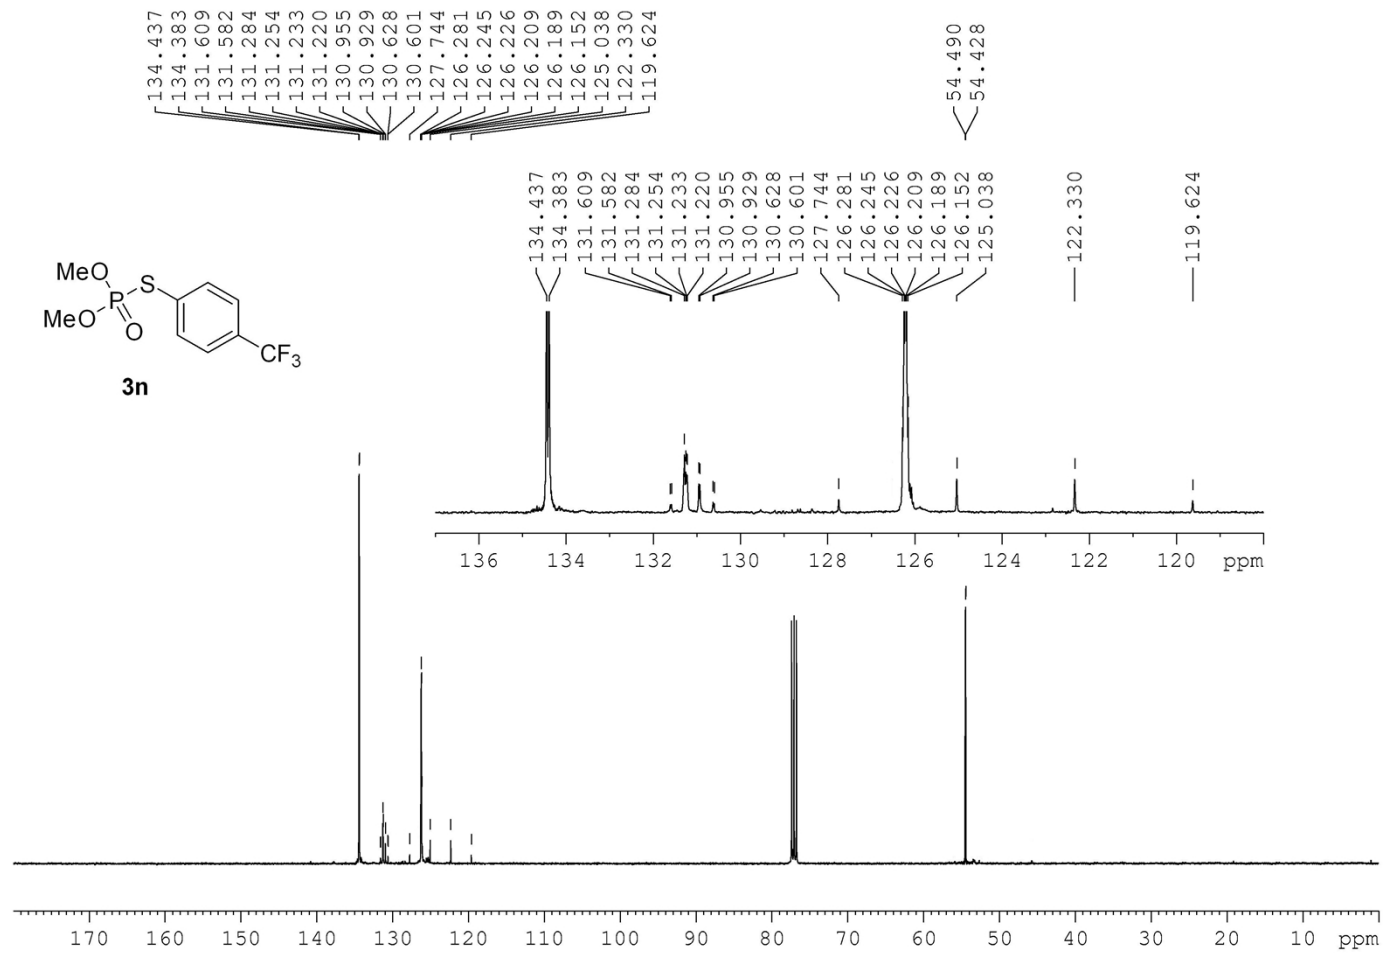

<sup>13</sup>C NMR spectrum of compound **3n**

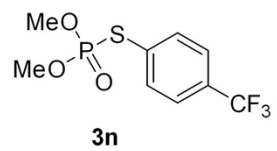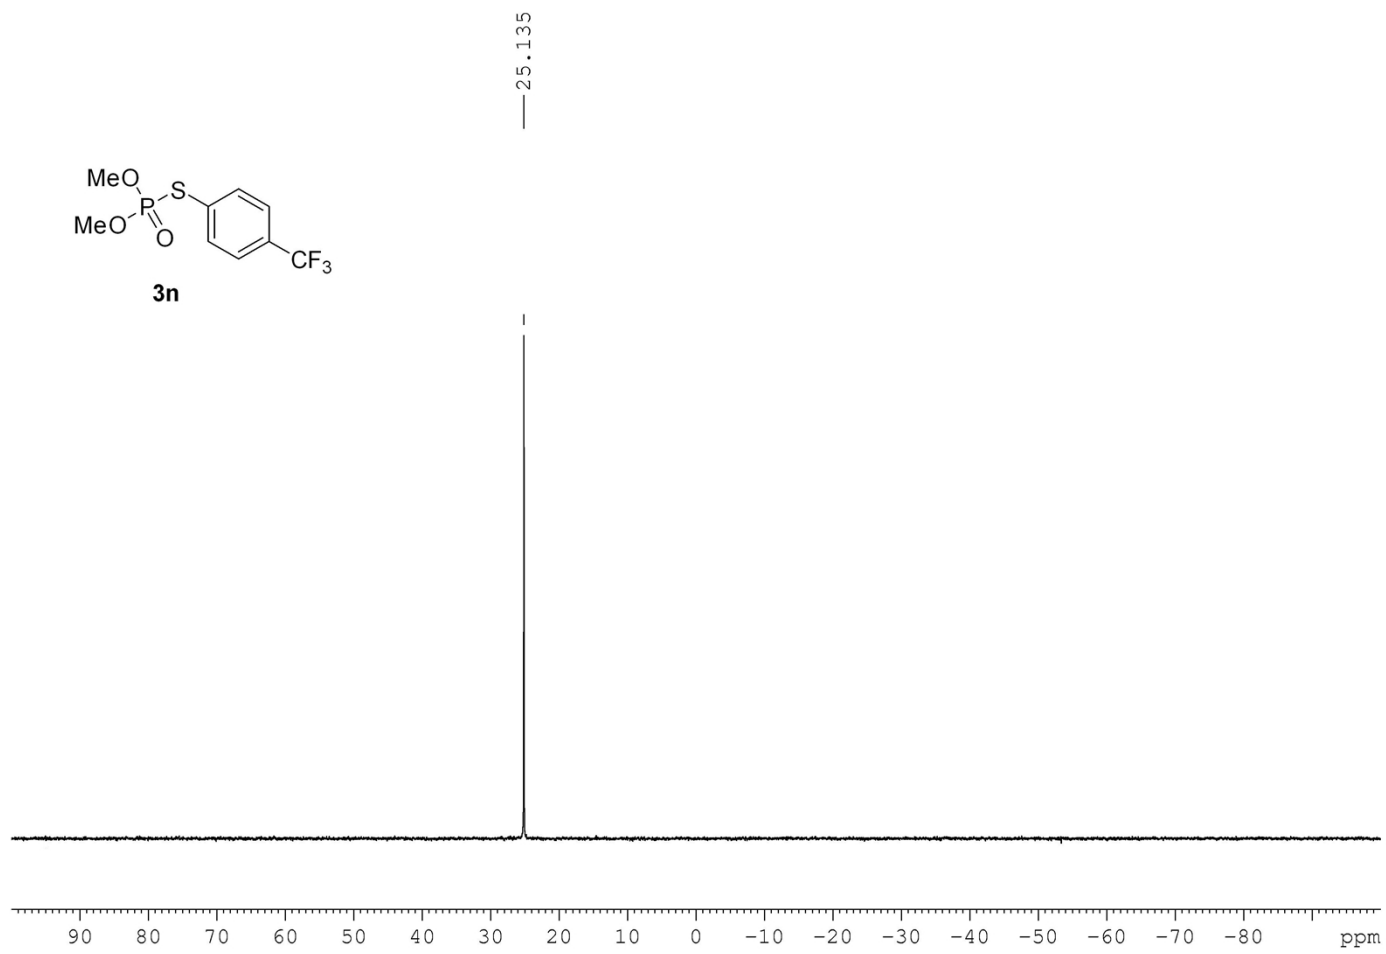

$^{31}\text{P}$  NMR spectrum of compound **3n**

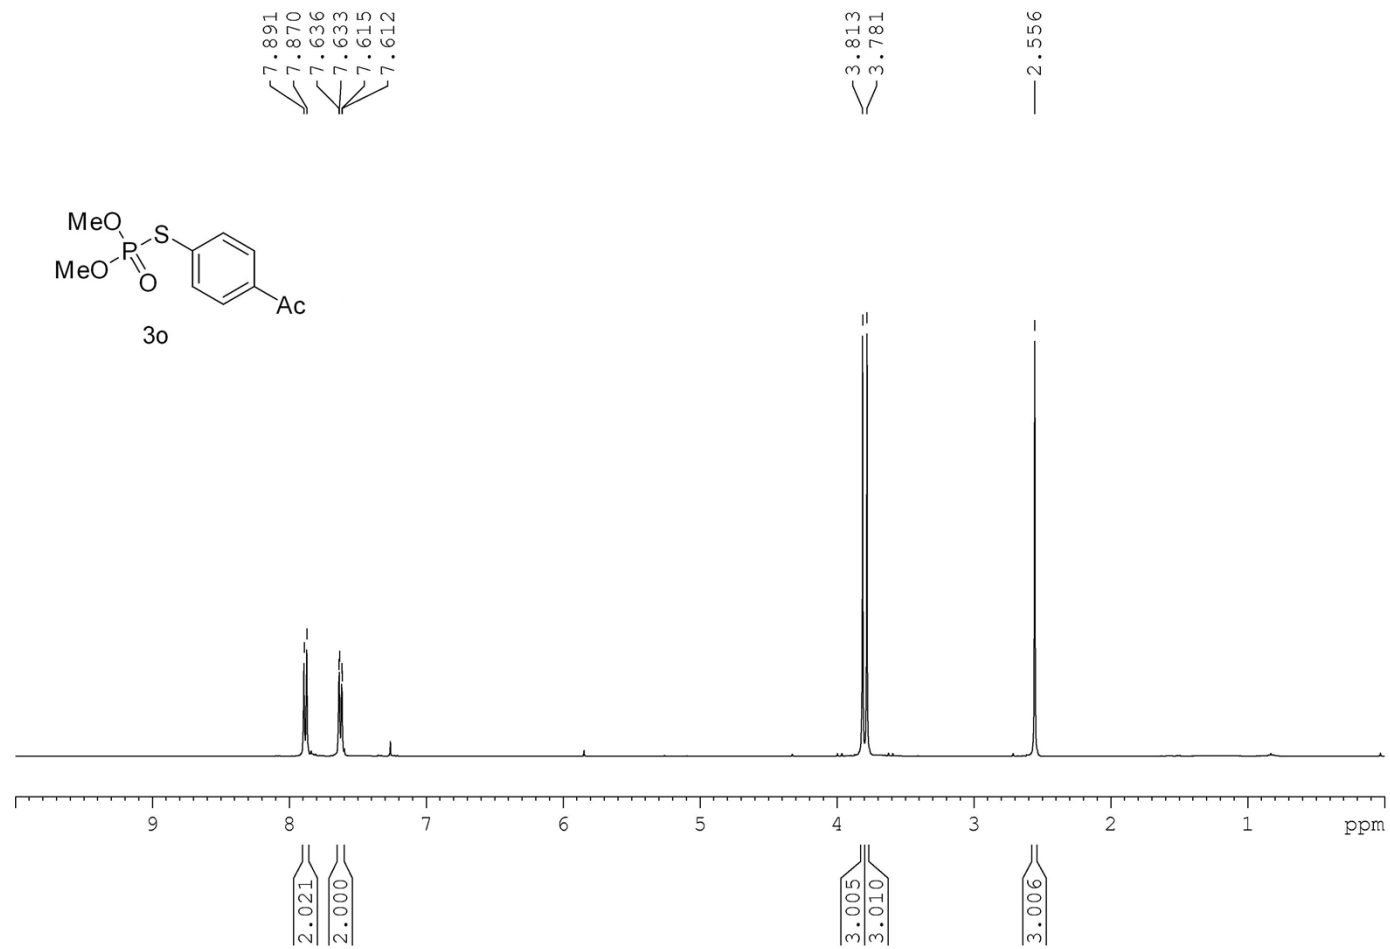

<sup>1</sup>H NMR spectrum of compound **3o**

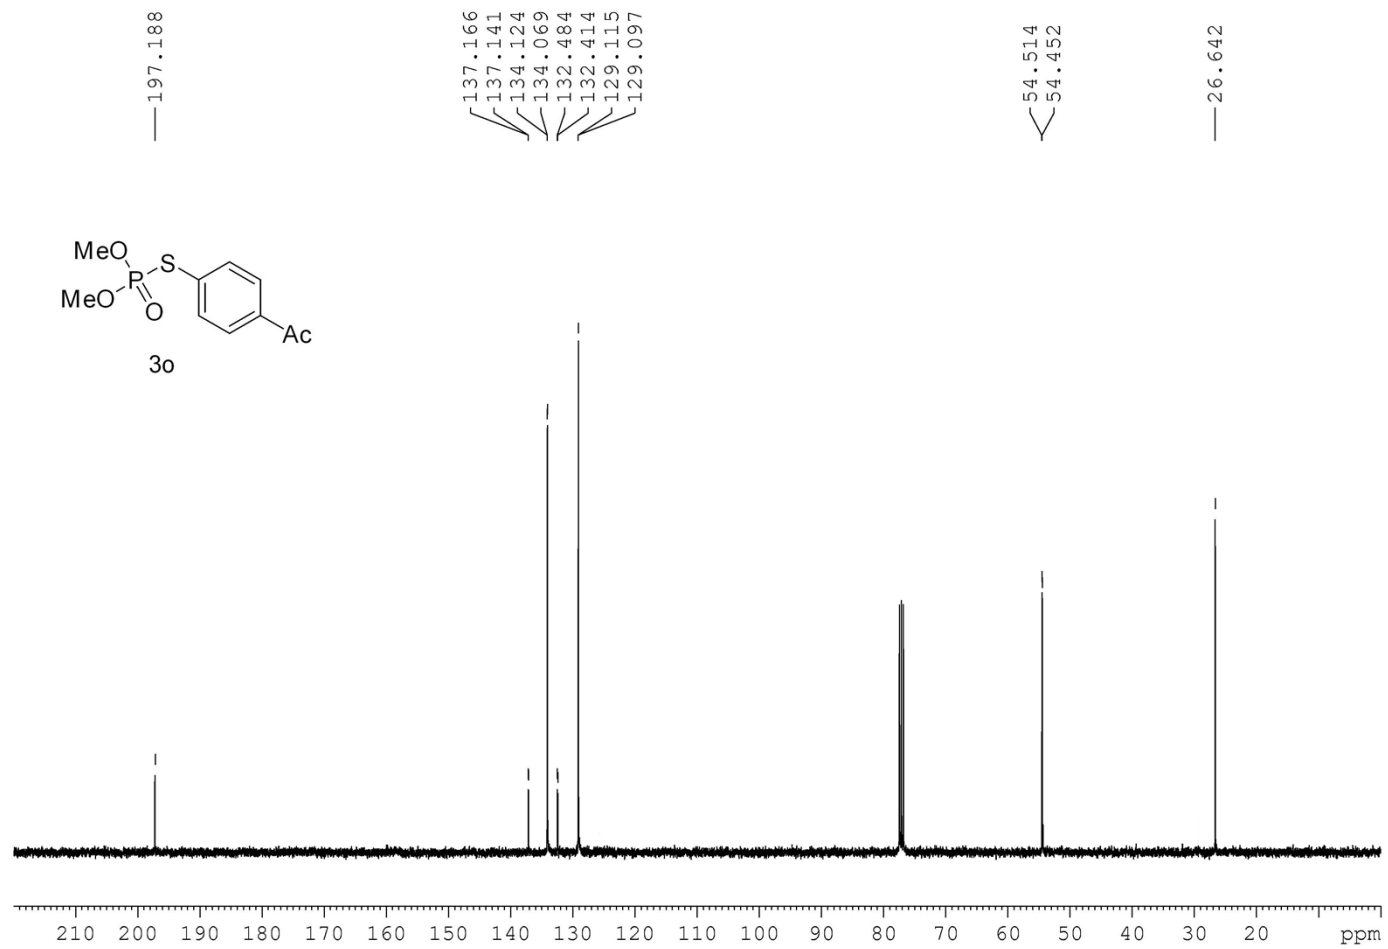

$^{13}\text{C}$  NMR spectrum of compound **30**

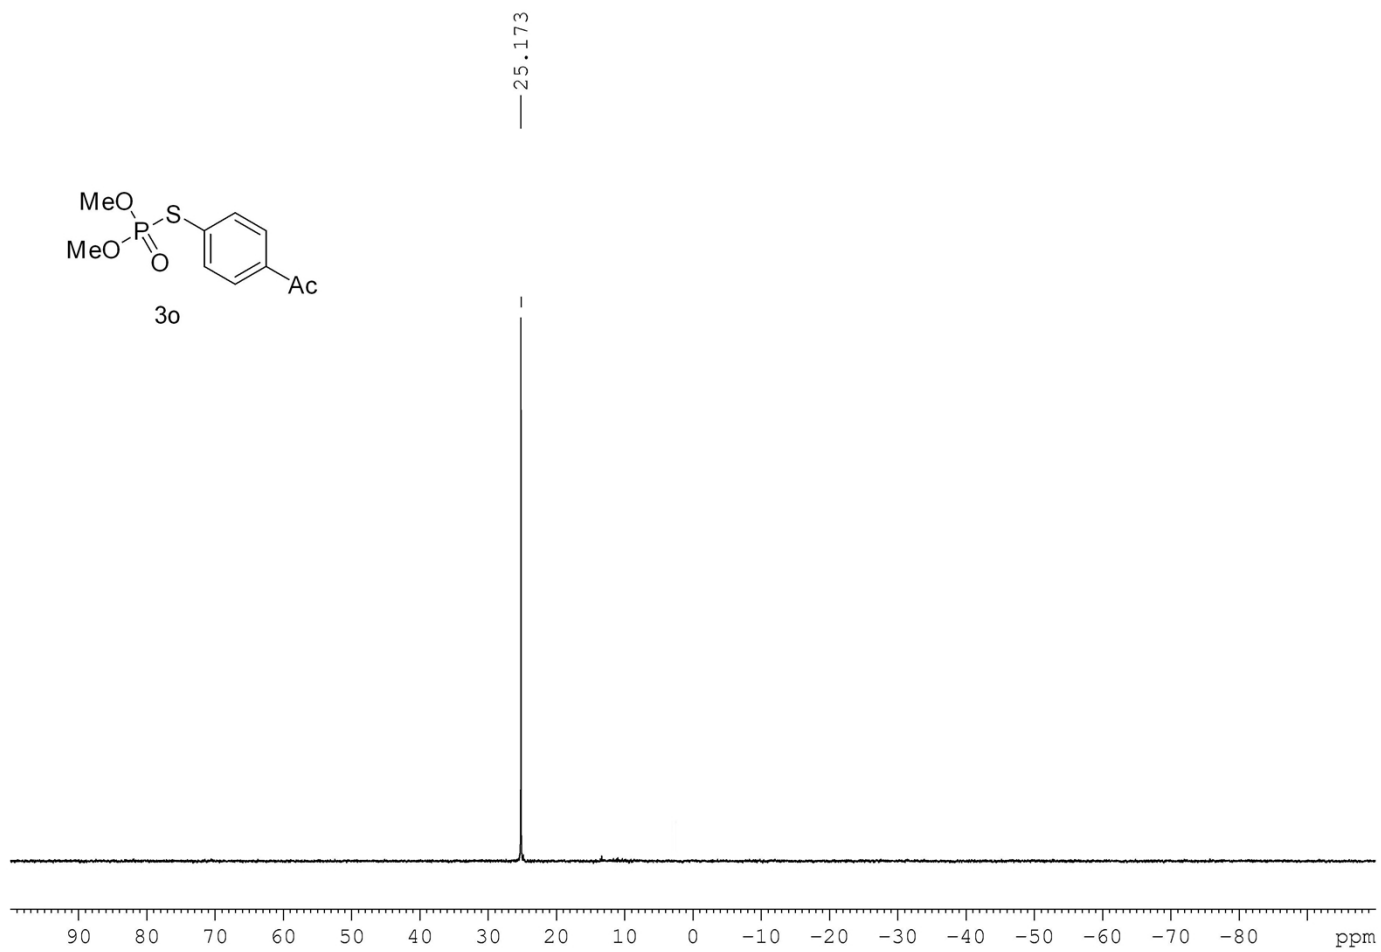

$^{13}\text{C}$  NMR spectrum of compound **3o**

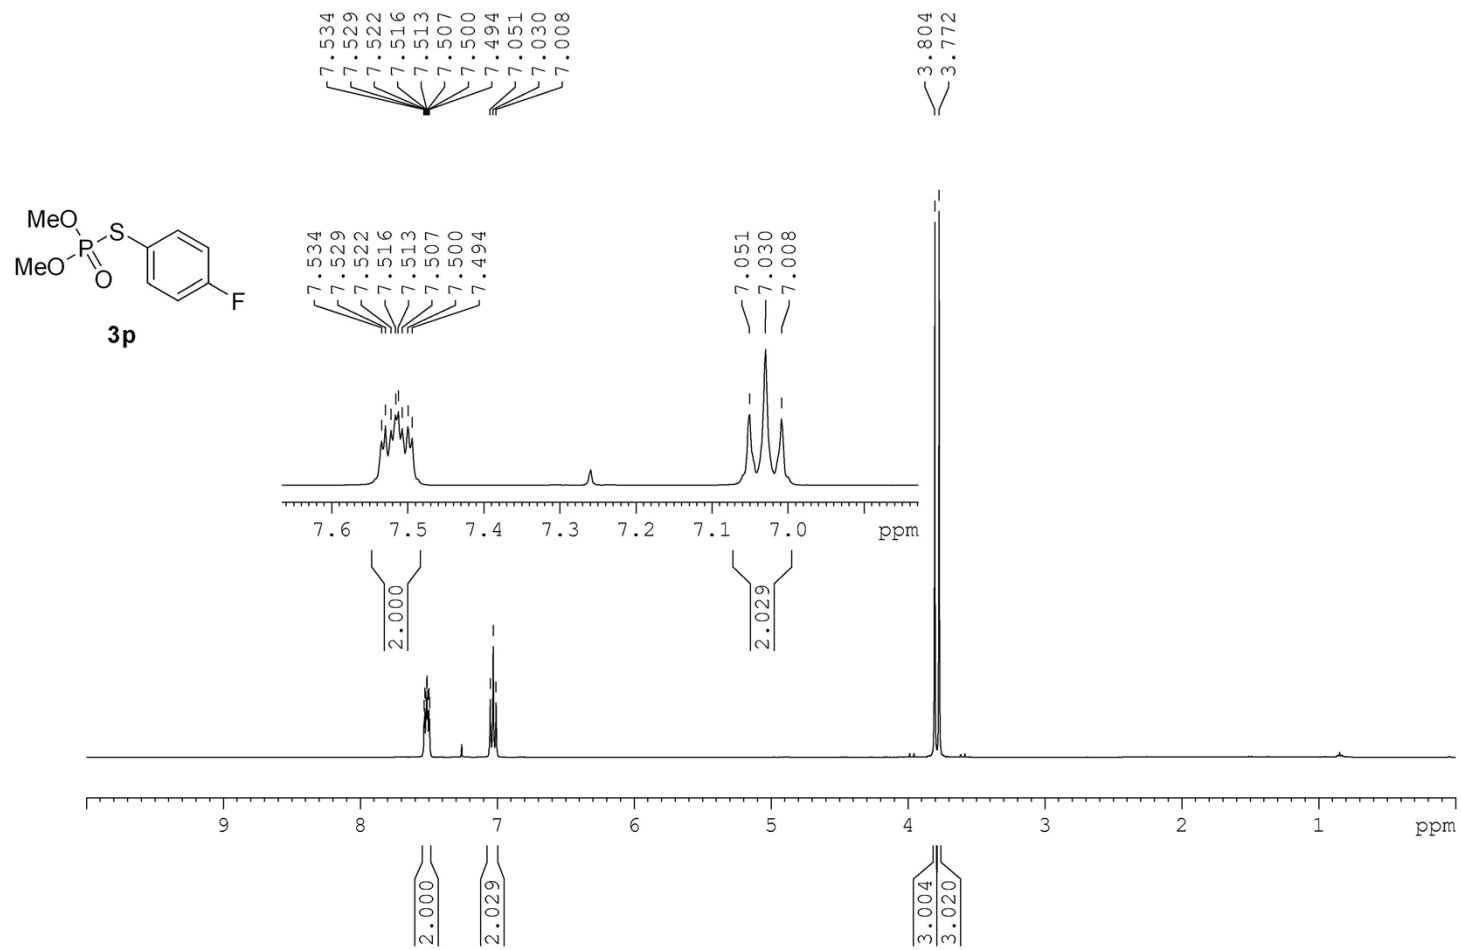

<sup>1</sup>H NMR spectrum of compound **3p**

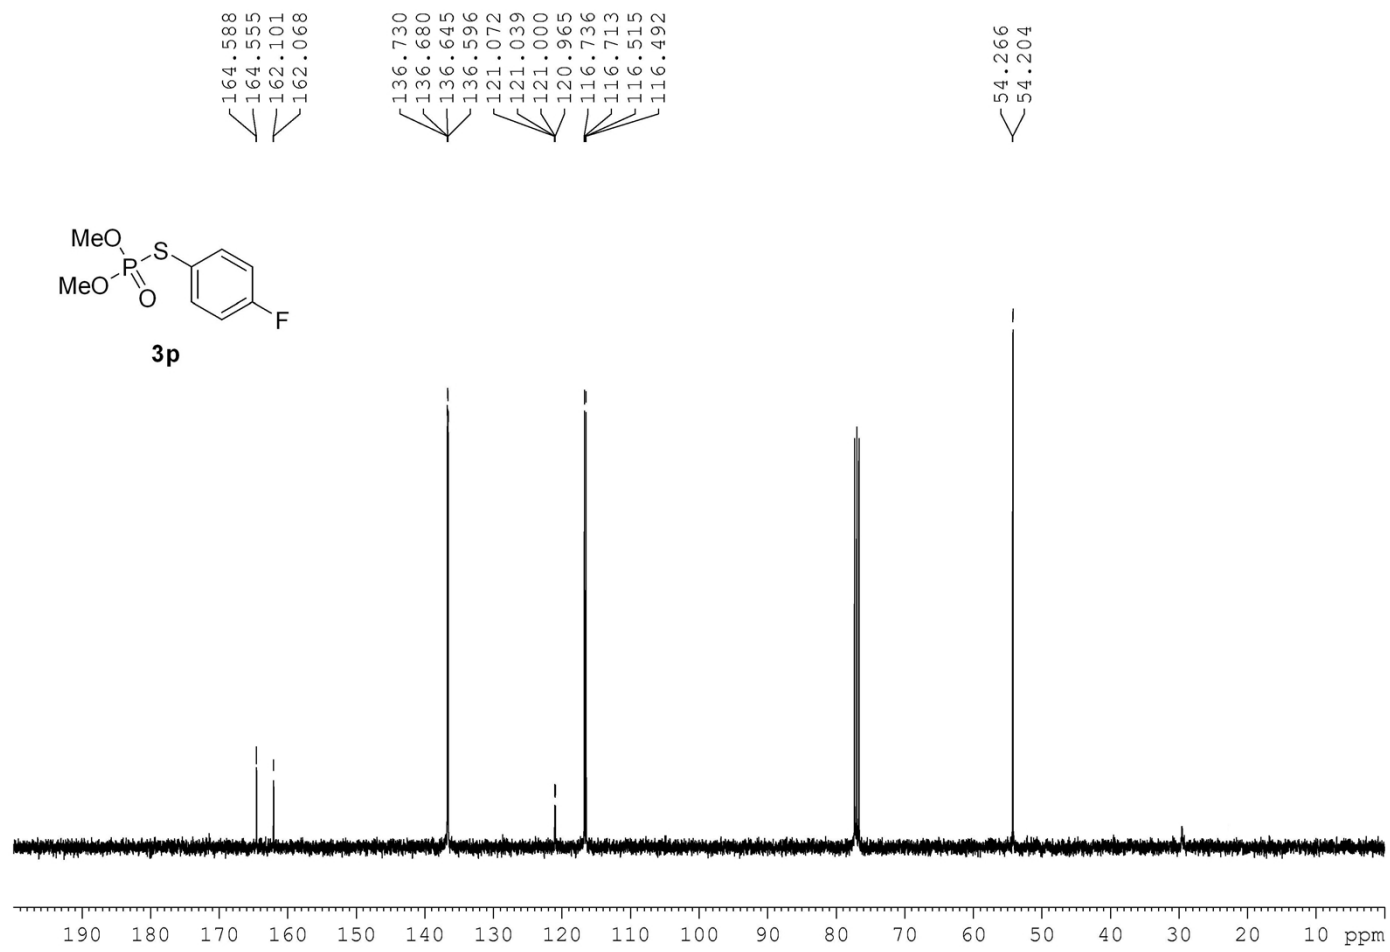

$^{13}\text{C}$  NMR spectrum of compound **3p**



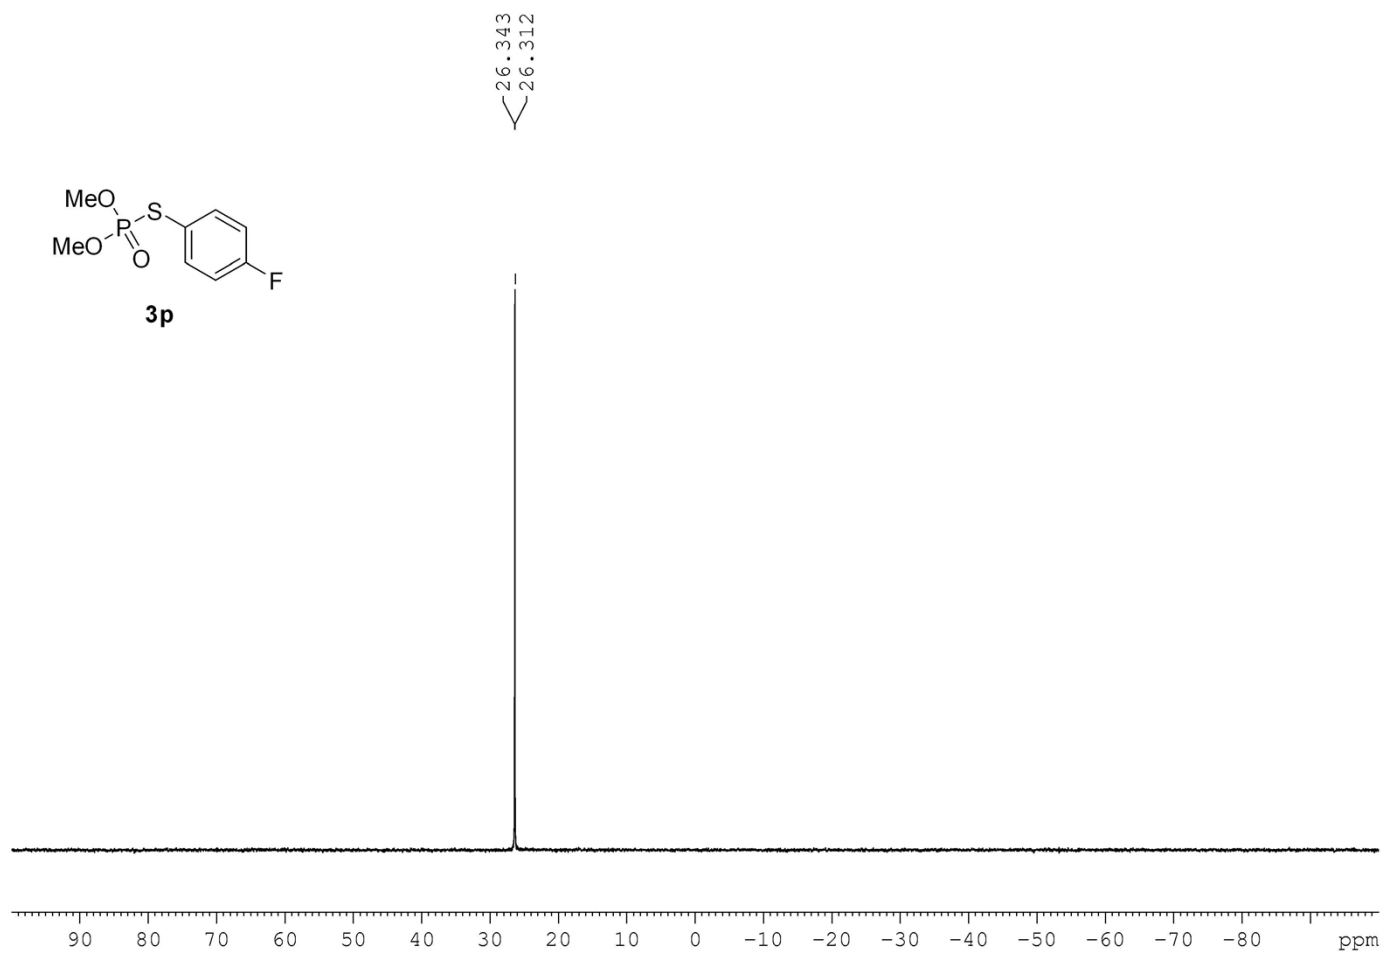

$^{31}\text{P}$  NMR spectrum of compound **3p**

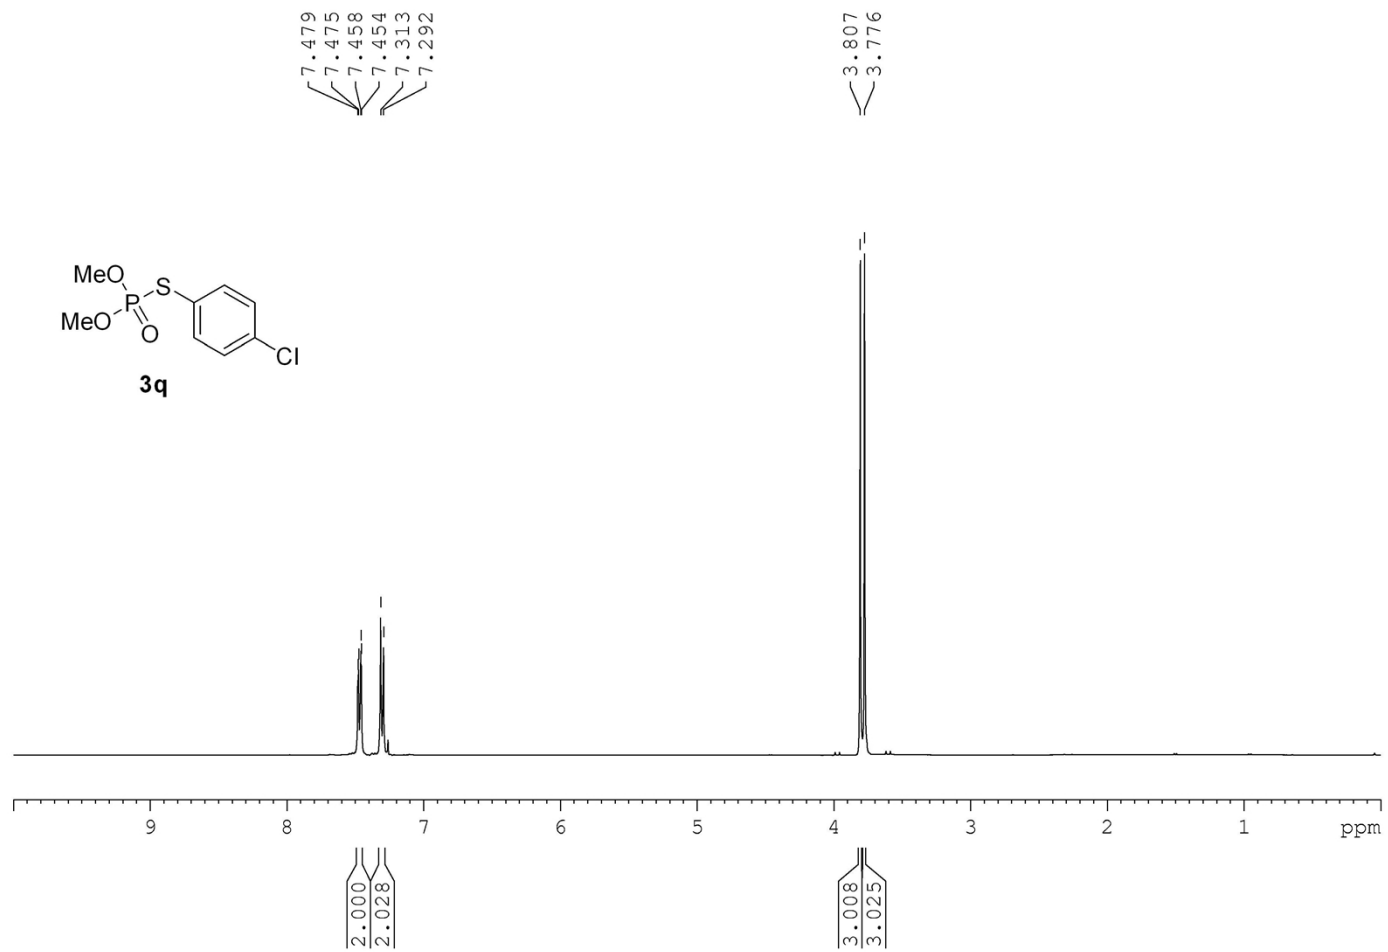

$^1\text{H}$  NMR spectrum of compound **3q**

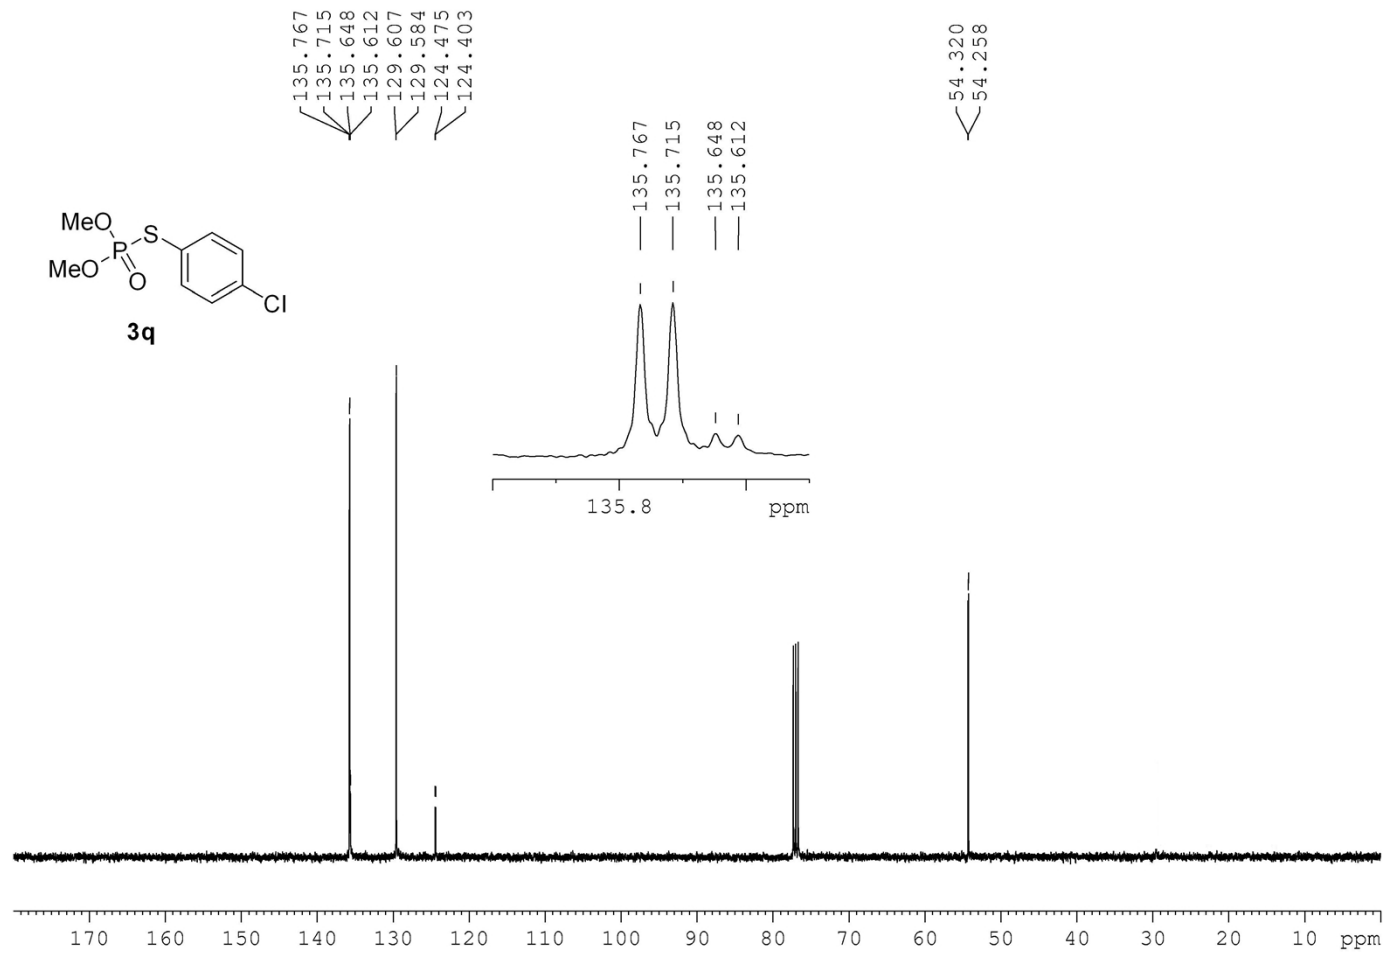

$^{13}\text{C}$  NMR spectrum of compound **3q**

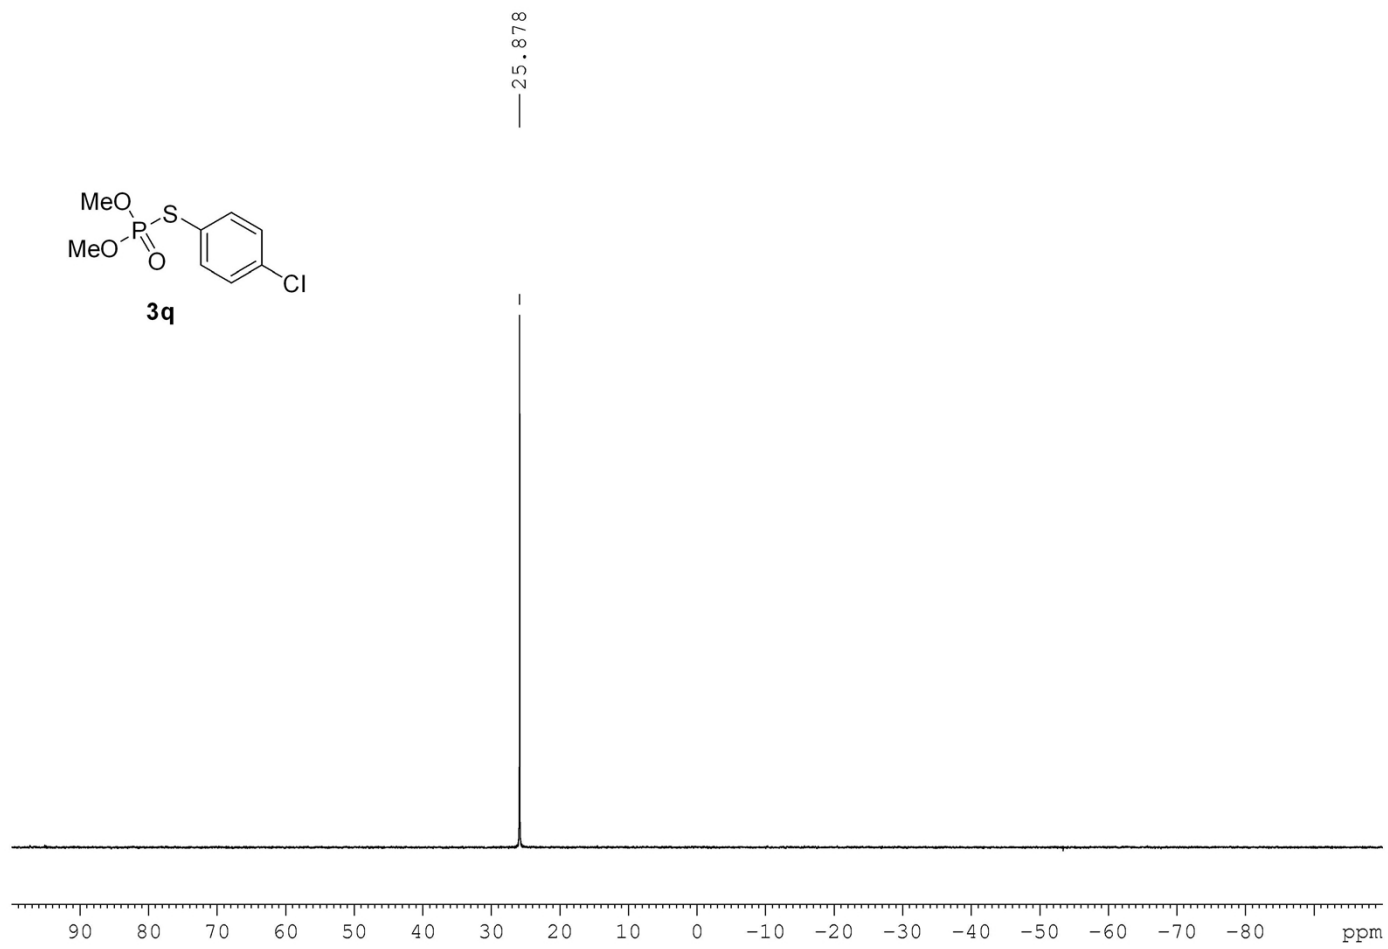

$^{31}\text{P}$  NMR spectrum of compound **3q**

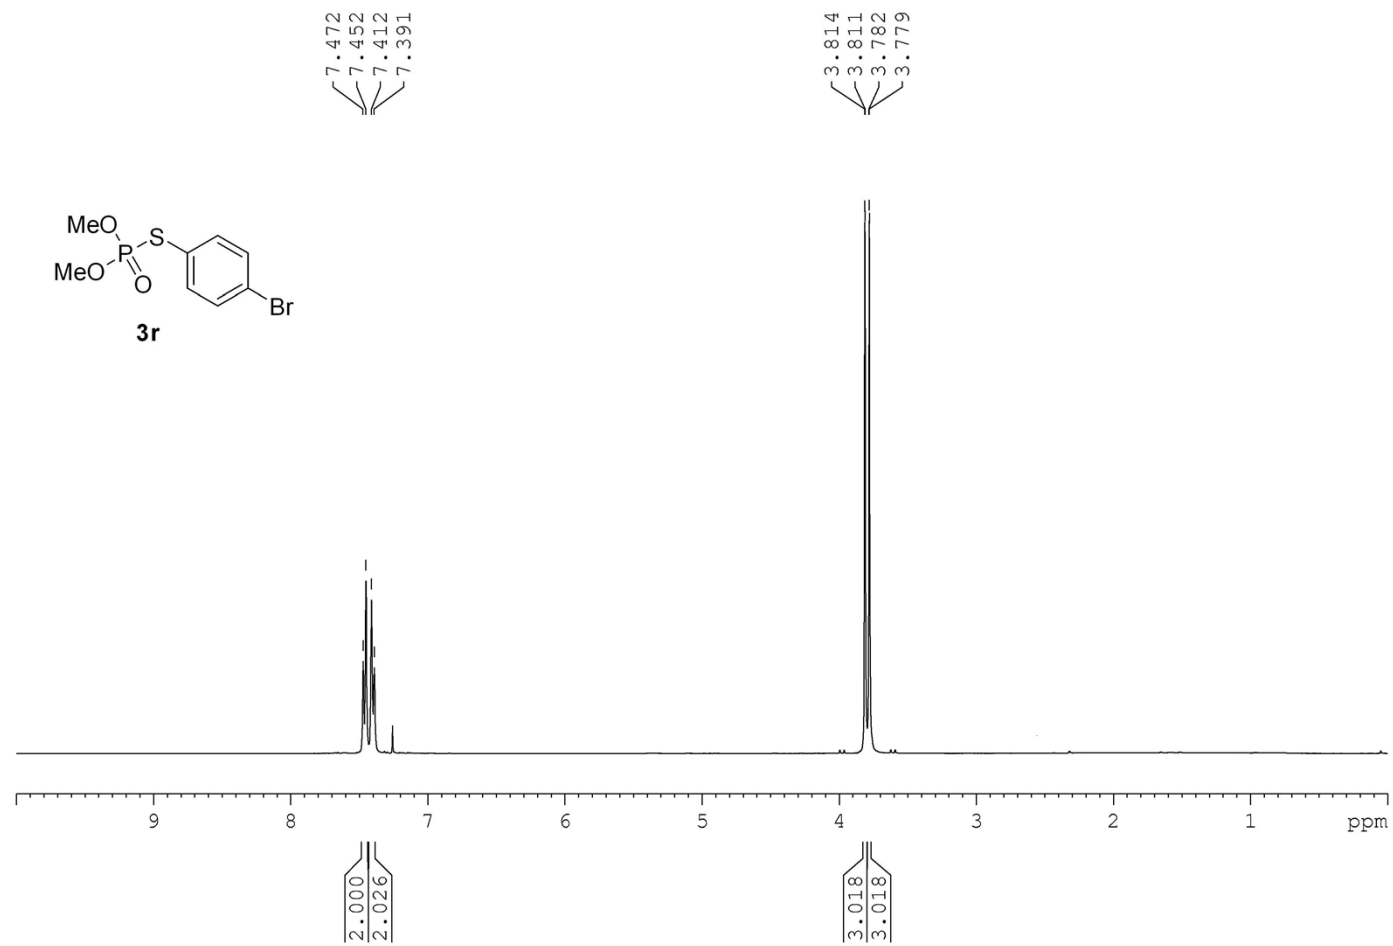

$^1\text{H}$  NMR spectrum of compound **3r**

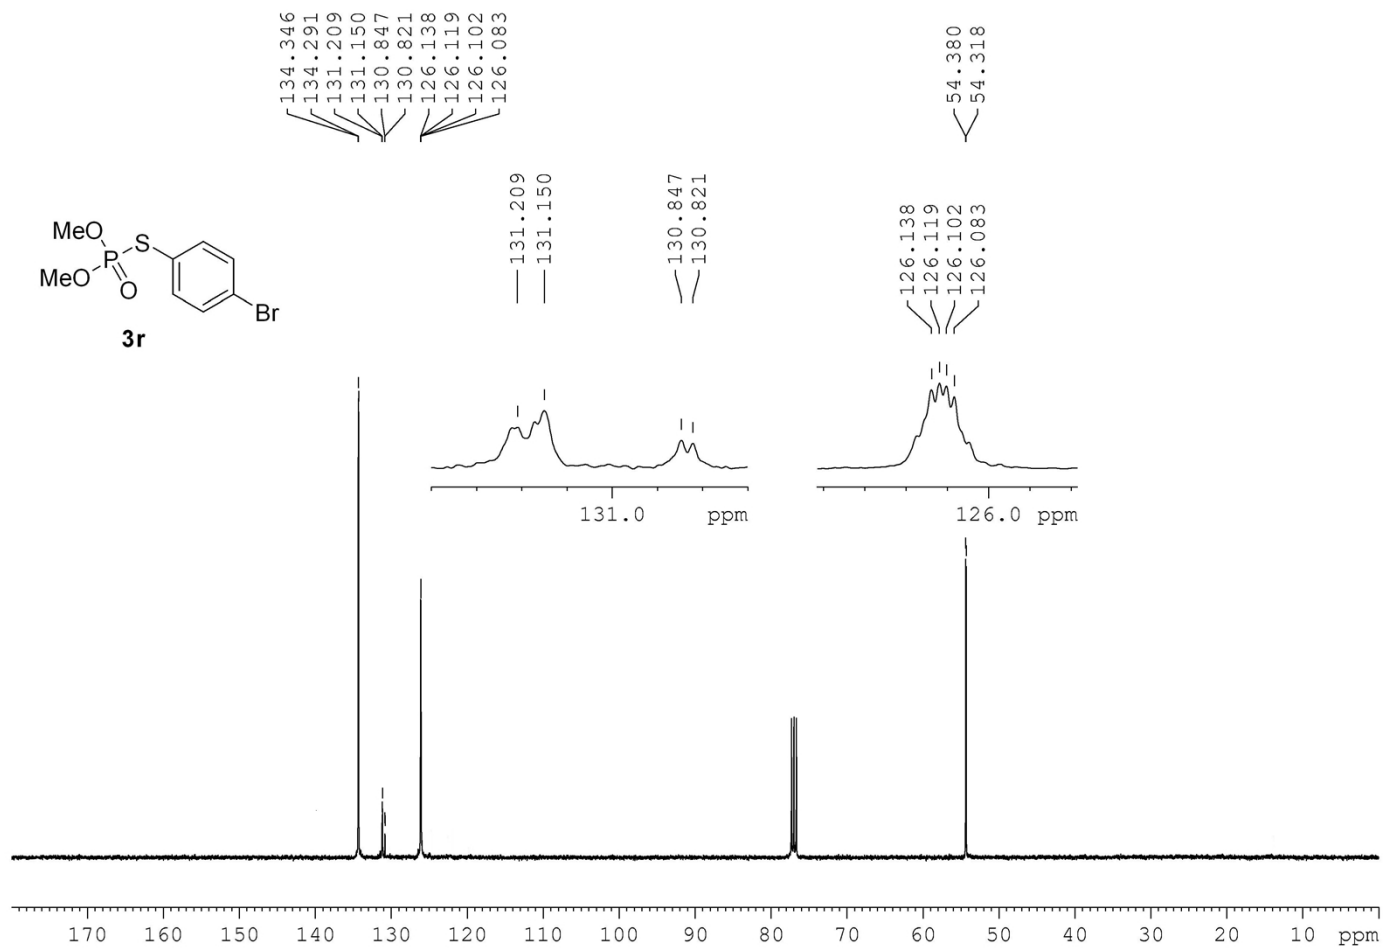

<sup>13</sup>C NMR spectrum of compound **3r**

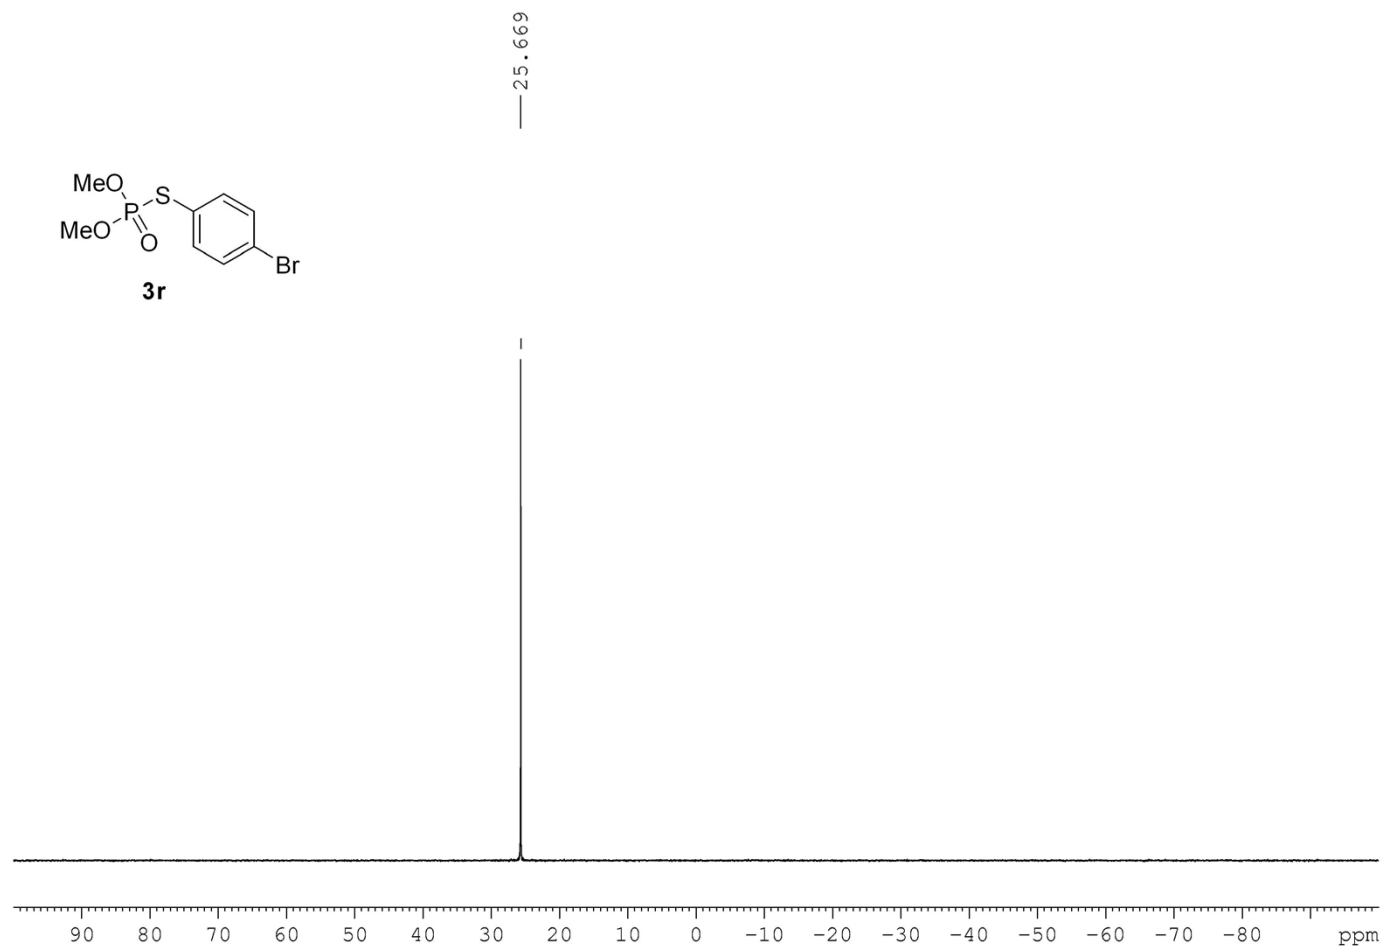

$^{31}\text{P}$  NMR spectrum of compound **3r**

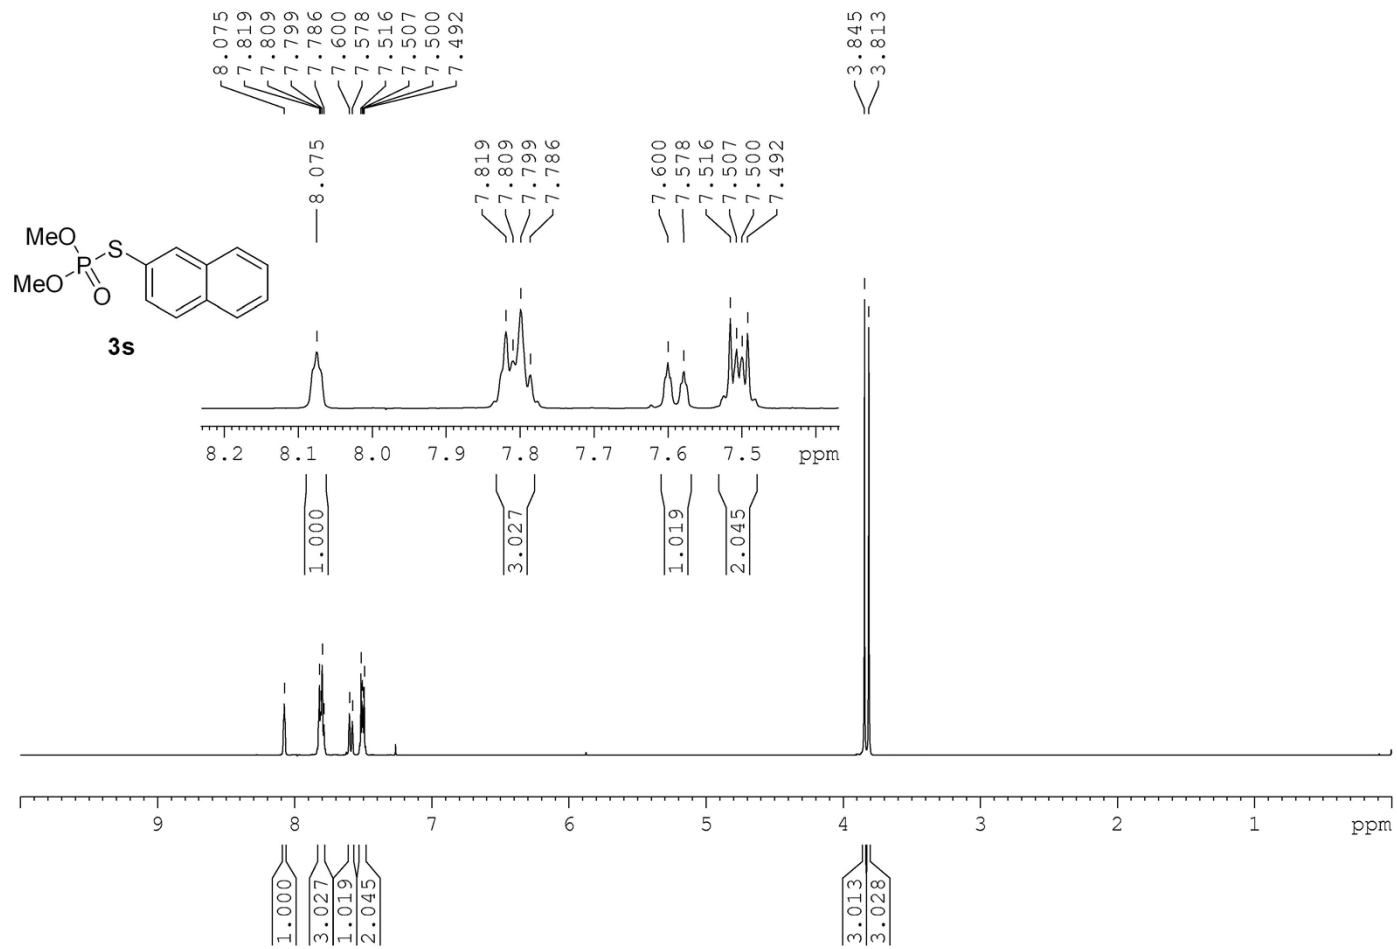

<sup>1</sup>H NMR spectrum of compound **3s**



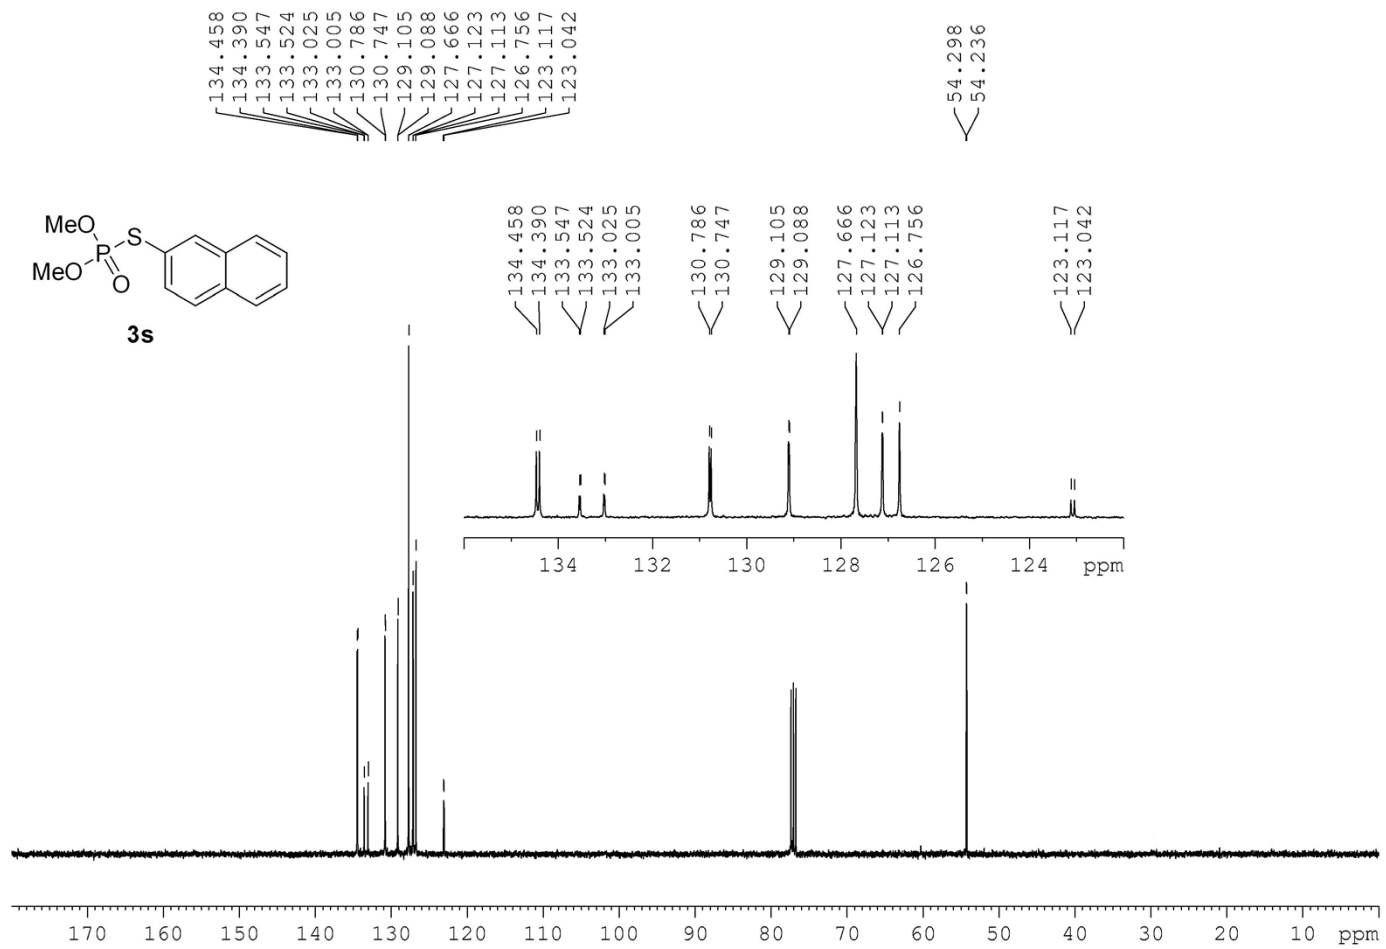

<sup>13</sup>C NMR spectrum of compound **3s**

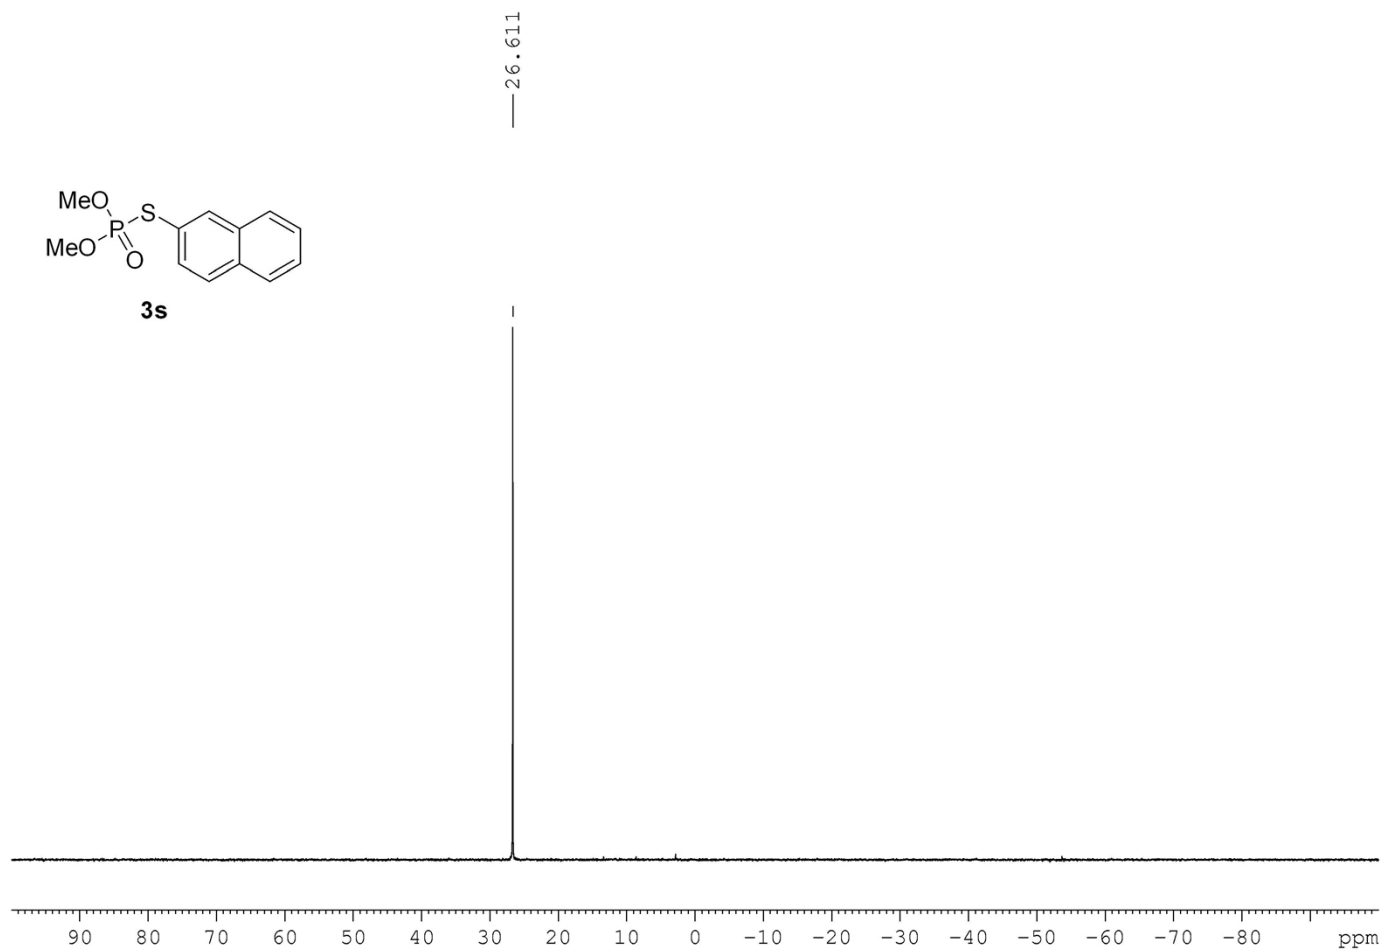

$^{31}\text{P}$  NMR spectrum of compound **3s**

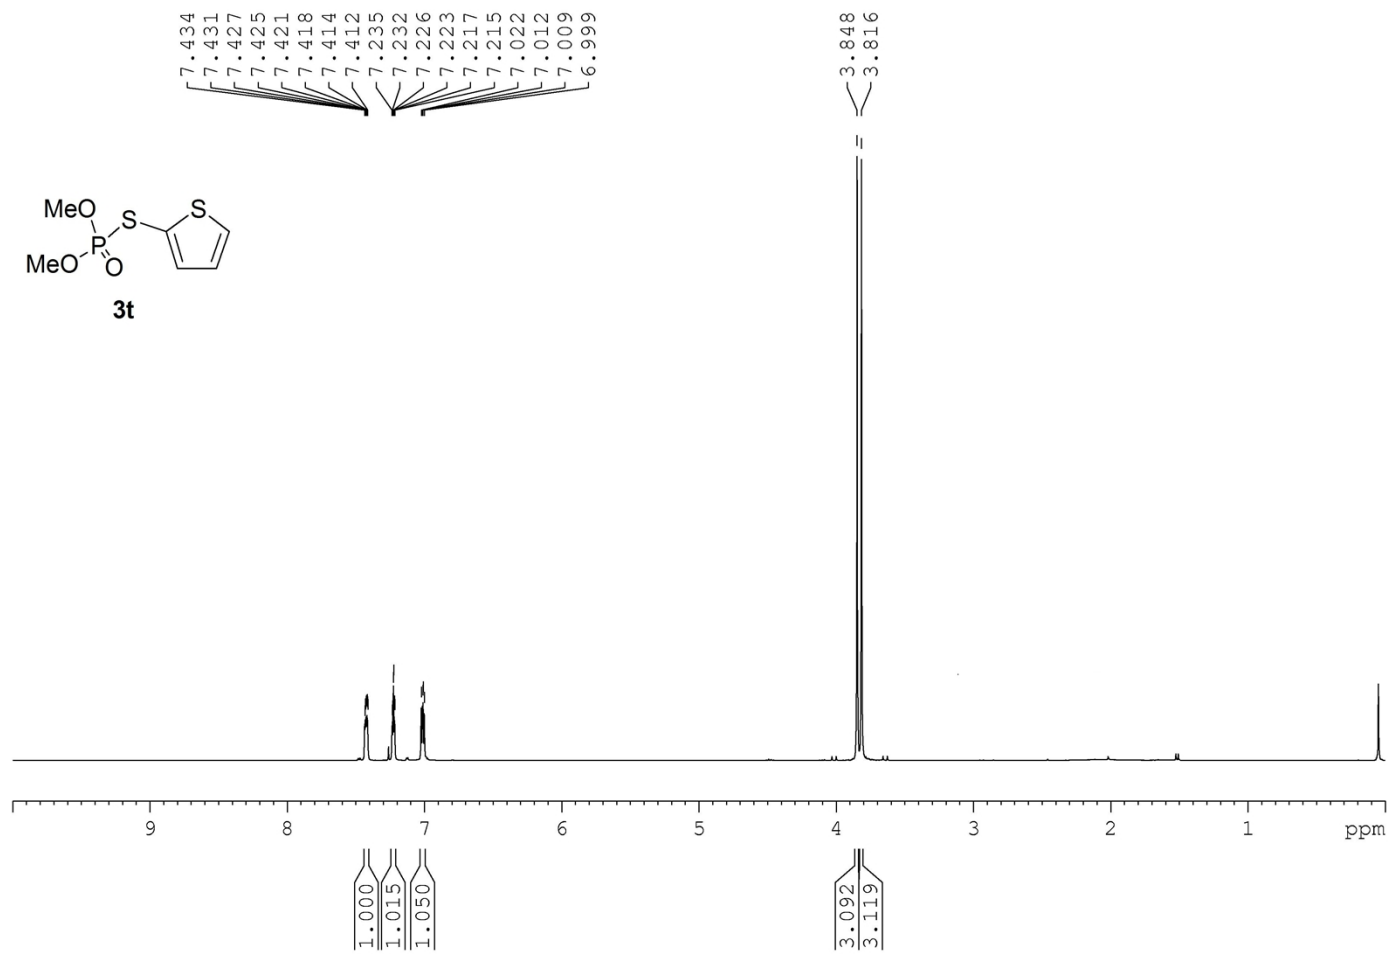

$^1\text{H}$  NMR spectrum of compound **3t**

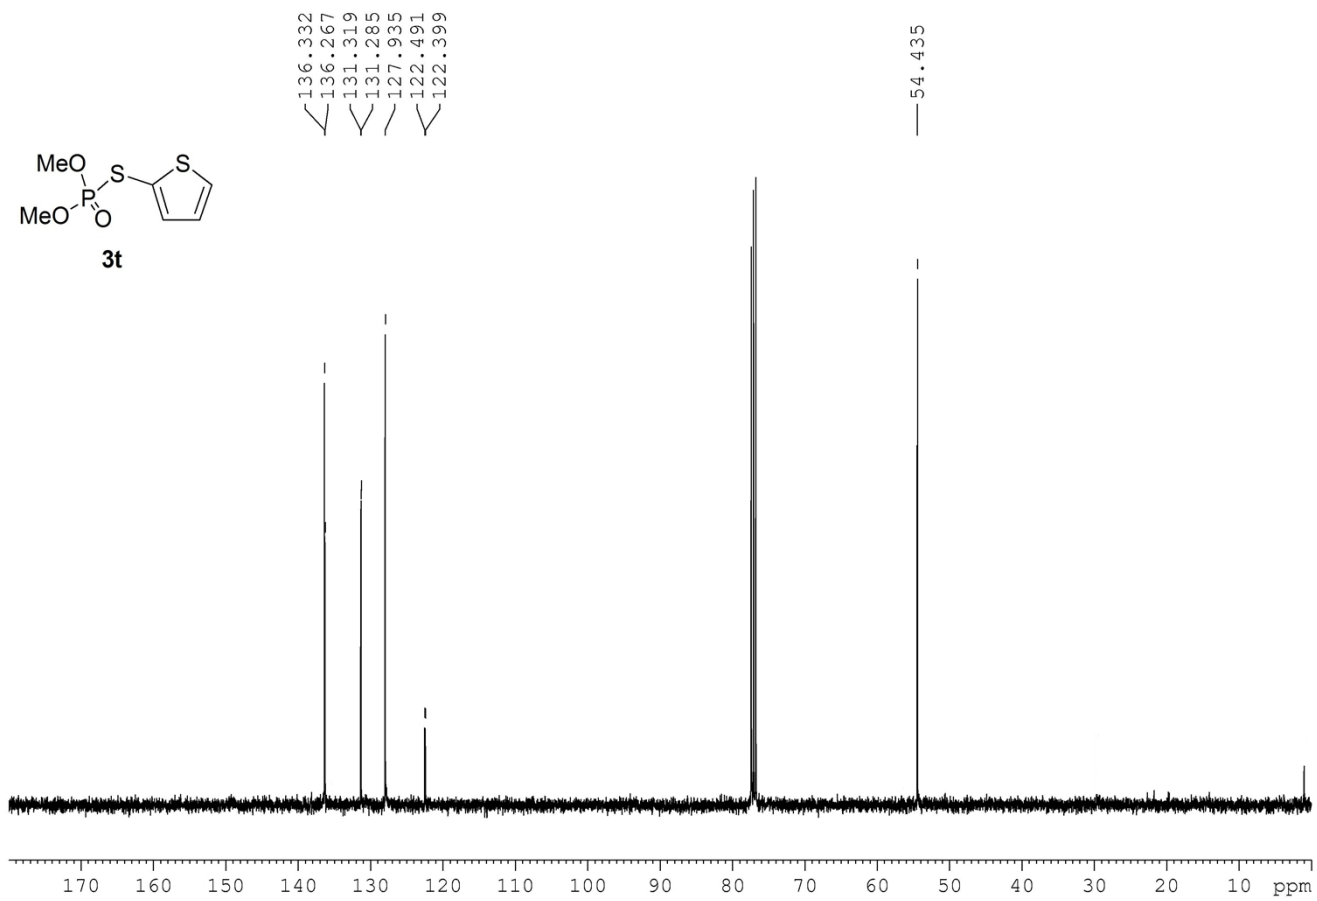

<sup>13</sup>C NMR spectrum of compound **3t**

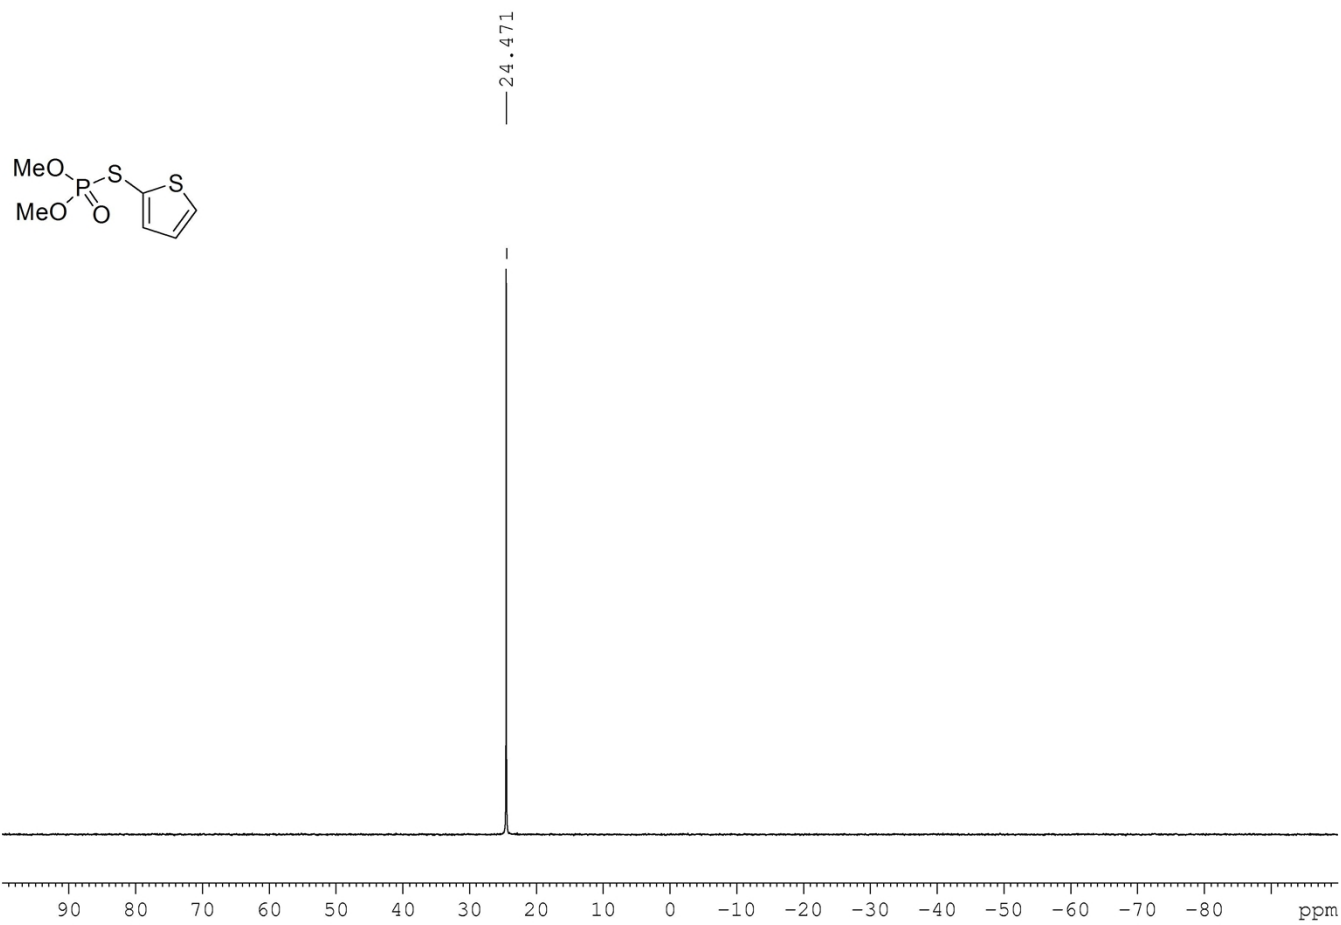

$^{31}\text{P}$  NMR spectrum of compound **3t**

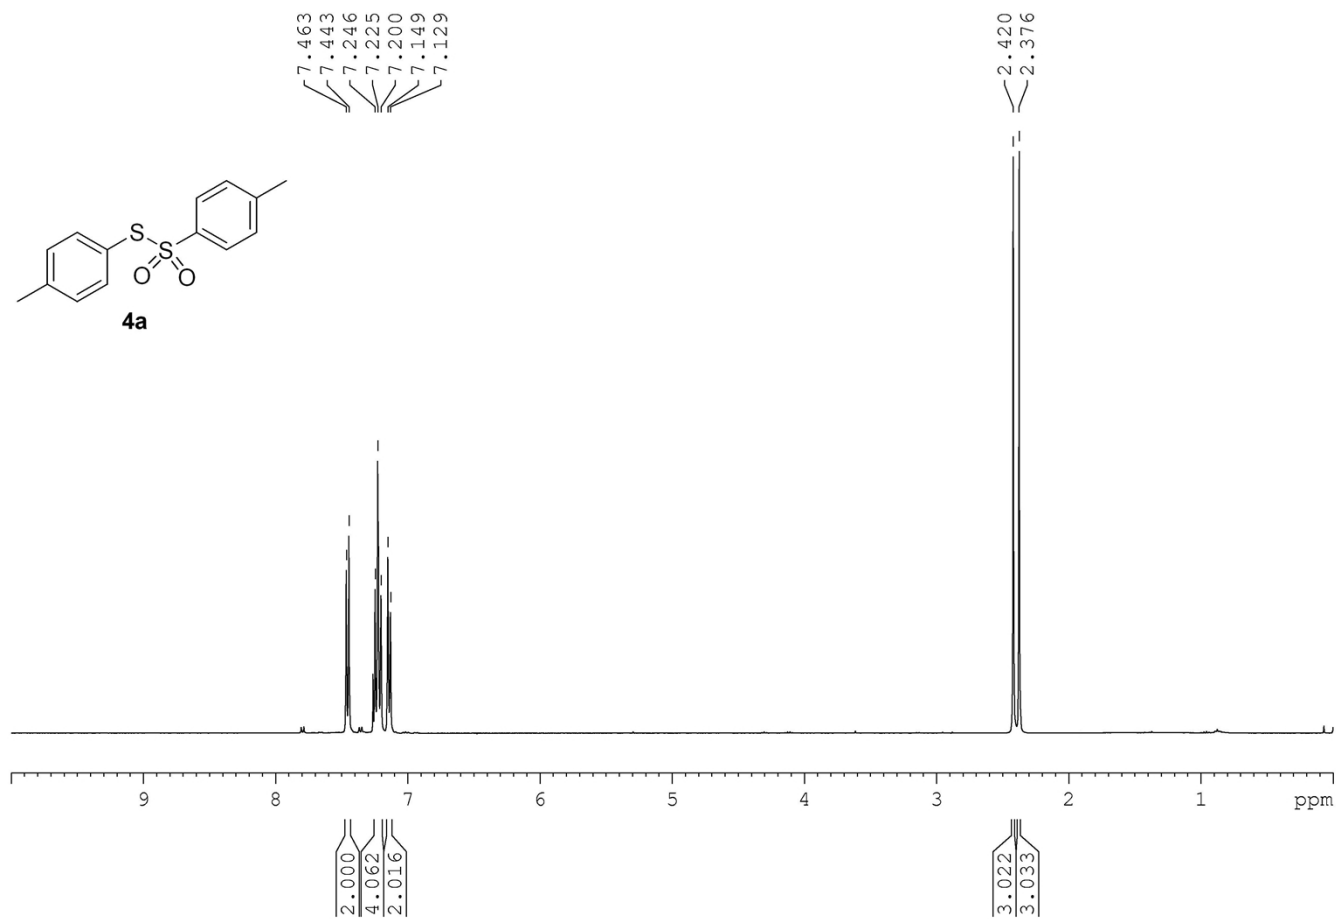

$^1\text{H}$  NMR spectrum of compound **4a**

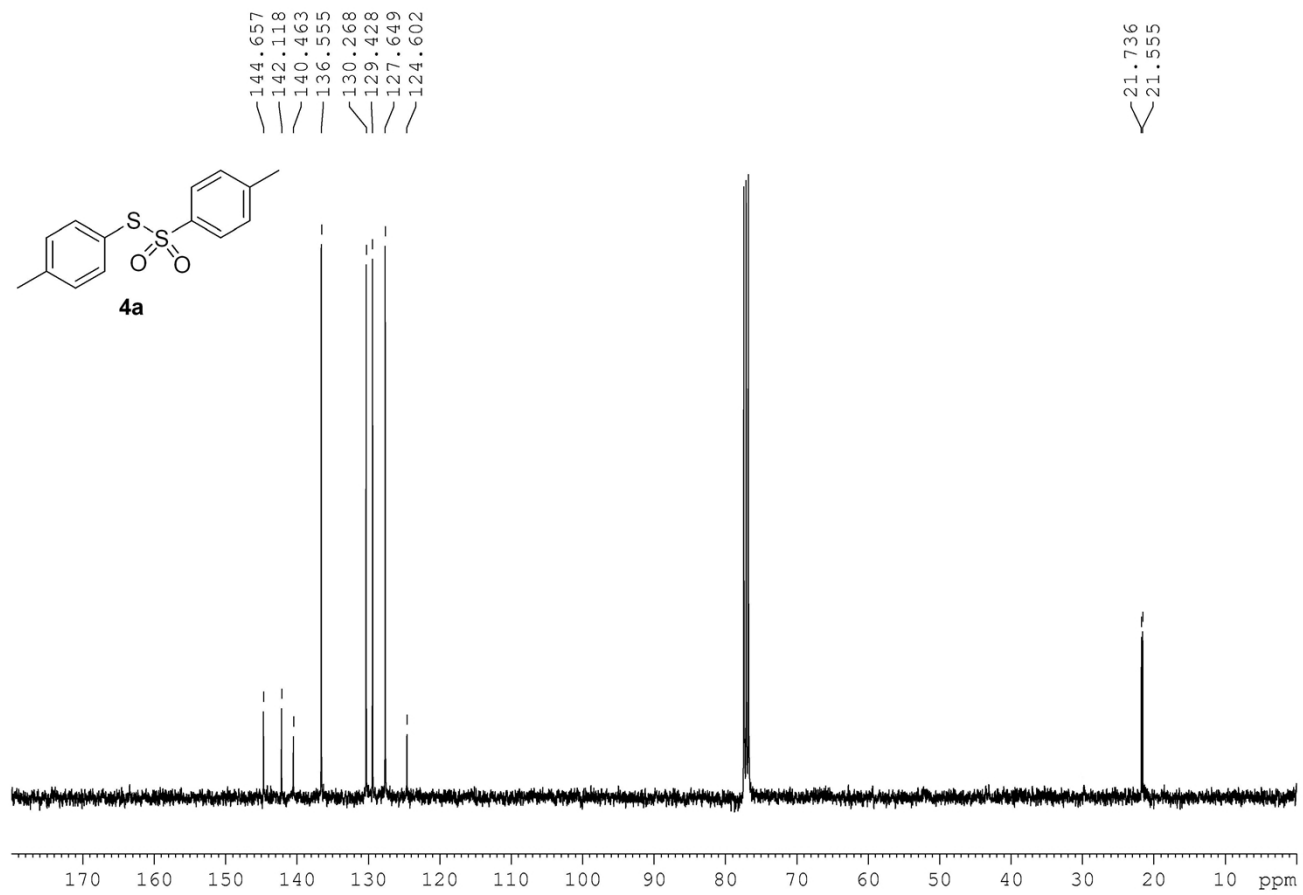

<sup>13</sup>C NMR spectrum of compound 4a

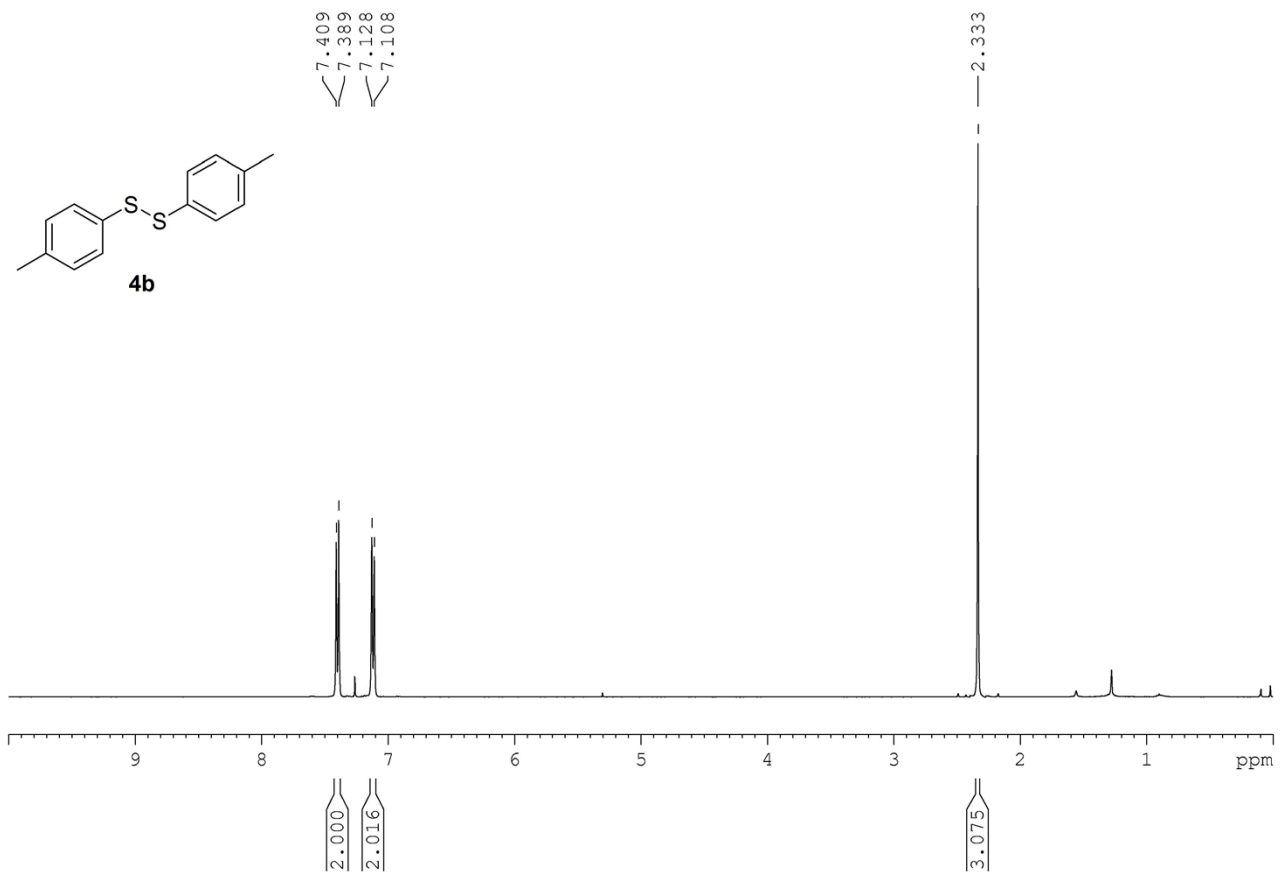

<sup>1</sup>H NMR spectrum of compound **4b**



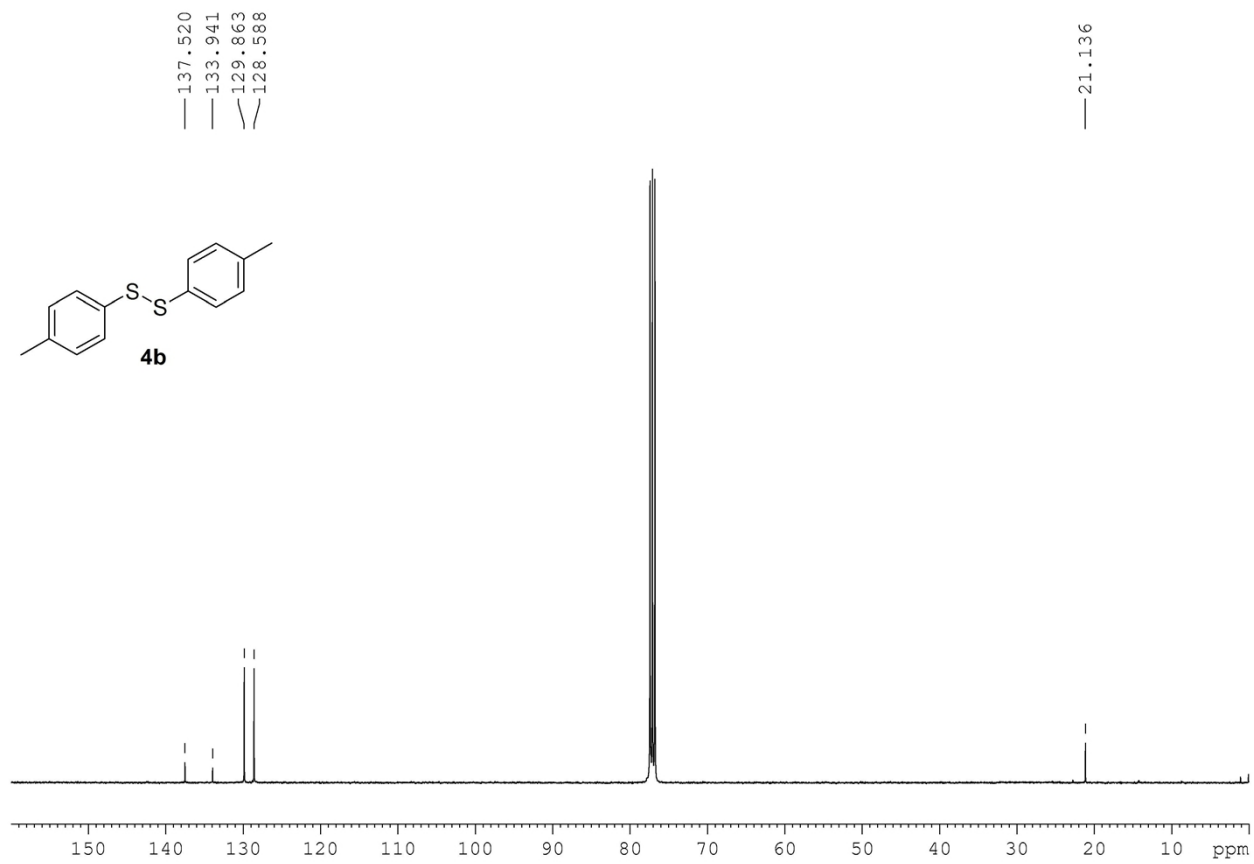

<sup>13</sup>C NMR spectrum of compound **4b**

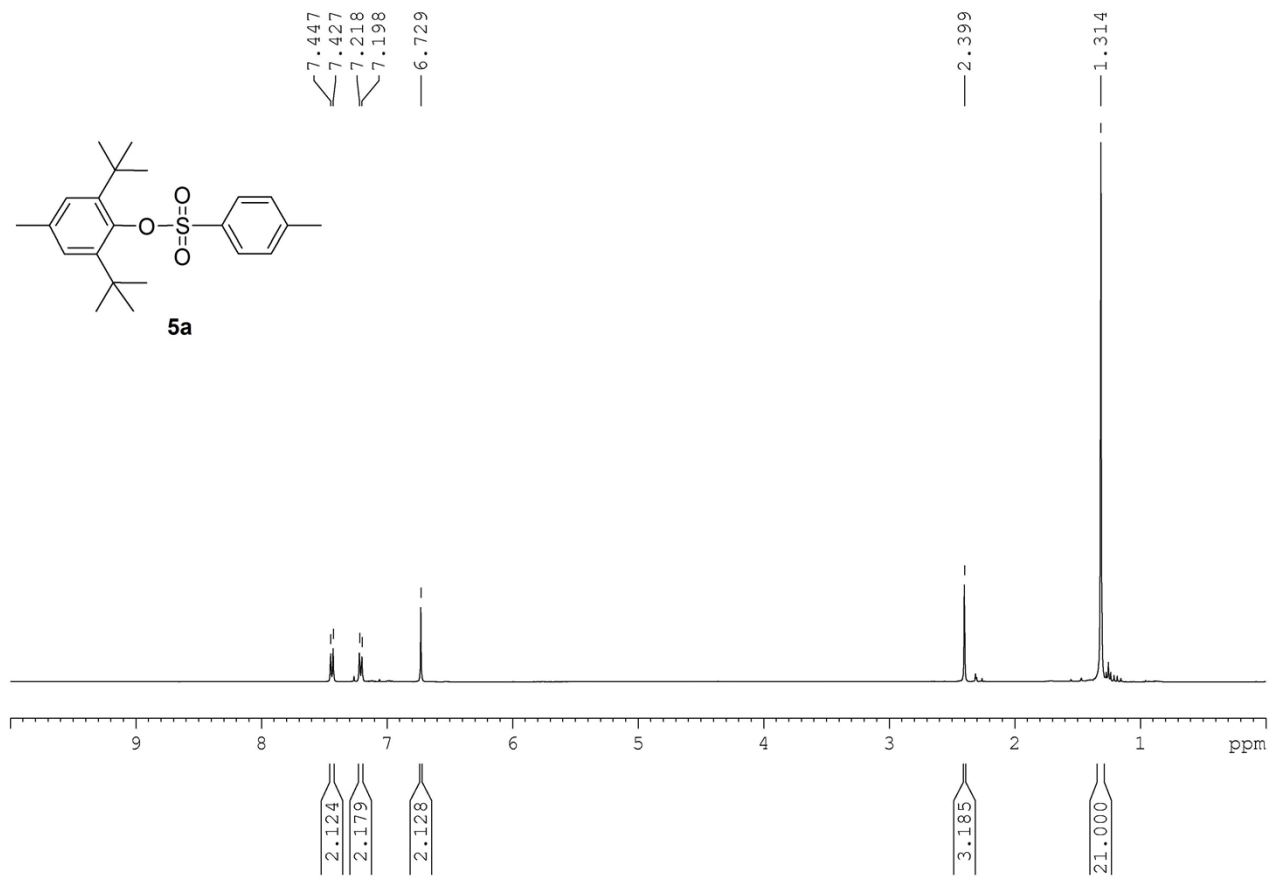

<sup>1</sup>H NMR spectrum of compound **5a**

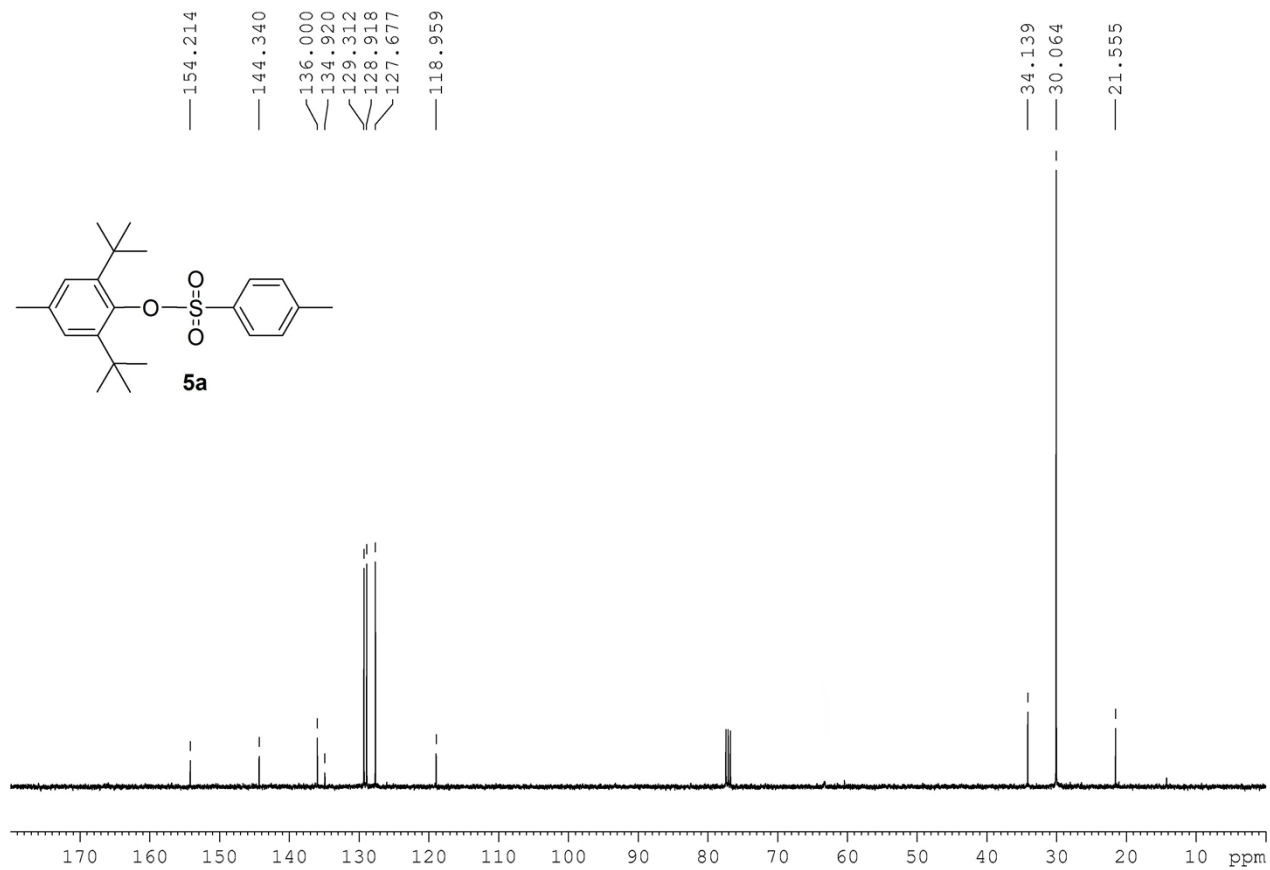

<sup>13</sup>C NMR spectrum of compound **5a**

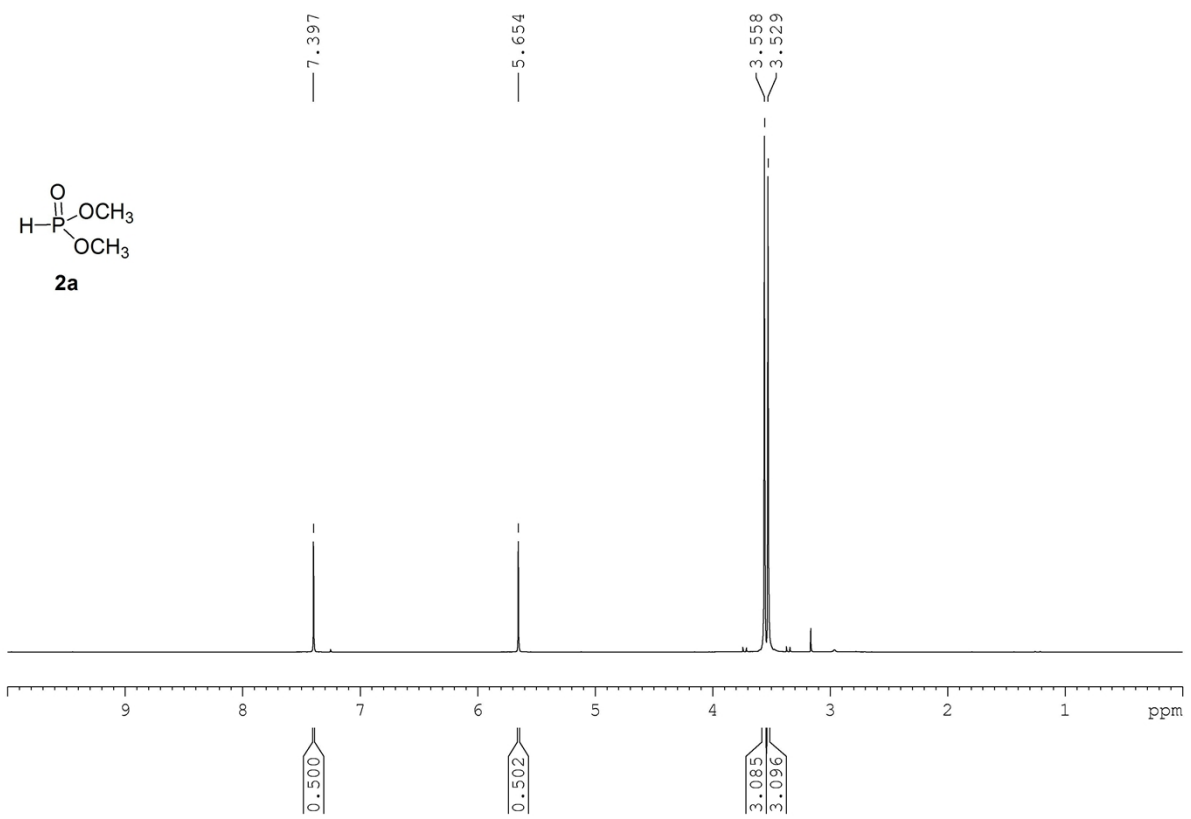

$^1\text{H}$  NMR spectrum of **2a**

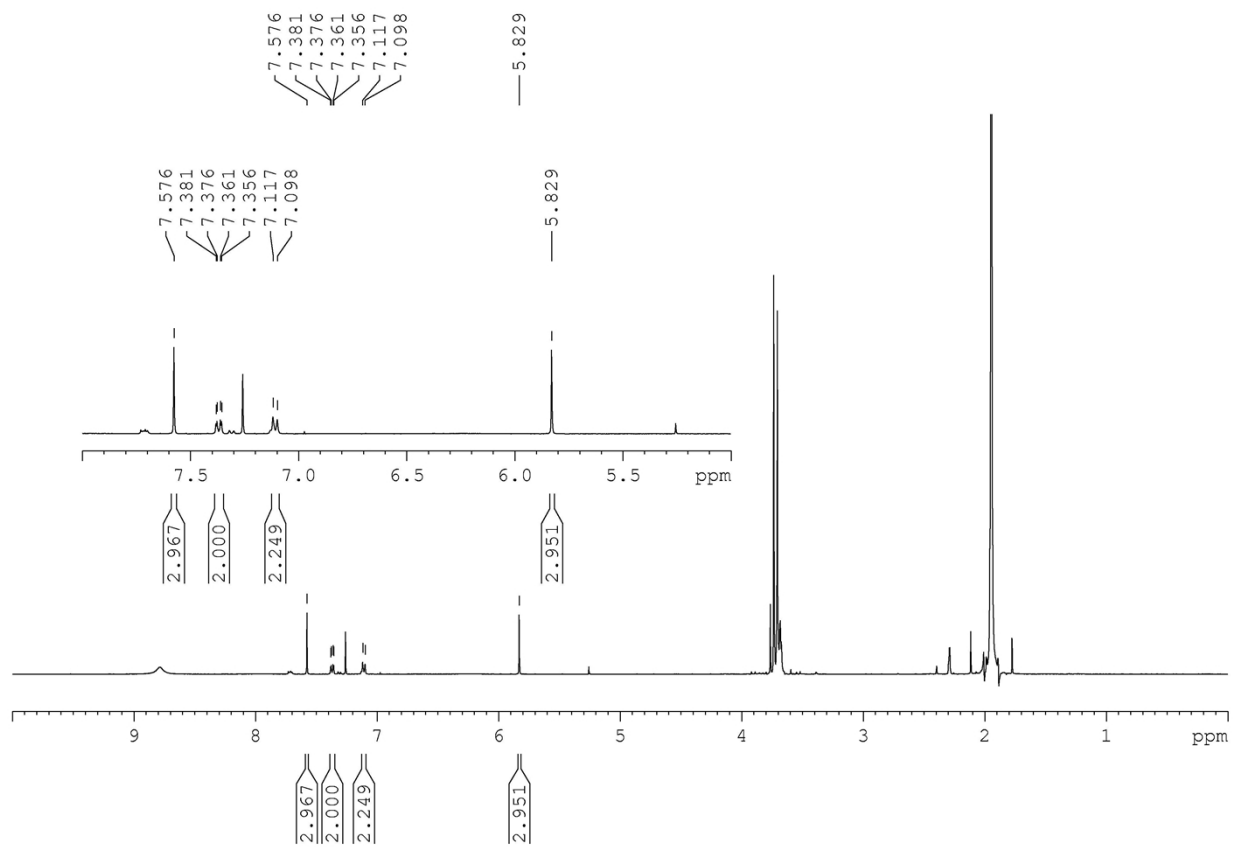

$^1\text{H}$  NMR spectrum to show the recovery of **2a**
